# Supplementary material for: Silicon isotope measurement in zircon by laser ablation multiple collector inductively coupled plasma mass spectrometry
Source: Royal Society of Chemistry journal article supplement (doi:10.1039/d0ja00214c), 2020-01-01
Supplement: d0ja00214c2.xlsx [file d0ja00214c2.xlsx]

## Sheet: Sheet1
Table S2 - Results for Si isotope measurements by LA-MC-ICP-MS of San Carlos olivine and 91500 zircon normalized to NIST 612
Name	δ29Si(‰)*	2 SD	δ30Si(‰)*	2 SD	Laser setup	Mode	SiS/SiNIST**
SanCarlos_1	-0.770678	0.122951	-1.35819	0.187417	6 Hz 40 µm	Spot	0.439946
SanCarlos_2	-0.617291	0.117222	-1.21641	0.16932	6 Hz 40 µm	Spot	0.431059
SanCarlos_3	-0.847804	0.136658	-1.76828	0.148765	6 Hz 40 µm	Spot	0.539487
SanCarlos_4	-0.801988	0.126805	-1.65561	0.15234	6 Hz 40 µm	Spot	0.515599
SanCarlos_5	-0.647369	0.111124	-1.21494	0.14673	6 Hz 40 µm	Spot	0.480241
SanCarlos_1	-0.846491	0.130413	-1.61472	0.147755	10 Hz 27 µm	Spot	0.580194
SanCarlos_2	-0.886367	0.16058	-1.69461	0.187455	10 Hz 27 µm	Spot	0.580023
SanCarlos_3	-0.791111	0.125229	-1.34545	0.145289	10 Hz 27 µm	Spot	0.564839
SanCarlos_4	-0.807932	0.126507	-1.92187	0.155629	10 Hz 27 µm	Spot	0.572967
SanCarlos_5	-0.920062	0.139405	-1.77216	0.153042	10 Hz 27 µm	Spot	0.561132
SanCarlos_1	-0.681968	0.107995	-1.34806	0.112305	10 Hz 27 µm	Raster	0.8633
SanCarlos_2	-0.552971	0.10018	-1.09855	0.112353	10 Hz 27 µm	Raster	0.89532
SanCarlos_3	-0.596875	0.105767	-1.16805	0.146131	10 Hz 27 µm	Raster	0.877596
SanCarlos_4	-0.556076	0.101472	-1.16426	0.15034	10 Hz 27 µm	Raster	0.885725
SanCarlos_5	-0.568008	0.096558	-1.07008	0.139893	10 Hz 27 µm	Raster	0.893004
SanCarlos_6	-0.607205	0.0881682	-1.28023	0.138995	10 Hz 27 µm	Raster	0.889451
SanCarlos_7	-0.594627	0.0922209	-1.34723	0.143291	10 Hz 27 µm	Raster	0.896822
SanCarlos_8	-0.635959	0.101686	-1.17864	0.14059	10 Hz 27 µm	Raster	0.901337
SanCarlos_9	-0.54796	0.0855611	-1.03103	0.142163	10 Hz 27 µm	Raster	0.911193
SanCarlos_10	-0.61354	0.106557	-1.24231	0.139855	10 Hz 27 µm	Raster	0.910246
91500_1	0.195617	0.134992	0.394637	0.15387	6 Hz 40 µm	Spot	0.600142
91500_2	0.16875	0.153031	0.300216	0.148896	6 Hz 40 µm	Spot	0.608917
91500_3	0.0811658	0.139752	0.261645	0.144809	6 Hz 40 µm	Spot	0.614524
91500_4	0.169479	0.125182	0.36077	0.136396	6 Hz 40 µm	Spot	0.621151
91500_5	0.31132	0.112767	0.53023	0.149186	6 Hz 40 µm	Spot	0.626859
91500_1	0.0851937	0.171962	0.0199213	0.14188	10 Hz 27 µm	Spot	0.687997
91500_2	-0.0303449	0.170006	-0.133965	0.136225	10 Hz 27 µm	Spot	0.716985
91500_3	-0.259229	0.152293	-0.51652	0.130981	10 Hz 27 µm	Spot	0.698193
91500_4	0.10362	0.148823	0.102084	0.139324	10 Hz 27 µm	Spot	0.668859
91500_5	0.102872	0.148761	-0.090498	0.139907	10 Hz 27 µm	Spot	0.65085
* Delta values are relative to NBS 28 but normalized to NIST 612 that was analyzed in the same conditions except for the rasters for which NIST 612 was analyzed using 6 Hz and 27 µm.
** S refers to sample (San Carlos or 91500) and NIST to NIST 612.
