# Supplementary material for: Silicon isotope measurement in zircon by laser ablation multiple collector inductively coupled plasma mass spectrometry
Source: Royal Society of Chemistry journal article supplement (doi:10.1039/d0ja00214c), 2020-01-01
Supplement: d0ja00214c3.xlsx [file d0ja00214c3.xlsx]

## Sheet: 91500
Table S3. All results for 91500 (self-bracketed) analyzed by LA-MC-ICP-MS in line mode
Name	δ29Si	2SE	δ30Si	2SE	Analysis	Repetition rate	Spot size	Fluence	Date
91500_1	0.0121515	0.111293	0.187849	0.119251	Raster	6 Hz	33 μm	~3 J.cm-2	22-03-2018
91500_2	-0.0460911	0.106293	-0.0897561	0.120763	Raster	6 Hz	33 μm	~3 J.cm-2	22-03-2018
91500_3	0.126042	0.105934	0.0524764	0.134091	Raster	6 Hz	33 μm	~3 J.cm-2	22-03-2018
91500_4	-0.0886089	0.114022	-0.0671814	0.128996	Raster	6 Hz	33 μm	~3 J.cm-2	22-03-2018
91500_5	0.0267509	0.111152	0.0753518	0.133752	Raster	6 Hz	33 μm	~3 J.cm-2	22-03-2018
91500_6	-0.0177067	0.113153	-0.0458282	0.118536	Raster	6 Hz	33 μm	~3 J.cm-2	22-03-2018
91500_7	0.107694	0.110474	0.17066	0.122257	Raster	6 Hz	33 μm	~3 J.cm-2	22-03-2018
91500_8	-0.0454166	0.123799	-0.0696457	0.126856	Raster	6 Hz	33 μm	~3 J.cm-2	22-03-2018
91500_9	-0.0875727	0.121607	-0.0513524	0.149779	Raster	6 Hz	33 μm	~3 J.cm-2	22-03-2018
91500_10	0.119101	0.120888	0.187365	0.157627	Raster	6 Hz	33 μm	~3 J.cm-2	22-03-2018
91500_11	-0.128561	0.105066	-0.100956	0.131195	Raster	6 Hz	33 μm	~3 J.cm-2	22-03-2018
91500_12	0.0931846	0.110461	0.0218943	0.12795	Raster	6 Hz	33 μm	~3 J.cm-2	22-03-2018
91500_13	-0.0545066	0.116708	0.100739	0.141922	Raster	6 Hz	33 μm	~3 J.cm-2	22-03-2018
91500_14	0.031575	0.117683	-0.116081	0.14401	Raster	6 Hz	33 μm	~3 J.cm-2	22-03-2018
91500_15	0.0796257	0.108407	0.174392	0.145538	Raster	6 Hz	33 μm	~3 J.cm-2	22-03-2018
91500_16	-0.104258	0.105628	-0.114241	0.129793	Raster	6 Hz	33 μm	~3 J.cm-2	22-03-2018
91500_17	0.106401	0.104181	0.171431	0.139133	Raster	6 Hz	33 μm	~3 J.cm-2	22-03-2018
91500_18	-0.0481907	0.111998	-0.141179	0.140952	Raster	6 Hz	33 μm	~3 J.cm-2	22-03-2018
91500_19	-0.0108452	0.118046	0.0479661	0.144466	Raster	6 Hz	33 μm	~3 J.cm-2	22-03-2018
91500_20	-0.00989913	0.0935104	0.070272	0.128703	Raster	6 Hz	33 μm	~3 J.cm-2	22-03-2018
91500_21	0.0526803	0.0992529	0.15494	0.129212	Raster	6 Hz	33 μm	~3 J.cm-2	22-03-2018
91500_22	0.0659127	0.100164	-0.0330478	0.12583	Raster	6 Hz	33 μm	~3 J.cm-2	22-03-2018
91500_23	-0.0809684	0.112828	-0.0322335	0.125137	Raster	6 Hz	33 μm	~3 J.cm-2	22-03-2018
91500_24	0.0916551	0.118657	0.0751457	0.115858	Raster	6 Hz	33 μm	~3 J.cm-2	22-03-2018
91500_25	-0.127037	0.123495	-0.12326	0.122722	Raster	6 Hz	33 μm	~3 J.cm-2	22-03-2018
91500_26	0.0105778	0.116	-0.0542842	0.118649	Raster	6 Hz	33 μm	~3 J.cm-2	22-03-2018
91500_27	0.025909	0.114694	-0.0274005	0.130466	Raster	6 Hz	33 μm	~3 J.cm-2	22-03-2018
91500_28	-0.0556069	0.104567	0.136492	0.128046	Raster	6 Hz	33 μm	~3 J.cm-2	22-03-2018
91500_29	-0.0134881	0.111278	-0.122896	0.137988	Raster	6 Hz	33 μm	~3 J.cm-2	22-03-2018
91500_30	-0.0502452	0.11214	0.0914155	0.141362	Raster	6 Hz	33 μm	~3 J.cm-2	22-03-2018
91500_31	0.0427905	0.107405	-0.0509103	0.143903	Raster	6 Hz	33 μm	~3 J.cm-2	22-03-2018
91500_32	-0.0263597	0.105144	-0.027643	0.141786	Raster	6 Hz	33 μm	~3 J.cm-2	22-03-2018
91500_33	-0.0121693	0.112899	0.104561	0.149961	Raster	6 Hz	33 μm	~3 J.cm-2	22-03-2018
91500_34	0.0608036	0.112727	-0.109601	0.146376	Raster	6 Hz	33 μm	~3 J.cm-2	22-03-2018
91500_35	-0.0768432	0.103	-0.0192293	0.138182	Raster	6 Hz	33 μm	~3 J.cm-2	22-03-2018
91500_36	0.0493064	0.100752	0.0640452	0.126961	Raster	6 Hz	33 μm	~3 J.cm-2	22-03-2018
91500_37	-0.0613035	0.101346	-0.0580594	0.113985	Raster	6 Hz	33 μm	~3 J.cm-2	22-03-2018
91500_38	0.0627337	0.113439	0.04263	0.141894	Raster	6 Hz	33 μm	~3 J.cm-2	22-03-2018
91500_39	-0.0800533	0.116594	0.0951876	0.148785	Raster	6 Hz	33 μm	~3 J.cm-2	22-03-2018
91500_40	0.0290562	0.121424	-0.192401	0.149912	Raster	6 Hz	33 μm	~3 J.cm-2	22-03-2018
91500_41	-0.0681575	0.119152	0.0730937	0.148651	Raster	6 Hz	33 μm	~3 J.cm-2	22-03-2018
91500_42	0.0521715	0.114683	-0.12071	0.155601	Raster	6 Hz	33 μm	~3 J.cm-2	22-03-2018
91500_43	-0.0205611	0.12668	0.102468	0.106544	Raster	6 Hz	33 μm	~3 J.cm-2	22-03-2018
91500_44	-0.00800536	0.120326	-0.108812	0.114437	Raster	6 Hz	33 μm	~3 J.cm-2	22-03-2018
91500_45	0.0339519	0.107146	0.160058	0.114086	Raster	6 Hz	33 μm	~3 J.cm-2	22-03-2018
91500_46	0.0131467	0.0981146	-0.10001	0.118104	Raster	6 Hz	33 μm	~3 J.cm-2	22-03-2018
91500_47	-0.0110124	0.108616	0.137353	0.117341	Raster	6 Hz	33 μm	~3 J.cm-2	22-03-2018
91500_48	-0.0149274	0.105783	-0.102258	0.118126	Raster	6 Hz	33 μm	~3 J.cm-2	22-03-2018
91500_49	0.0165736	0.0958241	-0.035349	0.132099	Raster	6 Hz	33 μm	~3 J.cm-2	22-03-2018
91500_50	-0.0180924	0.0993662	0.0639832	0.12399	Raster	6 Hz	33 μm	~3 J.cm-2	22-03-2018
91500_51	-0.0527731	0.102541	-0.184655	0.131428	Raster	6 Hz	33 μm	~3 J.cm-2	22-03-2018
91500_52	-0.0348447	0.108037	0.00357775	0.126347	Raster	6 Hz	33 μm	~3 J.cm-2	22-03-2018
91500_53	0.00757377	0.109843	-0.0395364	0.127117	Raster	6 Hz	33 μm	~3 J.cm-2	22-03-2018
91500_54	0.0257257	0.116293	0.0197596	0.124371	Raster	6 Hz	33 μm	~3 J.cm-2	22-03-2018
91500_55	-0.0445876	0.0999615	0.118925	0.111603	Raster	6 Hz	33 μm	~3 J.cm-2	22-03-2018
91500_56	0.0166012	0.101538	-0.0962443	0.116102	Raster	6 Hz	33 μm	~3 J.cm-2	22-03-2018
91500_57	0.0292539	0.104559	-0.0200486	0.112305	Raster	6 Hz	33 μm	~3 J.cm-2	22-03-2018
91500_58	-0.0203846	0.113037	0.0872059	0.110692	Raster	6 Hz	33 μm	~3 J.cm-2	22-03-2018
91500_59	-0.0207698	0.106999	-0.11815	0.101823	Raster	6 Hz	33 μm	~3 J.cm-2	22-03-2018
91500_60	0.0473115	0.111115	0.0489097	0.107193	Raster	6 Hz	33 μm	~3 J.cm-2	22-03-2018
91500_61	0.0317456	0.108105	0.0449925	0.133135	Raster	6 Hz	33 μm	~3 J.cm-2	22-03-2018
91500_62	0.0163884	0.106803	0.0383777	0.138066	Raster	6 Hz	33 μm	~3 J.cm-2	22-03-2018
91500_63	-0.0999414	0.115579	-0.15834	0.134332	Raster	6 Hz	33 μm	~3 J.cm-2	22-03-2018
91500_64	0.0207577	0.108508	0.0483387	0.148275	Raster	6 Hz	33 μm	~3 J.cm-2	22-03-2018
91500_65	-0.0632396	0.114358	-0.212139	0.14393	Raster	6 Hz	33 μm	~3 J.cm-2	22-03-2018
91500_66	0.0602937	0.109347	0.240735	0.144562	Raster	6 Hz	33 μm	~3 J.cm-2	22-03-2018
91500_67	-0.0105221	0.113267	-0.141526	0.14251	Raster	6 Hz	33 μm	~3 J.cm-2	22-03-2018
91500_68	0.0187913	0.112313	0.0426318	0.135892	Raster	6 Hz	33 μm	~3 J.cm-2	22-03-2018
91500_69	-0.0360706	0.118126	0.018088	0.140272	Raster	6 Hz	33 μm	~3 J.cm-2	22-03-2018
91500_70	0.00256904	0.11425	0.111444	0.131121	Raster	6 Hz	33 μm	~3 J.cm-2	22-03-2018
91500_71	-0.0131666	0.114439	-0.091843	0.145261	Raster	6 Hz	33 μm	~3 J.cm-2	22-03-2018
91500_72	0.00672799	0.115751	0.0617013	0.147158	Raster	6 Hz	33 μm	~3 J.cm-2	22-03-2018
91500_73	0.107657	0.119846	0.0768776	0.142641	Raster	6 Hz	33 μm	~3 J.cm-2	22-03-2018
91500_74	-0.101247	0.110828	-0.0983827	0.129401	Raster	6 Hz	33 μm	~3 J.cm-2	22-03-2018
91500_75	0.00800847	0.113514	-0.0265078	0.13394	Raster	6 Hz	33 μm	~3 J.cm-2	22-03-2018
91500_76	-0.0152652	0.103166	-0.0316573	0.13781	Raster	6 Hz	33 μm	~3 J.cm-2	22-03-2018
91500_77	-0.00603624	0.115083	0.0766664	0.143877	Raster	6 Hz	33 μm	~3 J.cm-2	22-03-2018
91500_78	0.0598554	0.114282	0.0178527	0.141914	Raster	6 Hz	33 μm	~3 J.cm-2	22-03-2018
91500_79	0.102661	0.0845676	0.0380658	0.106994	Raster	6 Hz	33 μm	~3 J.cm-2	26-07-2018
91500_80	-0.0694925	0.0906219	-0.0578007	0.112171	Raster	6 Hz	33 μm	~3 J.cm-2	26-07-2018
91500_81	0.0515763	0.0941337	0.19691	0.11994	Raster	6 Hz	33 μm	~3 J.cm-2	26-07-2018
91500_82	-0.0182366	0.101445	-0.0815783	0.123722	Raster	6 Hz	33 μm	~3 J.cm-2	26-07-2018
91500_83	0.000770979	0.0971947	-0.0924733	0.128778	Raster	6 Hz	33 μm	~3 J.cm-2	26-07-2018
91500_84	0.0194868	0.0978367	0.103029	0.126894	Raster	6 Hz	33 μm	~3 J.cm-2	26-07-2018
91500_85	-0.0426734	0.101498	-0.0904678	0.12816	Raster	6 Hz	33 μm	~3 J.cm-2	26-07-2018
91500_86	0.0753665	0.0935153	0.0696966	0.136967	Raster	6 Hz	33 μm	~3 J.cm-2	26-07-2018
91500_87	-0.0187267	0.0923684	0.0136566	0.13488	Raster	6 Hz	33 μm	~3 J.cm-2	26-07-2018
91500_88	-0.0186175	0.0991488	-0.0527582	0.131718	Raster	6 Hz	33 μm	~3 J.cm-2	26-07-2018
91500_89	-0.0311663	0.0891143	0.0444066	0.110561	Raster	6 Hz	33 μm	~3 J.cm-2	26-07-2018
91500_90	0.051811	0.0936056	-0.152538	0.11573	Raster	6 Hz	33 μm	~3 J.cm-2	26-07-2018
91500_91	-0.0631635	0.0962412	0.183919	0.115608	Raster	6 Hz	33 μm	~3 J.cm-2	26-07-2018
91500_92	0.0164082	0.0957012	-0.141392	0.116257	Raster	6 Hz	33 μm	~3 J.cm-2	26-07-2018
91500_93	0.00827655	0.0862593	0.106525	0.104548	Raster	6 Hz	33 μm	~3 J.cm-2	26-07-2018
91500_94	-0.0409083	0.0893601	0.0182975	0.126657	Raster	6 Hz	33 μm	~3 J.cm-2	26-07-2018
91500_95	-0.00152803	0.10035	-0.0071103	0.1144	Raster	6 Hz	33 μm	~3 J.cm-2	26-07-2018
91500_96	0.0497563	0.0973629	0.0369002	0.113097	Raster	6 Hz	33 μm	~3 J.cm-2	26-07-2018
91500_97	-0.0262228	0.0965357	-0.0312737	0.121152	Raster	6 Hz	33 μm	~3 J.cm-2	26-07-2018
91500_98	0.113767	0.10072	0.124254	0.118991	Raster	6 Hz	33 μm	~3 J.cm-2	26-07-2018
91500_99	0.030738	0.0978601	0.0923409	0.130632	Raster	6 Hz	33 μm	~3 J.cm-2	26-07-2018
91500_100	-0.100316	0.101989	-0.136757	0.122313	Raster	6 Hz	33 μm	~3 J.cm-2	26-07-2018
91500_101	-0.0346546	0.0840289	-0.0356328	0.105839	Raster	6 Hz	33 μm	~3 J.cm-2	26-07-2018
91500_102	0.008312	0.0854248	-0.0453418	0.0983076	Raster	6 Hz	33 μm	~3 J.cm-2	26-07-2018
91500_103	-0.0295534	0.0857013	0.0402627	0.108948	Raster	6 Hz	33 μm	~3 J.cm-2	26-07-2018
91500_104	0.092584	0.0868814	0.103813	0.116151	Raster	6 Hz	33 μm	~3 J.cm-2	26-07-2018
91500_105	-0.0197189	0.0786089	-0.00604543	0.120995	Raster	6 Hz	33 μm	~3 J.cm-2	26-07-2018
91500_106	0.013835	0.0766404	-0.0216825	0.110383	Raster	6 Hz	33 μm	~3 J.cm-2	26-07-2018
91500_107	-0.0571967	0.0787984	0.0190011	0.102226	Raster	6 Hz	33 μm	~3 J.cm-2	26-07-2018
91500_108	0.0999607	0.0883531	-0.0191717	0.106581	Raster	6 Hz	33 μm	~3 J.cm-2	26-07-2018
91500_109	-0.0320785	0.0944755	-0.0484748	0.12711	Raster	6 Hz	33 μm	~3 J.cm-2	27-07-2018
91500_110	-0.0236485	0.103321	0.114419	0.104429	Raster	6 Hz	33 μm	~3 J.cm-2	27-07-2018
91500_111	-0.0452795	0.108632	-0.233572	0.111575	Raster	6 Hz	33 μm	~3 J.cm-2	27-07-2018
91500_112	-0.0569325	0.104574	-0.0729189	0.110896	Raster	6 Hz	33 μm	~3 J.cm-2	27-07-2018
91500_113	0.122355	0.111109	0.192604	0.12782	Raster	6 Hz	33 μm	~3 J.cm-2	27-07-2018
91500_114	-0.0854643	0.101732	0.000338059	0.12698	Raster	6 Hz	33 μm	~3 J.cm-2	27-07-2018
91500_115	0.113485	0.100722	-0.00908429	0.134202	Raster	6 Hz	33 μm	~3 J.cm-2	27-07-2018
91500_116	0.0598862	0.0861363	0.0998673	0.121387	Raster	6 Hz	33 μm	~3 J.cm-2	27-07-2018
91500_117	-0.0464613	0.0842616	-0.0650722	0.127852	Raster	6 Hz	33 μm	~3 J.cm-2	27-07-2018
91500_118	0.0247551	0.0857048	0.140451	0.111867	Raster	6 Hz	33 μm	~3 J.cm-2	27-07-2018
91500_119	0.0125963	0.0915858	0.0893464	0.114734	Raster	6 Hz	33 μm	~3 J.cm-2	27-07-2018
91500_120	-0.0829412	0.085868	-0.00900459	0.104633	Raster	6 Hz	33 μm	~3 J.cm-2	27-07-2018
91500_121	0.0500891	0.0847281	0.0269551	0.0914231	Raster	6 Hz	33 μm	~3 J.cm-2	27-07-2018
91500_122	-0.000598058	0.0820641	-0.102799	0.0957771	Raster	6 Hz	33 μm	~3 J.cm-2	27-07-2018
91500_123	0.00682761	0.0828431	0.0589281	0.0935866	Raster	6 Hz	33 μm	~3 J.cm-2	27-07-2018
91500_124	-0.00888121	0.0809182	0.0401561	0.105946	Raster	6 Hz	33 μm	~3 J.cm-2	27-07-2018
91500_125	-0.00119843	0.0837048	0.00474966	0.112729	Raster	6 Hz	33 μm	~3 J.cm-2	27-07-2018
91500_126	0.0267412	0.0816283	-0.0300278	0.120308	Raster	6 Hz	33 μm	~3 J.cm-2	27-07-2018
91500_127	-0.0292358	0.0896719	-0.0810479	0.117269	Raster	6 Hz	33 μm	~3 J.cm-2	27-07-2018
91500_128	-0.0275831	0.0882493	0.0492645	0.107119	Raster	6 Hz	33 μm	~3 J.cm-2	27-07-2018
91500_129	-0.152298	0.0923141	-0.325759	0.122233	Raster	6 Hz	33 μm	~3 J.cm-2	27-07-2018
91500_130	0.0717288	0.0962785	0.150137	0.126625	Raster	6 Hz	33 μm	~3 J.cm-2	27-07-2018
91500_131	-0.104863	0.0919603	-0.130168	0.127897	Raster	6 Hz	33 μm	~3 J.cm-2	27-07-2018
91500_132	0.0091216	0.0844685	-0.0276815	0.126429	Raster	6 Hz	33 μm	~3 J.cm-2	27-07-2018
91500_133	-0.0606787	0.0904961	-0.162551	0.133557	Raster	6 Hz	33 μm	~3 J.cm-2	27-07-2018
91500_134	0.0407817	0.0923879	0.103005	0.135296	Raster	6 Hz	33 μm	~3 J.cm-2	27-07-2018
91500_135	-0.0113608	0.0975108	0.0634327	0.130366	Raster	6 Hz	33 μm	~3 J.cm-2	27-07-2018
91500_136	0.0155385	0.0825678	-0.0796209	0.0966837	Raster	6 Hz	33 μm	~3 J.cm-2	27-07-2018
91500_137	-0.104697	0.0905649	0.0733904	0.101729	Raster	6 Hz	33 μm	~3 J.cm-2	27-07-2018
91500_138	-0.0750137	0.102228	-0.087176	0.116911	Raster	6 Hz	33 μm	~3 J.cm-2	21-01-2019
91500_139	0.0125749	0.105578	0.00819073	0.12269	Raster	6 Hz	33 μm	~3 J.cm-2	21-01-2019
91500_140	0.0347743	0.108173	0.0340298	0.119879	Raster	6 Hz	33 μm	~3 J.cm-2	21-01-2019
91500_141	-0.0750731	0.105419	0.0213226	0.117263	Raster	6 Hz	33 μm	~3 J.cm-2	21-01-2019
91500_142	-0.0164962	0.116044	-0.105405	0.122498	Raster	6 Hz	33 μm	~3 J.cm-2	21-01-2019
91500_143	0.0099563	0.114708	-0.0738061	0.126408	Raster	6 Hz	33 μm	~3 J.cm-2	21-01-2019
91500_144	-0.0625386	0.111654	-0.162229	0.133609	Raster	6 Hz	33 μm	~3 J.cm-2	21-01-2019
91500_145	0.000293321	0.0994184	0.174533	0.126246	Raster	6 Hz	33 μm	~3 J.cm-2	21-01-2019
91500_146	0.0251746	0.102108	0.135104	0.127878	Raster	6 Hz	33 μm	~3 J.cm-2	21-01-2019
91500_147	0.0950643	0.116525	-0.055411	0.129361	Raster	6 Hz	33 μm	~3 J.cm-2	21-01-2019
91500_148	-0.105933	0.125094	-0.0876754	0.142865	Raster	6 Hz	33 μm	~3 J.cm-2	21-01-2019
91500_149	0.0933797	0.127814	0.0340534	0.150414	Raster	6 Hz	33 μm	~3 J.cm-2	21-01-2019
91500_150	-0.0955033	0.12045	-0.0570047	0.155471	Raster	6 Hz	33 μm	~3 J.cm-2	21-01-2019
91500_151	-0.00670893	0.118113	0.0508641	0.160563	Raster	6 Hz	33 μm	~3 J.cm-2	21-01-2019
91500_152	0.102307	0.10292	-0.0537631	0.110828	Raster	6 Hz	33 μm	~3 J.cm-2	21-01-2019
91500_153	-0.073552	0.0972845	0.0421094	0.121665	Raster	6 Hz	33 μm	~3 J.cm-2	21-01-2019
91500_154	0.144852	0.0917292	-0.0161093	0.125851	Raster	6 Hz	33 μm	~3 J.cm-2	21-01-2019
91500_155	-0.184639	0.0931716	0.0181375	0.126314	Raster	6 Hz	33 μm	~3 J.cm-2	21-01-2019
91500_156	0.120226	0.0935275	0.0235695	0.11867	Raster	6 Hz	33 μm	~3 J.cm-2	21-01-2019
91500_157	-0.0123208	0.0959671	-0.0997958	0.118958	Raster	6 Hz	33 μm	~3 J.cm-2	21-01-2019
91500_158	-0.00379896	0.0878625	0.109431	0.114906	Raster	6 Hz	33 μm	~3 J.cm-2	21-01-2019
91500_159	-0.0747959	0.086917	0.00327928	0.118393	Raster	6 Hz	33 μm	~3 J.cm-2	21-01-2019
91500_160	-0.0369004	0.0887103	-0.188387	0.11354	Raster	6 Hz	33 μm	~3 J.cm-2	21-01-2019
91500_161	0.038944	0.0834227	0.0742425	0.115515	Raster	6 Hz	33 μm	~3 J.cm-2	21-01-2019
91500_162	0.0939106	0.0911861	0.0781557	0.118399	Raster	6 Hz	33 μm	~3 J.cm-2	21-01-2019
91500_163	-0.100342	0.0885977	-0.0968156	0.110053	Raster	6 Hz	33 μm	~3 J.cm-2	21-01-2019
91500_164	-0.0569129	0.0993951	-0.0910642	0.113209	Raster	6 Hz	33 μm	~3 J.cm-2	21-01-2019
91500_165	0.0558766	0.0989917	-0.0342428	0.125595	Raster	6 Hz	33 μm	~3 J.cm-2	21-01-2019
91500_166	-0.0426416	0.102358	-0.162725	0.134416	Raster	6 Hz	33 μm	~3 J.cm-2	21-01-2019
91500_167	-0.104676	0.0963978	-0.152847	0.135026	Raster	6 Hz	33 μm	~3 J.cm-2	21-01-2019
91500_168	-0.158167	0.0983591	-0.0855419	0.124001	Raster	6 Hz	33 μm	~3 J.cm-2	21-01-2019
91500_169	0.209557	0.0987369	0.184452	0.121124	Raster	6 Hz	33 μm	~3 J.cm-2	21-01-2019
91500_170	0.0436264	0.111888	0.303272	0.130347	Raster	6 Hz	33 μm	~3 J.cm-2	21-01-2019
91500_171	0.0352996	0.110485	-0.0841172	0.123705	Raster	6 Hz	33 μm	~3 J.cm-2	21-01-2019
91500_172	-0.112507	0.107249	-0.237436	0.128543	Raster	6 Hz	33 μm	~3 J.cm-2	21-01-2019
91500_173	-0.0710998	0.0951774	-0.0608897	0.126749	Raster	6 Hz	33 μm	~3 J.cm-2	21-01-2019
91500_174	0.0129263	0.107695	-0.0469117	0.128526	Raster	6 Hz	33 μm	~3 J.cm-2	21-01-2019
91500_175	0.000955008	0.108995	0.125664	0.124241	Raster	6 Hz	33 μm	~3 J.cm-2	21-01-2019
91500_176	-0.0214893	0.109526	-0.104748	0.12561	Raster	6 Hz	33 μm	~3 J.cm-2	21-01-2019
91500_177	-0.0116656	0.0984942	-0.137085	0.123704	Raster	6 Hz	33 μm	~3 J.cm-2	21-01-2019
91500_178	-0.052882	0.107639	0.00932094	0.131243	Raster	6 Hz	33 μm	~3 J.cm-2	21-01-2019
91500_179	0.00414405	0.10354	0.040258	0.130302	Raster	6 Hz	33 μm	~3 J.cm-2	21-01-2019
91500_180	-7.1055e-05	0.102932	-0.0509092	0.131108	Raster	6 Hz	33 μm	~3 J.cm-2	21-01-2019
91500_181	0.0567266	0.097464	0.049494	0.126945	Raster	6 Hz	33 μm	~3 J.cm-2	21-01-2019
91500_182	-0.0218802	0.107248	0.128481	0.139067	Raster	6 Hz	33 μm	~3 J.cm-2	21-01-2019
91500_183	0.127629	0.11508	0.0233864	0.147779	Raster	6 Hz	33 μm	~3 J.cm-2	21-01-2019
91500_184	-0.0976788	0.116387	-0.0488478	0.148173	Raster	6 Hz	33 μm	~3 J.cm-2	21-01-2019
91500_185	-0.0125538	0.119009	-0.0327568	0.142902	Raster	6 Hz	33 μm	~3 J.cm-2	21-01-2019
91500_186	0.0262451	0.118822	0.0474186	0.130411	Raster	6 Hz	33 μm	~3 J.cm-2	21-01-2019
91500_187	-0.127161	0.0981678	-0.145257	0.129938	Raster	6 Hz	33 μm	~3 J.cm-2	22-01-2019
91500_188	-0.0492104	0.082297	-0.118146	0.0964384	Raster	6 Hz	33 μm	~3 J.cm-2	22-01-2019
91500_189	-0.149259	0.102016	-0.148714	0.131431	Raster	6 Hz	33 μm	~3 J.cm-2	22-01-2019
91500_190	0.0102111	0.0841194	0.0759815	0.114816	Raster	6 Hz	33 μm	~3 J.cm-2	22-01-2019
91500_191	-3.4861e-05	0.0987688	-0.430509	0.122961	Raster	6 Hz	33 μm	~3 J.cm-2	22-01-2019
91500_192	0.0125134	0.0885286	-0.0239161	0.115367	Raster	6 Hz	33 μm	~3 J.cm-2	22-01-2019
91500_193	-0.0458493	0.0987817	-0.0539482	0.116608	Raster	6 Hz	33 μm	~3 J.cm-2	22-01-2019
91500_194	0.0960257	0.102943	0.136657	0.115891	Raster	6 Hz	33 μm	~3 J.cm-2	22-01-2019
91500_195	-0.0187942	0.0899494	0.0444152	0.111643	Raster	6 Hz	33 μm	~3 J.cm-2	22-01-2019
91500_196	-0.0552211	0.103337	-0.179679	0.118639	Raster	6 Hz	33 μm	~3 J.cm-2	22-01-2019
91500_197	0.00461797	0.0961436	-0.101372	0.121856	Raster	6 Hz	33 μm	~3 J.cm-2	22-01-2019
91500_198	-0.0805784	0.0958236	-0.00924049	0.127304	Raster	6 Hz	33 μm	~3 J.cm-2	22-01-2019
91500_199	0.000837375	0.0856624	-0.240357	0.135385	Raster	6 Hz	33 μm	~3 J.cm-2	22-01-2019
91500_200	-0.018543	0.095812	0.0924479	0.134688	Raster	6 Hz	33 μm	~3 J.cm-2	22-01-2019
91500_201	-0.0186424	0.0992856	0.0132148	0.122777	Raster	6 Hz	33 μm	~3 J.cm-2	22-01-2019
91500_202	-0.0263764	0.0962859	-0.0448631	0.120993	Raster	6 Hz	33 μm	~3 J.cm-2	22-01-2019
91500_203	-0.0365293	0.0925736	-0.120997	0.119321	Raster	6 Hz	33 μm	~3 J.cm-2	22-01-2019
91500_204	0.116281	0.0947393	0.137044	0.120591	Raster	6 Hz	33 μm	~3 J.cm-2	22-01-2019
91500_205	-0.0381078	0.0931737	-0.00339025	0.11646	Raster	6 Hz	33 μm	~3 J.cm-2	22-01-2019
91500_206	-0.018624	0.102146	0.0436212	0.130266	Raster	6 Hz	33 μm	~3 J.cm-2	22-01-2019
91500_207	-0.00121219	0.095937	-0.102144	0.124637	Raster	6 Hz	33 μm	~3 J.cm-2	22-01-2019
91500_208	0.0119978	0.0999301	0.0244796	0.127105	Raster	6 Hz	33 μm	~3 J.cm-2	22-01-2019
91500_209	-0.0531911	0.0924216	0.0201283	0.106784	Raster	6 Hz	33 μm	~3 J.cm-2	22-01-2019
91500_210	-0.0443095	0.0941595	-0.0141123	0.124596	Raster	6 Hz	33 μm	~3 J.cm-2	22-01-2019
91500_211	-0.0478192	0.102596	-0.0248178	0.123636	Raster	6 Hz	33 μm	~3 J.cm-2	22-01-2019
91500_212	0.0369749	0.108499	0.0651575	0.122529	Raster	6 Hz	33 μm	~3 J.cm-2	22-01-2019
91500_213	-0.000681854	0.105009	0.0244856	0.11956	Raster	6 Hz	33 μm	~3 J.cm-2	22-01-2019
91500_214	0.0696951	0.0961163	-0.0387972	0.120807	Raster	6 Hz	33 μm	~3 J.cm-2	22-01-2019
91500_215	-0.115392	0.100788	-0.0883153	0.115376	Raster	6 Hz	33 μm	~3 J.cm-2	22-01-2019
91500_216	-0.0197646	0.101344	-0.057176	0.125893	Raster	6 Hz	33 μm	~3 J.cm-2	22-01-2019
91500_217	0.00426879	0.100805	-0.00600485	0.125522	Raster	6 Hz	33 μm	~3 J.cm-2	22-01-2019
91500_218	-0.00123373	0.10072	0.0593934	0.123332	Raster	6 Hz	33 μm	~3 J.cm-2	22-01-2019
91500_219	0.036541	0.0985722	-0.0713163	0.113607	Raster	6 Hz	33 μm	~3 J.cm-2	22-01-2019
91500_220	0.0150611	0.105405	0.163043	0.117174	Raster	6 Hz	33 μm	~3 J.cm-2	22-01-2019
91500_221	0.00278753	0.101043	0.0240916	0.127911	Raster	6 Hz	33 μm	~3 J.cm-2	22-01-2019
