# Supplementary material for: Silicon isotope measurement in zircon by laser ablation multiple collector inductively coupled plasma mass spectrometry
Source: Royal Society of Chemistry journal article supplement (doi:10.1039/d0ja00214c), 2020-01-01
Supplement: d0ja00214c4.xlsx [file d0ja00214c4.xlsx]

## Sheet: Zircon standards
Table S4. All Si isotope data for zircon analyzed by LA-MC-ICP-MS in line mode
Standard name	δ29Si*	2SE	δ30Si*	2SE	δ29Si**	2SE	δ30Si**	2SE	Date
91500-1 (other crystal)	-0.021383	0.0913889	-0.14569	0.137374	-0.221379	0.0913889	-0.505638	0.137374	27-07-2018
91500-2 (other crystal)	0.0887825	0.0936262	0.040916	0.130299	-0.111235	0.0936262	-0.319099	0.130299	27-07-2018
91500-3 (other crystal)	0.0156415	0.092768	0.076981	0.120616	-0.184362	0.092768	-0.283047	0.120616	27-07-2018
91500-4 (other crystal)	0.0556439	0.0991576	0.0952559	0.123708	-0.144367	0.0991576	-0.264778	0.123708	27-07-2018
91500-5 (other crystal)	0.0970105	0.0995164	0.155271	0.117672	-0.103009	0.0995164	-0.204785	0.117672	21-01-2019
AS3-1	-0.0844565	0.10421	-0.237959	0.124874	-0.28444	0.10421	-0.597873	0.124874	22-03-2018
AS3-2	-0.0924815	0.0923497	-0.200823	0.124758	-0.292463	0.0923497	-0.56075	0.124758	22-01-2019
AS3-3	-0.109447	0.0846108	-0.200773	0.10398	-0.309425	0.0846108	-0.560701	0.10398	22-01-2019
AS3-4	-0.0394563	0.0916671	-0.198197	0.104591	-0.239448	0.0916671	-0.558125	0.104591	26-07-2018
AS3-5	-0.0965795	0.0862453	-0.185593	0.121467	-0.29656	0.0862453	-0.545526	0.121467	26-07-2018
AS3-6	-0.101547	0.0891418	-0.184364	0.103762	-0.301527	0.0891418	-0.544297	0.103762	22-01-2019
AS3-7	-0.0495029	0.0982747	-0.179032	0.108786	-0.249493	0.0982747	-0.538967	0.108786	22-03-2018
AS3-8	-0.032123	0.0984199	-0.176587	0.12397	-0.232117	0.0984199	-0.536524	0.12397	22-01-2019
AS3-9	-0.014335	0.0869049	-0.176337	0.112647	-0.214332	0.0869049	-0.536274	0.112647	26-07-2018
AS3-10	-0.116183	0.0943979	-0.165341	0.10917	-0.31616	0.0943979	-0.525282	0.10917	22-01-2019
AS3-11	-0.115446	0.0907607	-0.147235	0.122526	-0.315423	0.0907607	-0.507182	0.122526	22-01-2019
AS3-12	-0.0208123	0.101695	-0.136176	0.127654	-0.220808	0.101695	-0.496127	0.127654	22-01-2019
AS3-13	-0.0152357	0.108716	-0.12637	0.120247	-0.215233	0.108716	-0.486324	0.120247	22-03-2018
AS3-14	-0.106455	0.110855	-0.115471	0.161176	-0.306434	0.110855	-0.475429	0.161176	22-03-2018
AS3-15	-0.101109	0.114425	-0.10789	0.132825	-0.301089	0.114425	-0.467851	0.132825	21-01-2019
AS3-16	-0.0968132	0.0974404	-0.094287	0.133447	-0.296794	0.0974404	-0.454253	0.133447	22-01-2019
AS3-17	-0.0998502	0.112145	-0.0757614	0.139178	-0.29983	0.112145	-0.435734	0.139178	22-03-2018
AS3-18	-0.0266997	0.0844646	-0.0617856	0.111736	-0.226694	0.0844646	-0.421763	0.111736	26-07-2018
AS3-19	-0.134051	0.103171	-0.0532622	0.131404	-0.334024	0.103171	-0.413243	0.131404	22-01-2019
AS3-20	-0.0139724	0.109666	-0.0302318	0.14648	-0.21397	0.109666	-0.390221	0.14648	22-03-2018
AS3-21	-0.053656	0.117185	-0.00665992	0.143098	-0.253645	0.117185	-0.366658	0.143098	22-03-2018
AS3-22	-0.00509427	0.0859129	-0.00198462	0.10527	-0.205093	0.0859129	-0.361984	0.10527	26-07-2018
AS3-23	-0.098271	0.110858	0.0571184	0.123644	-0.298251	0.110858	-0.302902	0.123644	21-01-2019
AS3-24	-0.00673817	0.0894731	0.0953653	0.110397	-0.206737	0.0894731	-0.264669	0.110397	22-01-2019
AS3-25	-0.0414621	0.10796	0.105986	0.158319	-0.241454	0.10796	-0.254052	0.158319	22-03-2018
AS3-26	0.105112	0.101721	0.106137	0.126231	-0.0949086	0.101721	-0.253902	0.126231	22-01-2019
AS3-27	0.0742321	0.100069	0.111721	0.120603	-0.125783	0.100069	-0.248319	0.120603	22-01-2019
AS3-28	0.0982548	0.110799	0.168995	0.128058	-0.101765	0.110799	-0.191066	0.128058	21-01-2019
KIM-1	-0.107343	0.112556	-0.287165	0.146535	-0.307322	0.112556	-0.647061	0.146535	21-01-2019
KIM-2	-0.0308128	0.11319	-0.244181	0.145531	-0.230807	0.11319	-0.604093	0.145531	21-01-2019
KIM-3	-0.14353	0.118399	-0.192937	0.122596	-0.343501	0.118399	-0.552867	0.122596	21-01-2019
KIM-4	-0.0563988	0.103184	-0.0865101	0.127062	-0.256387	0.103184	-0.446479	0.127062	21-01-2019
KIM-5	0.113614	0.0989944	-0.0723364	0.140479	-0.086409	0.0989944	-0.43231	0.140479	21-01-2019
KIM-6	-0.0177186	0.099472	-0.0533576	0.131035	-0.217715	0.099472	-0.413338	0.131035	21-01-2019
KIM-7	-0.0408778	0.128619	-0.0395454	0.158188	-0.24087	0.128619	-0.399531	0.158188	21-01-2019
KIM-8	-0.0218229	0.128824	-0.0256566	0.158893	-0.221818	0.128824	-0.385647	0.158893	21-01-2019
KIM-9	-0.0704172	0.0966572	-0.0120651	0.112099	-0.270403	0.0966572	-0.372061	0.112099	21-01-2019
KIM-10	-0.000300408	0.104807	-0.000784367	0.112511	-0.2003	0.104807	-0.360784	0.112511	21-01-2019
KIM-11	0.0626455	0.100271	0.0027509	0.111265	-0.137367	0.100271	-0.35725	0.111265	21-01-2019
KIM-12	0.0419337	0.116418	0.0481612	0.138288	-0.158075	0.116418	-0.311856	0.138288	21-01-2019
KIM-13	0.128637	0.0990365	0.0709414	0.120515	-0.0713886	0.0990365	-0.289084	0.120515	21-01-2019
KIM-14	-0.0128705	0.103663	0.0829681	0.123052	-0.212868	0.103663	-0.277062	0.123052	21-01-2019
KIM-15	0.177487	0.0992038	0.095935	0.122995	-0.022548	0.0992038	-0.2641	0.122995	21-01-2019
KIM-16	-0.00335492	0.111226	0.0998371	0.139304	-0.203354	0.111226	-0.260199	0.139304	21-01-2019
Kuehl Lake-1	-0.0221779	0.112808	-0.0508273	0.14463	-0.222174	0.14463	-0.410809	0.14463	21-01-2019
Kuehl Lake-2	-0.0565586	0.109089	-0.0234663	0.122817	-0.256547	0.109089	-0.383458	0.122817	21-01-2019
Kuehl Lake-3	-0.084759	0.106522	0.00029479	0.11758	-0.284742	0.106522	-0.359705	0.11758	21-01-2019
MudTank-1	-0.106102	0.102884	-0.243852	0.137344	-0.306081	0.102884	-0.603764	0.137344	22-03-2018
MudTank-2	-0.1603	0.0978613	-0.218295	0.134682	-0.360268	0.0978613	-0.578216	0.134682	22-03-2018
MudTank-3	-0.0317529	0.0851581	-0.189966	0.110188	-0.231747	0.0851581	-0.549897	0.110188	26-07-2018
MudTank-4	-0.0113758	0.100839	-0.167778	0.126372	-0.211373	0.100839	-0.527717	0.126372	22-03-2018
MudTank-5	-0.00461402	0.101703	-0.165307	0.125863	-0.204613	0.101703	-0.525247	0.125863	22-03-2018
MudTank-6	-0.0186132	0.113769	-0.121617	0.150633	-0.218609	0.113769	-0.481573	0.150633	22-03-2018
MudTank-7	-0.0903426	0.119069	-0.115608	0.129448	-0.290325	0.119069	-0.475566	0.129448	22-03-2018
MudTank-8	-0.0509929	0.104187	-0.113057	0.129536	-0.250983	0.104187	-0.473016	0.129536	22-03-2018
MudTank-9	0.00230395	0.092008	-0.0630489	0.105975	-0.197697	0.092008	-0.423026	0.105975	22-03-2018
MudTank-10	-0.058054	0.0916125	-0.0567649	0.116155	-0.258042	0.0916125	-0.416744	0.116155	26-07-2018
MudTank-11	0.0375378	0.108194	-0.0318522	0.130771	-0.16247	0.108194	-0.391841	0.130771	22-03-2018
MudTank-12	0.0238701	0.0919621	-0.0221028	0.109311	-0.176135	0.0919621	-0.382095	0.109311	26-07-2018
MudTank-13	0.0403299	0.0825225	0.0625903	0.0993841	-0.159678	0.0825225	-0.297432	0.0993841	26-07-2018
MUN-0-1	-0.780704	0.0851976	-1.50613	0.102189	-0.980548	0.0851976	-1.80568	0.102189	27-07-2018
MUN-0-2	-0.805325	0.104987	-1.49287	0.130884	-1.00516	0.104987	-1.79242	0.130884	27-07-2018
MUN-0-3	-0.749371	0.088654	-1.42932	0.115047	-0.949221	0.088654	-1.72889	0.115047	27-07-2018
MUN-0-4	-0.645651	0.103847	-1.41145	0.118453	-0.845522	0.103847	-1.71103	0.118453	27-07-2018
MUN-0-5	-0.632679	0.100369	-1.41114	0.127975	-0.832552	0.100369	-1.71071	0.127975	27-07-2018
MUN-0-6	-0.704355	0.0913259	-1.38064	0.108273	-0.904214	0.0913259	-1.68023	0.108273	26-07-2018
MUN-0-7	-0.69433	0.0836979	-1.36763	0.109157	-0.894191	0.0836979	-1.66722	0.109157	27-07-2018
MUN-0-8	-0.605267	0.0899703	-1.34572	0.113019	-0.805146	0.0899703	-1.64532	0.113019	26-07-2018
MUN-0-9	-0.679674	0.101025	-1.33691	0.112926	-0.879538	0.101025	-1.63651	0.112926	27-07-2018
MUN-0-10	-0.695723	0.0958208	-1.32485	0.126498	-0.895584	0.0958208	-1.62446	0.126498	27-07-2018
MUN-0-11	-0.584187	0.0931772	-1.32102	0.0998721	-0.78407	0.0931772	-1.62062	0.0998721	26-07-2018
MUN-0-12	-0.721879	0.0849689	-1.29777	0.1191	-0.921735	0.0849689	-1.59738	0.1191	26-07-2018
MUN-0-13	-0.610788	0.0788819	-1.2974	0.107402	-0.810666	0.0788819	-1.59701	0.107402	26-07-2018
MUN-0-14	-0.680049	0.0797499	-1.2846	0.0958545	-0.879913	0.0797499	-1.58422	0.0958545	27-07-2018
MUN-1-1	-0.88394	0.106715	-1.79323	0.13652	-1.08376	0.106715	-2.15258	0.13652	22-03-2018
MUN-1-2	-0.963883	0.12201	-1.73348	0.136325	-1.16369	0.12201	-2.09285	0.136325	22-03-2018
MUN-1-3	-0.776445	0.120178	-1.69013	0.134741	-0.976289	0.120178	-2.04952	0.134741	22-03-2018
MUN-1-4	-0.856949	0.112436	-1.65121	0.129717	-1.05678	0.112436	-2.01061	0.129717	22-03-2018
MUN-1-5	-0.839204	0.090801	-1.6417	0.119423	-1.03904	0.090801	-2.00111	0.119423	22-03-2018
MUN-1-6	-0.817311	0.0958819	-1.6264	0.129691	-1.01715	0.0958819	-1.98582	0.129691	22-03-2018
MUN-1-7	-0.765002	0.115665	-1.58314	0.117347	-0.964849	0.115665	-1.94257	0.117347	22-03-2018
MUN-1-8	-0.647979	0.116335	-1.42326	0.132442	-0.847849	0.116335	-1.78274	0.132442	22-03-2018
MUN-3-1	-0.854075	0.104962	-1.83051	0.117438	-1.0539	0.104962	-2.18985	0.117438	22-03-2018
MUN-3-2	-0.793167	0.112838	-1.74477	0.130747	-0.993008	0.112838	-2.10415	0.130747	22-03-2018
MUN-3-3	-0.85863	0.109717	-1.71163	0.145313	-1.05846	0.109717	-2.07101	0.145313	22-03-2018
MUN-3-4	-0.779206	0.096053	-1.61188	0.124904	-0.97905	0.096053	-1.9713	0.124904	22-03-2018
MUN-3-5	-0.773918	0.104902	-1.5758	0.127604	-0.973763	0.104902	-1.93523	0.127604	22-03-2018
MUN-3-6	-0.702101	0.110093	-1.49026	0.137772	-0.901961	0.110093	-1.84973	0.137772	22-03-2018
MUN-3-7	-0.748527	0.127722	-1.41552	0.132404	-0.948377	0.127722	-1.77501	0.132404	22-03-2018
MUN-3-8	-0.668024	0.0779675	-1.36809	0.0961081	-0.867891	0.0779675	-1.7276	0.0961081	26-07-2018
MUN-3-9	-0.679423	0.0839032	-1.34379	0.106392	-0.879287	0.0839032	-1.70331	0.106392	26-07-2018
MUN-3-10	-0.672642	0.0889259	-1.32761	0.112631	-0.872508	0.0889259	-1.68713	0.112631	26-07-2018
MUN-4-1	-0.95366	0.111209	-1.93395	0.13159	-1.15347	0.111209	-2.29326	0.13159	21-01-2019
MUN-4-2	-0.899552	0.0884383	-1.90387	0.115648	-1.09937	0.0884383	-2.26318	0.115648	22-01-2019
MUN-4-3	-0.912748	0.0896765	-1.88079	0.116059	-1.11257	0.0896765	-2.24012	0.116059	22-03-2018
MUN-4-4	-0.983698	0.0937681	-1.85503	0.127022	-1.1835	0.0937681	-2.21436	0.127022	22-01-2019
MUN-4-5	-0.900269	0.110502	-1.84211	0.120246	-1.10009	0.110502	-2.20145	0.120246	22-03-2018
MUN-4-6	-0.854225	0.111799	-1.84085	0.141989	-1.05405	0.111799	-2.20019	0.141989	22-03-2018
MUN-4-7	-0.862417	0.111579	-1.83835	0.144628	-1.06224	0.111579	-2.19769	0.144628	22-03-2018
MUN-4-8	-0.919986	0.105867	-1.78035	0.13546	-1.1198	0.105867	-2.13971	0.13546	21-01-2019
MUN-4-9	-0.749987	0.112857	-1.76204	0.126836	-0.949837	0.112857	-2.12141	0.126836	21-01-2019
MUN-4-10	-0.919519	0.0954632	-1.75268	0.117768	-1.11934	0.0954632	-2.11205	0.117768	22-01-2019
MUN-4-11	-0.826389	0.0889159	-1.72652	0.113832	-1.02622	0.0889159	-2.08589	0.113832	21-01-2019
MUN-4-12	-0.794816	0.116813	-1.70049	0.128177	-0.994657	0.116813	-2.05988	0.128177	22-03-2018
MUN-4-13	-0.896087	0.115045	-1.69038	0.138898	-1.09591	0.115045	-2.04977	0.138898	22-03-2018
MUN-4-14	-0.926192	0.103945	-1.67319	0.117109	-1.12601	0.103945	-2.03259	0.117109	22-01-2019
MUN-4-15	-0.808311	0.101515	-1.64586	0.10014	-1.00815	0.101515	-2.00527	0.10014	22-01-2019
MUN-4-16	-0.78072	0.0917543	-1.63837	0.114628	-0.980564	0.0917543	-1.99778	0.114628	21-01-2019
MUN-4-17	-0.824096	0.118216	-1.60809	0.139471	-1.02393	0.118216	-1.96751	0.139471	22-03-2018
MUN-4-18	-0.834658	0.0858678	-1.60623	0.118237	-1.03449	0.0858678	-1.96565	0.118237	22-01-2019
MUN-4-19	-0.859043	0.097669	-1.60612	0.109461	-1.05887	0.097669	-1.96554	0.109461	21-01-2019
MUN-4-20	-0.798458	0.100587	-1.59421	0.108798	-0.998298	0.100587	-1.95363	0.108798	22-01-2019
MUN-4-21	-0.85366	0.0935512	-1.52665	0.125103	-1.05349	0.0935512	-1.8861	0.125103	22-01-2019
MUN-4-22	-0.854812	0.0961189	-1.50333	0.133632	-1.05464	0.0961189	-1.86279	0.133632	21-01-2019
MUN-4-23	-0.697839	0.0887711	-1.47043	0.129544	-0.897699	0.0887711	-1.8299	0.129544	22-01-2019
MUN-4-24	-0.779074	0.100489	-1.45172	0.127705	-0.978918	0.100489	-1.81119	0.127705	22-01-2019
MUN-4-25	-0.674683	0.0893529	-1.3842	0.119765	-0.874548	0.0893529	-1.7437	0.119765	21-01-2019
Peixe-1	-0.125711	0.0893929	-0.241358	0.123532	-0.325686	0.0893929	-0.601271	0.123532	26-07-2018
Peixe-2	-0.0492144	0.0832053	-0.190583	0.107713	-0.249205	0.0832053	-0.550514	0.107713	26-07-2018
Peixe-3	-0.0457123	0.0918046	-0.149823	0.110023	-0.245703	0.0918046	-0.50977	0.110023	26-07-2018
Peixe-4	0.00238159	0.0860846	-0.0807051	0.131583	-0.197619	0.0860846	-0.440676	0.131583	22-03-2018
Peixe-5	-0.0677419	0.111026	-0.0779048	0.133973	-0.267728	0.111026	-0.437877	0.133973	22-03-2018
Peixe-6	0.0203205	0.106845	-0.0447232	0.131582	-0.179684	0.106845	-0.404707	0.131582	22-03-2018
Peixe-7	-0.0529374	0.11142	-0.0415598	0.129338	-0.252927	0.11142	-0.401545	0.129338	22-03-2018
Peixe-8	-0.0372565	0.110371	0.000685912	0.108813	-0.237249	0.110371	-0.359314	0.108813	22-03-2018
Peixe-9	-0.00417005	0.104822	0.0116473	0.143159	-0.204169	0.104822	-0.348357	0.143159	22-03-2018
Peixe-10	-0.0195605	0.0893803	0.0193021	0.117067	-0.219557	0.0893803	-0.340705	0.117067	22-03-2018
Peixe-11	0.0730054	0.115952	0.0605425	0.1398	-0.127009	0.115952	-0.299479	0.1398	22-03-2018
Plešovice-1	-0.0683079	0.0868517	-0.225421	0.118344	-0.268294	0.0868517	-0.585339	0.118344	26-07-2018
Plešovice-2	-0.0545739	0.0778917	-0.157717	0.109001	-0.254563	0.0778917	-0.51766	0.109001	26-07-2018
Plešovice-3	0.00900916	0.0858053	-0.049652	0.107699	-0.190993	0.0858053	-0.409634	0.107699	26-07-2018
Plešovice-4	0.0228954	0.0941827	0.00527785	0.116398	-0.177109	0.0941827	-0.354724	0.116398	26-07-2018
Plešovice-5	-0.0333349	0.104469	0.011289	0.14399	-0.233328	0.104469	-0.348715	0.14399	22-03-2018
Plešovice-6	0.0204975	0.115956	0.0150184	0.114085	-0.179507	0.115956	-0.344987	0.114085	22-03-2018
Plešovice-7	-0.0340516	0.0811318	0.0199416	0.123361	-0.234045	0.0811318	-0.340066	0.123361	26-07-2018
Plešovice-8	-0.0440497	0.111662	0.026802	0.138826	-0.244041	0.111662	-0.333208	0.138826	22-03-2018
Plešovice-9	0.00321973	0.112006	0.0269133	0.123356	-0.196781	0.112006	-0.333096	0.123356	22-03-2018
Plešovice-10	0.0357475	0.104383	0.0410395	0.117178	-0.16426	0.104383	-0.318975	0.117178	22-03-2018
Plešovice-11	0.0106656	0.0976265	0.059681	0.104936	-0.189336	0.0976265	-0.300341	0.104936	22-03-2018
QGNG-1	-0.0462453	0.112462	-0.0880777	0.139915	-0.246236	0.112462	-0.448046	0.139915	22-03-2018
QGNG-2	-0.00440034	0.115081	-0.063294	0.130463	-0.204399	0.115081	-0.423271	0.130463	22-03-2018
QGNG-3	0.00503117	0.11176	-0.0336964	0.11649	-0.19497	0.11176	-0.393684	0.11649	22-03-2018
QGNG-4	-0.0291093	0.111739	-0.0335344	0.137088	-0.229104	0.111739	-0.393522	0.137088	22-03-2018
QGNG-5	0.0354141	0.101997	-0.0196513	0.13103	-0.164593	0.101997	-0.379644	0.13103	22-03-2018
QGNG-6	-0.00973775	0.100344	0.03626	0.124893	-0.209736	0.100344	-0.323753	0.124893	22-03-2018
QGNG-7	-0.00555789	0.103877	0.047397	0.111514	-0.205557	0.103877	-0.31262	0.111514	22-03-2018
R33-1	-0.000266613	0.101774	-0.120283	0.135578	-0.200267	0.101774	-0.48024	0.135578	22-03-2018
R33-2	0.0133306	0.117983	-0.10726	0.126377	-0.186672	0.117983	-0.467222	0.126377	22-03-2018
R33-3	-0.0111084	0.103168	-0.0718274	0.138205	-0.211106	0.103168	-0.431802	0.138205	22-03-2018
R33-4	-0.0237911	0.107148	-0.0716676	0.109942	-0.223786	0.107148	-0.431642	0.109942	22-03-2018
R33-5	-0.0563919	0.111287	-0.0634459	0.118244	-0.256381	0.111287	-0.423423	0.118244	22-03-2018
R33-6	-0.0251663	0.100815	-0.0502827	0.119792	-0.225161	0.100815	-0.410265	0.119792	22-03-2018
R33-7	-0.0407892	0.118028	-0.0427072	0.149498	-0.240781	0.118028	-0.402692	0.149498	22-03-2018
R33-8	-0.0221061	0.101807	0.0131366	0.139116	-0.222102	0.101807	-0.346868	0.139116	22-03-2018
* Delta relative to 91500. **Values re-calculated relative to NBS28.
