# Supplementary material for: Silicon isotope measurement in zircon by laser ablation multiple collector inductively coupled plasma mass spectrometry
Source: Royal Society of Chemistry journal article supplement (doi:10.1039/d0ja00214c), 2020-01-01
Supplement: d0ja00214c5.xlsx [file d0ja00214c5.xlsx]

## Sheet: Session 16-01-2018
		Background (V)			Sample
Sample	Name	28Si	29Si	30Si	29Si/28Si	2SE (abs)	2SE (rel)	30Si/28Si	2SE (abs)	2SE (rel)	28Si (V)	Date	frequency	spot size	Fluence	Spot/Line	Traverse rate	Resolution
San Carlos olivine	San Carlos_1	0.196985	0.0103318	0.00708705	0.0524785	5.54068e-06	0.00010558	0.0359541	4.50001e-06	0.00012516	5.03834	16/01/2018	10Hz	40 μm	~3 J/cm2	Spot	-	7800
San Carlos olivine	San Carlos_2	0.188487	0.00990931	0.00677589	0.0524857	5.27838e-06	0.000100568	0.0359696	3.93425e-06	0.000109377	5.09489	16/01/2018	10Hz	40 μm	~3 J/cm2	Spot	-	7800
San Carlos olivine	San Carlos_3	0.186751	0.00980044	0.00671328	0.052484	4.85844e-06	9.257e-05	0.0359678	4.05416e-06	0.000112716	5.10026	16/01/2018	10Hz	40 μm	~3 J/cm2	Spot	-	7800
San Carlos olivine	San Carlos_4	0.184765	0.00971054	0.00665	0.052486	4.62636e-06	8.81445e-05	0.0359748	4.7406e-06	0.000131776	5.11009	16/01/2018	10Hz	40 μm	~3 J/cm2	Spot	-	7800
San Carlos olivine	San Carlos_5	0.180373	0.00947845	0.00648848	0.0524931	5.02629e-06	9.57514e-05	0.0359808	5.02747e-06	0.000139726	5.01813	16/01/2018	10Hz	40 μm	~3 J/cm2	Spot	-	7800
San Carlos olivine	San Carlos_6	0.178919	0.00941076	0.00644533	0.0524964	3.87188e-06	7.37553e-05	0.0359852	4.38491e-06	0.000121853	4.88827	16/01/2018	10Hz	40 μm	~3 J/cm2	Spot	-	7800
San Carlos olivine	San Carlos_7	0.173307	0.009115	0.0062344	0.0524978	5.88079e-06	0.00011202	0.0359958	4.33254e-06	0.000120362	5.05323	16/01/2018	10Hz	40 μm	~3 J/cm2	Spot	-	7800
San Carlos olivine	San Carlos_8	0.168751	0.00885654	0.00607437	0.0525001	5.08918e-06	9.69365e-05	0.0359994	3.52207e-06	9.78367e-05	4.76065	16/01/2018	10Hz	40 μm	~3 J/cm2	Spot	-	7800
San Carlos olivine	San Carlos_9	0.165137	0.00868388	0.00594342	0.0525115	4.76146e-06	9.06746e-05	0.0360048	4.64052e-06	0.000128886	4.73047	16/01/2018	10Hz	40 μm	~3 J/cm2	Spot	-	7800
San Carlos olivine	San Carlos_10	0.160502	0.00843463	0.00577108	0.052512	4.39161e-06	8.36307e-05	0.0360104	5.16311e-06	0.000143378	4.51884	16/01/2018	10Hz	40 μm	~3 J/cm2	Spot	-	7800
San Carlos olivine	San Carlos_11	0.1561	0.00819593	0.00562812	0.0525166	5.33179e-06	0.000101526	0.0360216	4.12913e-06	0.000114629	4.59565	16/01/2018	10Hz	40 μm	~3 J/cm2	Spot	-	7800
San Carlos olivine	San Carlos_1	0.647709	0.0341492	0.0236196	0.0526825	4.4559e-06	8.45802e-05	0.0362565	4.03609e-06	0.00011132	7.51043	16/01/2018	10Hz	27 μm	~3 J/cm2	Spot	-	7800
San Carlos olivine	San Carlos_2	0.644863	0.0340092	0.0235097	0.0526736	5.20318e-06	9.87816e-05	0.0362387	3.98006e-06	0.000109829	7.1519	16/01/2018	10Hz	27 μm	~3 J/cm2	Spot	-	7800
San Carlos olivine	San Carlos_3	0.644087	0.0339585	0.0234504	0.0526786	5.43402e-06	0.000103154	0.0362442	4.19456e-06	0.00011573	7.23227	16/01/2018	10Hz	27 μm	~3 J/cm2	Spot	-	7800
San Carlos olivine	San Carlos_4	0.643174	0.033905	0.0234056	0.0526748	4.46011e-06	8.46725e-05	0.0362397	4.48983e-06	0.000123892	7.25442	16/01/2018	10Hz	27 μm	~3 J/cm2	Spot	-	7800
San Carlos olivine	San Carlos_5	0.644722	0.0339821	0.0234923	0.0526771	4.73703e-06	8.99257e-05	0.0362434	3.76326e-06	0.000103833	7.24381	16/01/2018	10Hz	27 μm	~3 J/cm2	Spot	-	7800
San Carlos olivine	San Carlos_6	0.642591	0.0338829	0.0234133	0.0526728	5.5628e-06	0.000105611	0.0362391	4.24798e-06	0.000117221	7.41932	16/01/2018	10Hz	27 μm	~3 J/cm2	Spot	-	7800
San Carlos olivine	San Carlos_7	0.641947	0.0338384	0.023372	0.0526748	3.93032e-06	7.46147e-05	0.0362395	3.45136e-06	9.52376e-05	7.24937	16/01/2018	10Hz	27 μm	~3 J/cm2	Spot	-	7800
San Carlos olivine	San Carlos_8	0.64203	0.0338622	0.0233694	0.0526706	4.17085e-06	7.91874e-05	0.0362322	4.62548e-06	0.000127662	7.2795	16/01/2018	10Hz	27 μm	~3 J/cm2	Spot	-	7800
San Carlos olivine	San Carlos_9	0.633808	0.0334001	0.0230567	0.0526659	4.7444e-06	9.00847e-05	0.0362281	5.00801e-06	0.000138236	7.53496	16/01/2018	10Hz	27 μm	~3 J/cm2	Spot	-	7800
San Carlos olivine	San Carlos_10	0.631686	0.033292	0.0230072	0.0526607	4.16815e-06	7.91512e-05	0.0362225	4.72861e-06	0.000130543	6.99212	16/01/2018	10Hz	27 μm	~3 J/cm2	Spot	-	7800
San Carlos olivine	San Carlos_11	0.624397	0.0329082	0.0227447	0.0526573	5.26382e-06	9.99636e-05	0.0362208	4.50276e-06	0.000124314	6.92164	16/01/2018	10Hz	27 μm	~3 J/cm2	Spot	-	7800
San Carlos olivine	San Carlos_1	0.499055	0.026252	0.0180392	0.0525297	4.06541e-06	7.73927e-05	0.036027	3.61943e-06	0.000100464	8.94022	16/01/2018	10Hz	27 μm	~3 J/cm2	Line	1.6 µm/s	7800
San Carlos olivine	San Carlos_2	0.502313	0.0264051	0.0181138	0.0525368	3.06741e-06	5.83859e-05	0.0360401	3.34381e-06	9.27803e-05	9.10072	16/01/2018	10Hz	27 μm	~3 J/cm2	Line	1.6 µm/s	7800
San Carlos olivine	San Carlos_3	0.511724	0.0269191	0.018479	0.0525435	4.56671e-06	8.6913e-05	0.0360453	4.3519e-06	0.000120734	9.07183	16/01/2018	10Hz	27 μm	~3 J/cm2	Line	1.6 µm/s	7800
San Carlos olivine	San Carlos_4	0.505693	0.0266065	0.0182828	0.0525512	4.25756e-06	8.10173e-05	0.0360526	3.88081e-06	0.000107643	9.08686	16/01/2018	10Hz	27 μm	~3 J/cm2	Line	1.6 µm/s	7800
San Carlos olivine	San Carlos_5	0.51319	0.0270002	0.0185815	0.0525534	3.98084e-06	7.57484e-05	0.0360609	4.25773e-06	0.000118071	9.1485	16/01/2018	10Hz	27 μm	~3 J/cm2	Line	1.6 µm/s	7800
San Carlos olivine	San Carlos_6	0.514348	0.0270508	0.0185742	0.0525575	3.21676e-06	6.12047e-05	0.0360687	3.5119e-06	9.7367e-05	9.26465	16/01/2018	10Hz	27 μm	~3 J/cm2	Line	1.6 µm/s	7800
San Carlos olivine	San Carlos_7	0.51312	0.0269872	0.0185711	0.0525539	3.27997e-06	6.24115e-05	0.0360675	3.56855e-06	9.89408e-05	9.22667	16/01/2018	10Hz	27 μm	~3 J/cm2	Line	1.6 µm/s	7800
San Carlos olivine	San Carlos_8	0.513102	0.0269972	0.0185619	0.05256	3.41436e-06	6.49613e-05	0.0360671	3.20513e-06	8.88659e-05	9.32923	16/01/2018	10Hz	27 μm	~3 J/cm2	Line	1.6 µm/s	7800
San Carlos olivine	San Carlos_9	0.505452	0.0265882	0.018255	0.0525553	4.42551e-06	8.42068e-05	0.0360631	5.00276e-06	0.000138722	9.31975	16/01/2018	10Hz	27 μm	~3 J/cm2	Line	1.6 µm/s	7800
San Carlos olivine	San Carlos_10	0.500311	0.0262935	0.0180847	0.0525549	3.57271e-06	6.79805e-05	0.0360654	3.32238e-06	9.21209e-05	9.30046	16/01/2018	10Hz	27 μm	~3 J/cm2	Line	1.6 µm/s	7800
San Carlos olivine	San Carlos_11	0.498108	0.0262045	0.0179794	0.052552	4.54911e-06	8.6564e-05	0.0360597	4.27319e-06	0.000118503	9.21592	16/01/2018	10Hz	27 μm	~3 J/cm2	Line	1.6 µm/s	7800
San Carlos olivine	San Carlos_1	0.610249	0.0321338	0.0222036	0.0526612	3.10382e-06	5.89393e-05	0.0362148	3.11507e-06	8.60166e-05	11.3914	16/01/2018	6Hz	40 μm	~3 J/cm2	Spot	-	7800
San Carlos olivine	San Carlos_2	0.597764	0.0314901	0.0217404	0.0526519	2.77048e-06	5.26188e-05	0.0362043	3.07967e-06	8.50635e-05	10.9211	16/01/2018	6Hz	40 μm	~3 J/cm2	spot	-	7800
San Carlos olivine	San Carlos_3	0.589848	0.0310801	0.0214656	0.0526456	3.28013e-06	6.23059e-05	0.0361987	2.73532e-06	7.55639e-05	10.072	16/01/2018	6Hz	40 μm	~3 J/cm2	spot	-	7800
San Carlos olivine	San Carlos_4	0.586061	0.030881	0.0213204	0.0526445	3.62337e-06	6.88271e-05	0.0361939	3.71849e-06	0.000102738	9.5109	16/01/2018	6Hz	40 μm	~3 J/cm2	spot	-	7800
San Carlos olivine	San Carlos_5	0.575816	0.0303215	0.0209327	0.0526351	3.55085e-06	6.74616e-05	0.036182	2.41416e-06	6.67227e-05	9.64524	16/01/2018	6Hz	40 μm	~3 J/cm2	spot	-	7800
San Carlos olivine	San Carlos_6	0.56764	0.0298929	0.0206474	0.052636	3.5798e-06	6.80105e-05	0.0361804	2.88978e-06	7.98714e-05	10.7178	16/01/2018	6Hz	40 μm	~3 J/cm2	spot	-	7800
San Carlos olivine	San Carlos_7	0.571675	0.0301229	0.020785	0.0526347	3.41785e-06	6.49352e-05	0.0361817	3.06905e-06	8.48233e-05	9.50368	16/01/2018	6Hz	40 μm	~3 J/cm2	spot	-	7800
San Carlos olivine	San Carlos_8	0.569358	0.0299813	0.020689	0.0526278	3.76076e-06	7.14595e-05	0.0361717	3.87305e-06	0.000107074	11.3122	16/01/2018	6Hz	40 μm	~3 J/cm2	spot	-	7800
San Carlos olivine	San Carlos_9	0.582063	0.0306725	0.021165	0.0526319	2.1724e-06	4.12753e-05	0.0361771	2.94618e-06	8.14375e-05	10.5062	16/01/2018	6Hz	40 μm	~3 J/cm2	spot	-	7800
San Carlos olivine	San Carlos_10	0.569927	0.0300089	0.0206985	0.0526313	2.61846e-06	4.97511e-05	0.0361763	3.95278e-06	0.000109264	9.66387	16/01/2018	6Hz	40 μm	~3 J/cm2	spot	-	7800
San Carlos olivine	San Carlos_11	0.568219	0.0299201	0.0206404	0.0526323	3.58813e-06	6.81735e-05	0.036175	3.14809e-06	8.70238e-05	8.9305	16/01/2018	6Hz	40 μm	~3 J/cm2	spot	-	7800
San Carlos olivine	San Carlos_1	0.493416	0.0259628	0.0178466	0.0525511	3.58966e-06	6.83079e-05	0.0360558	4.13127e-06	0.00011458	12.8553	16/01/2018	6Hz	40 μm	~3 J/cm2	Line	1.6 µm/s	7800
San Carlos olivine	San Carlos_2	0.486063	0.0255654	0.0175543	0.0525494	3.80748e-06	7.24551e-05	0.0360524	4.47569e-06	0.000124144	12.9484	16/01/2018	6Hz	40 μm	~3 J/cm2	Line	1.6 µm/s	7800
San Carlos olivine	San Carlos_3	0.47855	0.0251735	0.0172764	0.0525386	3.28376e-06	6.25017e-05	0.036046	3.75345e-06	0.000104129	12.8027	16/01/2018	6Hz	40 μm	~3 J/cm2	Line	1.6 µm/s	7800
San Carlos olivine	San Carlos_4	0.473009	0.02488	0.0170943	0.0525323	3.12968e-06	5.95763e-05	0.036036	3.03277e-06	8.41596e-05	12.6651	16/01/2018	6Hz	40 μm	~3 J/cm2	Line	1.6 µm/s	7800
San Carlos olivine	San Carlos_5	0.46606	0.0245005	0.0168054	0.0525348	3.57377e-06	6.80267e-05	0.0360313	3.69221e-06	0.000102472	12.6838	16/01/2018	6Hz	40 μm	~3 J/cm2	Line	1.6 µm/s	7800
San Carlos olivine	San Carlos_6	0.460542	0.024209	0.0166429	0.0525305	3.74319e-06	7.12575e-05	0.0360307	4.26064e-06	0.00011825	12.7238	16/01/2018	6Hz	40 μm	~3 J/cm2	Line	1.6 µm/s	7800
San Carlos olivine	San Carlos_7	0.461172	0.0242435	0.016646	0.052529	3.10235e-06	5.90598e-05	0.0360293	3.58694e-06	9.9556e-05	12.7741	16/01/2018	6Hz	40 μm	~3 J/cm2	Line	1.6 µm/s	7800
San Carlos olivine	San Carlos_8	0.460414	0.0242122	0.0166347	0.0525264	2.68512e-06	5.11195e-05	0.036025	3.04745e-06	8.45928e-05	12.6747	16/01/2018	6Hz	40 μm	~3 J/cm2	Line	1.6 µm/s	7800
San Carlos olivine	San Carlos_9	0.454022	0.0238747	0.0163827	0.0525236	3.8351e-06	7.30168e-05	0.0360226	4.2149e-06	0.000117007	12.7287	16/01/2018	6Hz	40 μm	~3 J/cm2	Line	1.6 µm/s	7800
San Carlos olivine	San Carlos_10	0.453832	0.023861	0.016374	0.0525189	3.91371e-06	7.452e-05	0.0360175	3.79128e-06	0.000105262	12.5766	16/01/2018	6Hz	40 μm	~3 J/cm2	Line	1.6 µm/s	7800
San Carlos olivine	San Carlos_11	0.445477	0.0234072	0.0160951	0.0525159	4.25876e-06	8.10946e-05	0.0360121	3.50367e-06	9.72916e-05	12.5698	16/01/2018	6Hz	40 μm	~3 J/cm2	Line	1.6 µm/s	7800
91500 zircon	91500_1	0.503944	0.0265159	0.0182607	0.0526159	3.5512e-06	6.74928e-05	0.03615	4.33945e-06	0.00012004	7.40037	16/01/2018	10Hz	27 μm	~3 J/cm2	spot	-	7800
91500 zircon	91500_2	0.503944	0.0265159	0.0182607	0.0526159	3.5512e-06	6.74928e-05	0.03615	4.33945e-06	0.00012004	7.40037	16/01/2018	10Hz	27 μm	~3 J/cm2	spot	-	7800
91500 zircon	91500_3	0.50125	0.0263733	0.0181486	0.0526042	3.28009e-06	6.23542e-05	0.0361346	3.40275e-06	9.41687e-05	7.31968	16/01/2018	10Hz	27 μm	~3 J/cm2	spot	-	7800
91500 zircon	91500_4	0.496884	0.0261446	0.0179689	0.0525989	3.35099e-06	6.37083e-05	0.0361227	2.41833e-06	6.69475e-05	7.21399	16/01/2018	10Hz	27 μm	~3 J/cm2	spot	-	7800
91500 zircon	91500_5	0.488377	0.0256921	0.0176579	0.0525987	3.53725e-06	6.72497e-05	0.0361236	3.34757e-06	9.267e-05	7.42027	16/01/2018	10Hz	27 μm	~3 J/cm2	spot	-	7800
91500 zircon	91500_6	0.47975	0.0252302	0.0173681	0.0525955	3.90411e-06	7.42289e-05	0.0361183	3.26009e-06	9.02612e-05	7.11107	16/01/2018	10Hz	27 μm	~3 J/cm2	spot	-	7800
91500 zircon	91500_7	0.475367	0.0249876	0.0171991	0.0525917	3.3453e-06	6.36088e-05	0.0361167	3.51436e-06	9.73057e-05	7.25279	16/01/2018	10Hz	27 μm	~3 J/cm2	spot	-	7800
91500 zircon	91500_8	0.468542	0.0246256	0.0169512	0.0525735	4.64879e-06	8.84245e-05	0.0360937	4.10881e-06	0.000113838	6.74084	16/01/2018	10Hz	27 μm	~3 J/cm2	spot	-	7800
91500 zircon	91500_9	0.452828	0.0238205	0.0163784	0.0525671	3.25283e-06	6.18795e-05	0.0360862	2.64355e-06	7.32565e-05	6.60442	16/01/2018	10Hz	27 μm	~3 J/cm2	spot	-	7800
91500 zircon	91500_10	0.449762	0.0236423	0.0162638	0.0525666	3.3425e-06	6.3586e-05	0.0360851	3.18765e-06	8.8337e-05	6.58585	16/01/2018	10Hz	27 μm	~3 J/cm2	spot	-	7800
91500 zircon	91500_11	0.448028	0.023552	0.0161932	0.05257	3.63769e-06	6.91971e-05	0.0360834	3.12674e-06	8.66531e-05	6.62386	16/01/2018	10Hz	27 μm	~3 J/cm2	spot	-	7800
91500 zircon	91500_1	0.42317	0.0222337	0.0152326	0.0525335	3.6492e-06	6.94643e-05	0.0360293	3.18164e-06	8.83071e-05	8.25491	16/01/2018	10Hz	27 μm	~3 J/cm2	Line	1.6 µm/s	7800
91500 zircon	91500_2	0.42317	0.0222337	0.0152326	0.0525335	3.6492e-06	6.94643e-05	0.0360293	3.18164e-06	8.83071e-05	8.25491	16/01/2018	10Hz	27 μm	~3 J/cm2	Line	1.6 µm/s	7800
91500 zircon	91500_3	0.418738	0.0220046	0.0150692	0.0525314	3.79873e-06	7.23134e-05	0.036029	2.89854e-06	8.045e-05	8.13214	16/01/2018	10Hz	27 μm	~3 J/cm2	Line	1.6 µm/s	7800
91500 zircon	91500_4	0.413571	0.0217203	0.0148814	0.0525308	4.4264e-06	8.42629e-05	0.0360237	3.44515e-06	9.56357e-05	8.1255	16/01/2018	10Hz	27 μm	~3 J/cm2	Line	1.6 µm/s	7800
91500 zircon	91500_5	0.408166	0.0214426	0.0146716	0.0525282	2.71142e-06	5.16184e-05	0.0360218	3.04575e-06	8.45528e-05	8.10952	16/01/2018	10Hz	27 μm	~3 J/cm2	Line	1.6 µm/s	7800
91500 zircon	91500_6	0.402894	0.0211484	0.0144841	0.0525228	3.00031e-06	5.7124e-05	0.0360167	2.88286e-06	8.00422e-05	8.14159	16/01/2018	10Hz	27 μm	~3 J/cm2	Line	1.6 µm/s	7800
91500 zircon	91500_7	0.399647	0.0209986	0.0143585	0.0525234	3.61222e-06	6.87736e-05	0.0360189	2.98906e-06	8.29858e-05	7.97004	16/01/2018	10Hz	27 μm	~3 J/cm2	Line	1.6 µm/s	7800
91500 zircon	91500_8	0.39707	0.0208614	0.0142654	0.0525204	3.57422e-06	6.8054e-05	0.0360118	2.78558e-06	7.73521e-05	7.88694	16/01/2018	10Hz	27 μm	~3 J/cm2	Line	1.6 µm/s	7800
91500 zircon	91500_9	0.39707	0.0208614	0.0142654	0.0525204	3.57422e-06	6.8054e-05	0.0360118	2.78558e-06	7.73521e-05	7.88694	16/01/2018	10Hz	27 μm	~3 J/cm2	Line	1.6 µm/s	7800
91500 zircon	91500_10	0.392576	0.0206241	0.0141046	0.0525194	4.27379e-06	8.13756e-05	0.0360122	3.39724e-06	9.43359e-05	7.94244	16/01/2018	10Hz	27 μm	~3 J/cm2	Line	1.6 µm/s	7800
91500 zircon	91500_11	0.395526	0.0207754	0.014216	0.0525177	4.38467e-06	8.34893e-05	0.0360109	3.06052e-06	8.49887e-05	7.88177	16/01/2018	10Hz	27 μm	~3 J/cm2	Line	1.6 µm/s	7800
91500 zircon	91500_1	0.568455	0.0299407	0.0206562	0.0526734	2.93549e-06	5.57301e-05	0.0362276	3.34696e-06	9.23869e-05	12.1463	16/01/2018	6Hz	40 μm	~3 J/cm2	spot	-	7800
91500 zircon	91500_2	0.566431	0.0298205	0.0205866	0.052657	2.92662e-06	5.5579e-05	0.0362096	2.35612e-06	6.5069e-05	12.1316	16/01/2018	6Hz	40 μm	~3 J/cm2	spot	-	7800
91500 zircon	91500_3	0.558969	0.0294393	0.0202908	0.0526566	2.63159e-06	4.99764e-05	0.0362108	3.10616e-06	8.57798e-05	12.1557	16/01/2018	6Hz	40 μm	~3 J/cm2	spot	-	7800
91500 zircon	91500_4	0.552947	0.0291173	0.0200589	0.0526497	2.96972e-06	5.64053e-05	0.0361965	3.14816e-06	8.6974e-05	12.0255	16/01/2018	6Hz	40 μm	~3 J/cm2	spot	-	7800
91500 zircon	91500_5	0.540764	0.0284751	0.019627	0.0526434	3.47498e-06	6.60099e-05	0.0361879	2.80922e-06	7.76288e-05	11.8963	16/01/2018	6Hz	40 μm	~3 J/cm2	spot	-	7800
91500 zircon	91500_6	0.536226	0.0282218	0.0194581	0.0526387	3.46413e-06	6.58097e-05	0.0361811	2.41589e-06	6.67721e-05	11.7208	16/01/2018	6Hz	40 μm	~3 J/cm2	spot	-	7800
91500 zircon	91500_7	0.521407	0.0274577	0.0188943	0.052631	3.07895e-06	5.85008e-05	0.0361719	2.52621e-06	6.98391e-05	11.5925	16/01/2018	6Hz	40 μm	~3 J/cm2	spot	-	7800
91500 zircon	91500_8	0.51446	0.0270815	0.0186587	0.0526267	2.69165e-06	5.11462e-05	0.0361654	2.8103e-06	7.77069e-05	11.5171	16/01/2018	6Hz	40 μm	~3 J/cm2	spot	-	7800
91500 zircon	91500_9	0.511047	0.0268913	0.0185413	0.0526246	3.72929e-06	7.0866e-05	0.0361635	2.59516e-06	7.17618e-05	11.3136	16/01/2018	6Hz	40 μm	~3 J/cm2	spot	-	7800
91500 zircon	91500_10	0.503652	0.0264893	0.0182692	0.0526209	3.46154e-06	6.57826e-05	0.03616	2.47092e-06	6.8333e-05	11.249	16/01/2018	6Hz	40 μm	~3 J/cm2	spot	-	7800
91500 zircon	91500_11	0.502268	0.0264278	0.018203	0.052616	3.47072e-06	6.59632e-05	0.0361523	2.69386e-06	7.45141e-05	11.2117	16/01/2018	6Hz	40 μm	~3 J/cm2	spot	-	7800
91500 zircon	91500_1	0.43864	0.0230583	0.0158485	0.0525749	2.70205e-06	5.13943e-05	0.0360907	3.12783e-06	8.66656e-05	12.422	16/01/2018	6Hz	40 μm	~3 J/cm2	Line	1.6 µm/s	7800
91500 zircon	91500_2	0.430585	0.0226335	0.01553	0.052567	3.35748e-06	6.38706e-05	0.0360836	2.50938e-06	6.95435e-05	12.4867	16/01/2018	6Hz	40 μm	~3 J/cm2	Line	1.6 µm/s	7800
91500 zircon	91500_3	0.417908	0.0219585	0.015103	0.05256	3.49262e-06	6.64501e-05	0.0360709	4.13886e-06	0.000114743	12.0302	16/01/2018	6Hz	40 μm	~3 J/cm2	Line	1.6 µm/s	7800
91500 zircon	91500_4	0.408095	0.0214486	0.014748	0.0525496	3.33694e-06	6.35008e-05	0.0360577	2.59761e-06	7.20402e-05	11.7273	16/01/2018	6Hz	40 μm	~3 J/cm2	Line	1.6 µm/s	7800
91500 zircon	91500_5	0.403894	0.0212281	0.0145769	0.0525434	3.00171e-06	5.71281e-05	0.0360467	2.20248e-06	6.11007e-05	11.3272	16/01/2018	6Hz	40 μm	~3 J/cm2	Line	1.6 µm/s	7800
91500 zircon	91500_6	0.397476	0.0209071	0.01433	0.0525434	2.28845e-06	4.35536e-05	0.0360463	2.76229e-06	7.66317e-05	11.2476	16/01/2018	6Hz	40 μm	~3 J/cm2	Line	1.6 µm/s	7800
91500 zircon	91500_7	0.395207	0.0207578	0.0142467	0.0525378	3.44185e-06	6.55119e-05	0.03604	3.21986e-06	8.93411e-05	11.1629	16/01/2018	6Hz	40 μm	~3 J/cm2	Line	1.6 µm/s	7800
91500 zircon	91500_8	0.398347	0.0209222	0.0143524	0.0525378	2.73568e-06	5.20706e-05	0.0360388	3.29113e-06	9.13219e-05	11.1668	16/01/2018	6Hz	40 μm	~3 J/cm2	Line	1.6 µm/s	7800
91500 zircon	91500_9	0.400997	0.0210656	0.0144284	0.0525348	3.31243e-06	6.3052e-05	0.0360316	2.71195e-06	7.5266e-05	11.1299	16/01/2018	6Hz	40 μm	~3 J/cm2	Line	1.6 µm/s	7800
91500 zircon	91500_10	0.402483	0.0211683	0.0144649	0.0525339	3.96113e-06	7.54013e-05	0.0360295	3.96928e-06	0.000110168	11.098	16/01/2018	6Hz	40 μm	~3 J/cm2	Line	1.6 µm/s	7800
91500 zircon	91500_11	0.406289	0.0213513	0.0146415	0.0525365	3.34675e-06	6.37034e-05	0.036028	3.35254e-06	9.30537e-05	10.963	16/01/2018	6Hz	40 μm	~3 J/cm2	Line	1.6 µm/s	7800
SRM NIST 612	NIST_1	0.616368	0.032455	0.0221445	0.0526003	2.5944e-06	4.93229e-05	0.0361089	2.87588e-06	7.96445e-05	13.5024	17/01/2018	6Hz	27 μm	~3 J/cm2	Line	1.6 µm/s	7800
SRM NIST 612	NIST_2	0.615419	0.0324023	0.0220957	0.0525951	2.9791e-06	5.66421e-05	0.0361035	3.07961e-06	8.52996e-05	13.3679	17/01/2018	6Hz	27 μm	~3 J/cm2	Line	1.6 µm/s	7800
SRM NIST 612	NIST_3	0.616399	0.0324551	0.0222081	0.0525918	2.78817e-06	5.30152e-05	0.036104	3.04104e-06	8.42298e-05	13.3644	17/01/2018	6Hz	27 μm	~3 J/cm2	Line	1.6 µm/s	7800
SRM NIST 612	NIST_4	0.614882	0.032367	0.022139	0.0525862	3.05043e-06	5.80083e-05	0.0360961	2.65343e-06	7.35101e-05	13.3761	17/01/2018	6Hz	27 μm	~3 J/cm2	Line	1.6 µm/s	7800
SRM NIST 612	NIST_5	0.614701	0.0323582	0.0221189	0.0525873	2.61122e-06	4.9655e-05	0.0360939	2.58247e-06	7.15487e-05	13.4336	17/01/2018	6Hz	27 μm	~3 J/cm2	Line	1.6 µm/s	7800
SRM NIST 612	NIST_6	0.6132	0.0322605	0.0220695	0.0525822	3.46814e-06	6.59566e-05	0.0360877	2.89936e-06	8.03419e-05	13.3482	17/01/2018	6Hz	27 μm	~3 J/cm2	Line	1.6 µm/s	7800
SRM NIST 612	NIST_7	0.608016	0.0319894	0.0218774	0.052571	2.33683e-06	4.4451e-05	0.0360752	2.72908e-06	7.56498e-05	13.2446	17/01/2018	6Hz	27 μm	~3 J/cm2	Line	1.6 µm/s	7800
SRM NIST 612	NIST_8	0.596218	0.0313658	0.0214298	0.0525616	2.28068e-06	4.33905e-05	0.0360646	2.80723e-06	7.78392e-05	13.1738	17/01/2018	6Hz	27 μm	~3 J/cm2	Line	1.6 µm/s	7800
SRM NIST 612	NIST_9	0.589976	0.0310243	0.02123	0.0525634	2.94723e-06	5.607e-05	0.0360623	2.72145e-06	7.54653e-05	13.1942	17/01/2018	6Hz	27 μm	~3 J/cm2	Line	1.6 µm/s	7800
SRM NIST 612	NIST_10	0.586322	0.0308348	0.0210844	0.0525529	3.84813e-06	7.32239e-05	0.0360458	2.70922e-06	7.51605e-05	13.0195	17/01/2018	6Hz	27 μm	~3 J/cm2	Line	1.6 µm/s	7800
SRM NIST 612	NIST_end	0.560055	0.0294518	0.0201512	0.0525323	3.37571e-06	6.42596e-05	0.0360252	2.62521e-06	7.28715e-05	12.7027	17/01/2018	6Hz	27 μm	~3 J/cm2	Line	1.6 µm/s	7800
USGS BHVO-2	BHVO_1	0.614088	0.0323391	0.0220643	0.0525745	2.99425e-06	5.69526e-05	0.0360761	2.57689e-06	7.14294e-05	12.8995	17/01/2018	10Hz	27 μm	~3 J/cm2	Line	1.6 µm/s	7800
USGS BHVO-2	BHVO_2	0.617584	0.0325054	0.0222027	0.052577	2.79987e-06	5.32528e-05	0.0360779	3.01973e-06	8.37002e-05	13.081	17/01/2018	10Hz	27 μm	~3 J/cm2	Line	1.6 µm/s	7800
USGS BHVO-2	BHVO_3	0.612269	0.0322518	0.0220418	0.0525717	2.90889e-06	5.5332e-05	0.0360764	3.00256e-06	8.32277e-05	13.3612	17/01/2018	10Hz	27 μm	~3 J/cm2	Line	1.6 µm/s	7800
USGS BHVO-2	BHVO_4	0.615934	0.0324056	0.022175	0.052572	2.34088e-06	4.45271e-05	0.0360741	2.17017e-06	6.01586e-05	13.2068	17/01/2018	10Hz	27 μm	~3 J/cm2	Line	1.6 µm/s	7800
USGS BHVO-2	BHVO_5	0.615234	0.0323661	0.0221301	0.0525705	2.5673e-06	4.88353e-05	0.0360717	2.92642e-06	8.11277e-05	13.1549	17/01/2018	10Hz	27 μm	~3 J/cm2	Line	1.6 µm/s	7800
USGS BHVO-2	BHVO_6	0.612455	0.032237	0.0220084	0.0525619	2.64265e-06	5.02769e-05	0.0360621	2.6956e-06	7.4749e-05	13.3216	17/01/2018	10Hz	27 μm	~3 J/cm2	Line	1.6 µm/s	7800
USGS BHVO-2	BHVO_7	0.597252	0.0314227	0.0214502	0.0525517	2.27711e-06	4.33309e-05	0.0360497	2.58118e-06	7.16005e-05	13.3601	17/01/2018	10Hz	27 μm	~3 J/cm2	Line	1.6 µm/s	7800
USGS BHVO-2	BHVO_8	0.591305	0.0310772	0.0212715	0.0525451	2.49423e-06	4.74684e-05	0.0360407	3.37252e-06	9.35753e-05	13.4008	17/01/2018	10Hz	27 μm	~3 J/cm2	Line	1.6 µm/s	7800
USGS BHVO-2	BHVO_9	0.589676	0.0310099	0.0212086	0.0525443	3.15503e-06	6.00452e-05	0.0360386	3.42199e-06	9.49535e-05	13.5417	17/01/2018	10Hz	27 μm	~3 J/cm2	Line	1.6 µm/s	7800
USGS BHVO-2	BHVO_10	0.571667	0.0300656	0.0205738	0.0525267	2.65257e-06	5.04994e-05	0.036017	2.8683e-06	7.96374e-05	13.1695	17/01/2018	10Hz	27 μm	~3 J/cm2	Line	1.6 µm/s	7800
SRM NIST 612	NIST_1-1	0.611278	0.0321587	0.0219685	0.0525367	3.39412e-06	6.46047e-05	0.0360284	2.6275e-06	7.29287e-05	12.8636	17/01/2018	6Hz	27 μm	~3 J/cm2	Line	1.6 µm/s	7800
SRM NIST 612	NIST_2-1	0.611806	0.0321457	0.0220295	0.0525303	2.87683e-06	5.47651e-05	0.036016	3.36578e-06	9.34523e-05	12.5518	17/01/2018	6Hz	27 μm	~3 J/cm2	Line	1.6 µm/s	7800
SRM NIST 612	NIST_3-1	0.588191	0.030911	0.021125	0.0525138	3.25201e-06	6.19267e-05	0.0359977	2.69181e-06	7.47774e-05	12.3779	17/01/2018	6Hz	27 μm	~3 J/cm2	Line	1.6 µm/s	7800
SRM NIST 612	NIST_4-1	0.56866	0.0298632	0.0204653	0.0524979	2.88953e-06	5.50408e-05	0.035979	2.49836e-06	6.94395e-05	12.0463	17/01/2018	6Hz	27 μm	~3 J/cm2	Line	1.6 µm/s	7800
SRM NIST 612	NIST_5-1	0.541997	0.0284739	0.0194886	0.0524862	3.23684e-06	6.16703e-05	0.0359573	2.57797e-06	7.16952e-05	11.61	17/01/2018	6Hz	27 μm	~3 J/cm2	Line	1.6 µm/s	7800
SRM NIST 612	NIST_6-1	0.499831	0.0262462	0.0179505	0.0524636	3.73603e-06	7.12118e-05	0.0359316	2.26168e-06	6.29439e-05	10.9102	17/01/2018	6Hz	27 μm	~3 J/cm2	Line	1.6 µm/s	7800
SRM NIST 612	NIST_7-1	0.44944	0.0235898	0.0161144	0.0524419	3.35636e-06	6.40014e-05	0.035901	3.49396e-06	9.73221e-05	9.99467	17/01/2018	6Hz	27 μm	~3 J/cm2	Line	1.6 µm/s	7800
SRM NIST 612	NIST_8-1	0.606918	0.0319729	0.0218207	0.0526236	3.21168e-06	6.10312e-05	0.0361394	2.35768e-06	6.52385e-05	13.4327	17/01/2018	6Hz	27 μm	~3 J/cm2	Line	1.6 µm/s	7800
SRM NIST 612	NIST_9-1	0.614698	0.0323679	0.0220483	0.0526187	1.8633e-06	3.54113e-05	0.0361325	2.70623e-06	7.48974e-05	13.5157	17/01/2018	6Hz	27 μm	~3 J/cm2	Line	1.6 µm/s	7800
SRM NIST 612	NIST_10-1	0.627564	0.0330246	0.0225568	0.0526136	2.19507e-06	4.17205e-05	0.0361271	2.56891e-06	7.11075e-05	13.5387	17/01/2018	6Hz	27 μm	~3 J/cm2	Line	1.6 µm/s	7800
SRM NIST 612	NIST_10-end	0.620038	0.0326212	0.0222954	0.0526002	2.84671e-06	5.41198e-05	0.0361122	2.51393e-06	6.96144e-05	13.3795	17/01/2018	6Hz	27 μm	~3 J/cm2	Line	1.6 µm/s	7800
SRM NIST 612	NIST_1-2	0.609328	0.03203	0.0219058	0.0525369	2.28403e-06	4.34748e-05	0.0360271	2.67954e-06	7.43757e-05	12.6925	17/01/2018	6Hz	27 μm	~3 J/cm2	Line	1.6 µm/s	7800
SRM NIST 612	NIST_2-2	0.598269	0.0314468	0.0215016	0.0525252	2.73837e-06	5.21344e-05	0.0360082	3.19284e-06	8.86698e-05	12.4367	17/01/2018	6Hz	27 μm	~3 J/cm2	Line	1.6 µm/s	7800
SRM NIST 612	NIST_3-2	0.571364	0.0300264	0.0205312	0.0525088	3.27692e-06	6.2407e-05	0.035991	2.19144e-06	6.08886e-05	12.2246	17/01/2018	6Hz	27 μm	~3 J/cm2	Line	1.6 µm/s	7800
SRM NIST 612	NIST_4-2	0.563965	0.0296306	0.0202782	0.0524982	2.35919e-06	4.49386e-05	0.0359758	3.11535e-06	8.65958e-05	11.9491	17/01/2018	6Hz	27 μm	~3 J/cm2	Line	1.6 µm/s	7800
SRM NIST 612	NIST_5-2	0.51487	0.0270372	0.0185099	0.0524745	2.87981e-06	5.48802e-05	0.0359478	2.57744e-06	7.16996e-05	11.1687	17/01/2018	6Hz	27 μm	~3 J/cm2	Line	1.6 µm/s	7800
SRM NIST 612	NIST_6-2	0.480422	0.0252236	0.0172216	0.0524563	2.24661e-06	4.28281e-05	0.0359207	2.84176e-06	7.91122e-05	10.4601	17/01/2018	6Hz	27 μm	~3 J/cm2	Line	1.6 µm/s	7800
SRM NIST 612	NIST_7-2	0.453505	0.0238235	0.0162711	0.0524442	3.23184e-06	6.16243e-05	0.0359029	2.31162e-06	6.43852e-05	10.1412	17/01/2018	6Hz	27 μm	~3 J/cm2	Line	1.6 µm/s	7800
SRM NIST 612	NIST_8-2	0.607892	0.032013	0.0218152	0.0526175	2.80916e-06	5.33884e-05	0.0361307	2.3181e-06	6.41587e-05	13.5289	17/01/2018	6Hz	27 μm	~3 J/cm2	Line	1.6 µm/s	7800
SRM NIST 612	NIST_9-2	0.623975	0.0328478	0.0224032	0.0526201	3.3834e-06	6.42986e-05	0.0361342	3.20394e-06	8.86678e-05	13.4822	17/01/2018	6Hz	27 μm	~3 J/cm2	Line	1.6 µm/s	7800
SRM NIST 612	NIST_10-2	0.623921	0.0328504	0.022382	0.0526076	2.98828e-06	5.68031e-05	0.0361197	2.64529e-06	7.32366e-05	13.5287	17/01/2018	6Hz	27 μm	~3 J/cm2	Line	1.6 µm/s	7800
USGS BHVO-2	BHVO_1	0.603539	0.0317318	0.021671	0.0525242	3.35557e-06	6.38862e-05	0.0360081	2.98312e-06	8.28458e-05	8.20757	17/01/2018	6Hz	27 μm	~3 J/cm2	Line	1.6 µm/s	7800
USGS BHVO-2	BHVO_2	0.603626	0.0317224	0.0217023	0.0525146	3.59822e-06	6.85185e-05	0.0359916	2.87489e-06	7.98767e-05	7.9745	17/01/2018	6Hz	27 μm	~3 J/cm2	Line	1.6 µm/s	7800
USGS BHVO-2	BHVO_3	0.580154	0.0304621	0.0208625	0.0524992	3.48646e-06	6.64099e-05	0.0359732	3.0011e-06	8.34261e-05	7.76736	17/01/2018	6Hz	27 μm	~3 J/cm2	Line	1.6 µm/s	7800
USGS BHVO-2	BHVO_4	0.564234	0.0296277	0.0202758	0.0524885	3.25999e-06	6.21087e-05	0.0359613	2.79617e-06	7.7755e-05	7.59985	17/01/2018	6Hz	27 μm	~3 J/cm2	Line	1.6 µm/s	7800
USGS BHVO-2	BHVO_5	0.527835	0.0277346	0.018958	0.0524692	3.86735e-06	7.37072e-05	0.0359357	3.0862e-06	8.58813e-05	7.11895	17/01/2018	6Hz	27 μm	~3 J/cm2	Line	1.6 µm/s	7800
USGS BHVO-2	BHVO_6	0.487833	0.0256078	0.0175043	0.0524458	3.41589e-06	6.51318e-05	0.0359067	3.20439e-06	8.9242e-05	6.62865	17/01/2018	6Hz	27 μm	~3 J/cm2	Line	1.6 µm/s	7800
USGS BHVO-2	BHVO_7	0.45507	0.023893	0.0163225	0.0524351	4.45329e-06	8.49296e-05	0.0358844	3.26977e-06	9.11194e-05	6.33	17/01/2018	6Hz	27 μm	~3 J/cm2	Line	1.6 µm/s	7800
USGS BHVO-2	BHVO_8	0.606167	0.0319233	0.0217776	0.0525997	4.09885e-06	7.79254e-05	0.036101	2.57785e-06	7.14066e-05	8.19761	17/01/2018	6Hz	27 μm	~3 J/cm2	Line	1.6 µm/s	7800
USGS BHVO-2	BHVO_9	0.621383	0.0327227	0.0223207	0.0526066	3.30115e-06	6.27516e-05	0.0361084	2.82487e-06	7.82329e-05	8.58576	17/01/2018	6Hz	27 μm	~3 J/cm2	Line	1.6 µm/s	7800
USGS BHVO-2	BHVO_10	0.627582	0.0330471	0.0225459	0.0525977	4.28309e-06	8.14311e-05	0.0360951	3.35189e-06	9.28628e-05	8.61113	17/01/2018	6Hz	27 μm	~3 J/cm2	Line	1.6 µm/s	7800
USGS GSC-1G	GSC1G_1	0.605148	0.0317938	0.0217754	0.052526	3.94121e-06	7.50336e-05	0.0360077	3.5955e-06	9.98538e-05	8.14322	17/01/2018	6Hz	27 μm	~3 J/cm2	Line	1.6 µm/s	7800
USGS GSC-1G	GSC1G_2	0.591859	0.0311044	0.0212662	0.0525095	3.52679e-06	6.71648e-05	0.035993	3.45388e-06	9.59599e-05	7.78484	17/01/2018	6Hz	27 μm	~3 J/cm2	Line	1.6 µm/s	7800
USGS GSC-1G	GSC1G_3	0.571504	0.0300344	0.0205436	0.0524973	2.96632e-06	5.65041e-05	0.0359699	3.6897e-06	0.000102577	7.61312	17/01/2018	6Hz	27 μm	~3 J/cm2	Line	1.6 µm/s	7800
USGS GSC-1G	GSC1G_4	0.559209	0.0293642	0.020096	0.0524833	4.3645e-06	8.31598e-05	0.0359551	2.8236e-06	7.85312e-05	7.3973	17/01/2018	6Hz	27 μm	~3 J/cm2	Line	1.6 µm/s	7800
USGS GSC-1G	GSC1G_5	0.505484	0.0265741	0.0181508	0.0524626	4.02431e-06	7.67082e-05	0.0359261	3.19561e-06	8.89495e-05	6.8271	17/01/2018	6Hz	27 μm	~3 J/cm2	Line	1.6 µm/s	7800
USGS GSC-1G	GSC1G_6	0.46589	0.0244658	0.0167298	0.0524399	3.8409e-06	7.32439e-05	0.0358952	3.79141e-06	0.000105624	6.36359	17/01/2018	6Hz	27 μm	~3 J/cm2	Line	1.6 µm/s	7800
USGS GSC-1G	GSC1G_7	0.440152	0.023107	0.0157894	0.0524325	3.33238e-06	6.35556e-05	0.0358874	3.35672e-06	9.35347e-05	6.2326	17/01/2018	6Hz	27 μm	~3 J/cm2	Line	1.6 µm/s	7800
USGS GSC-1G	GSC1G_8	0.612018	0.0322283	0.0219712	0.0526057	3.5158e-06	6.68331e-05	0.0361081	4.01317e-06	0.000111143	8.40836	17/01/2018	6Hz	27 μm	~3 J/cm2	Line	1.6 µm/s	7800
USGS GSC-1G	GSC1G_9	0.626799	0.0330012	0.0224962	0.0526082	2.66444e-06	5.06469e-05	0.0361083	2.8704e-06	7.94943e-05	8.48864	17/01/2018	6Hz	27 μm	~3 J/cm2	Line	1.6 µm/s	7800
USGS GSC-1G	GSC1G_10	0.623672	0.0328254	0.0224344	0.0525973	3.0888e-06	5.87255e-05	0.0360989	3.0259e-06	8.38226e-05	8.47588	17/01/2018	6Hz	27 μm	~3 J/cm2	Line	1.6 µm/s	7800
SRM NIST 612	NIST_1-1	0.720444	0.0379177	0.0259075	0.0526138	3.30035e-06	6.27278e-05	0.0361098	3.68741e-06	0.000102117	10.1587	17/01/2018	6Hz	27 μm	~3 J/cm2	Spot	-	7800
SRM NIST 612	NIST_1-2	0.657881	0.0345904	0.0236345	0.0525725	4.01584e-06	7.63868e-05	0.0360659	4.23096e-06	0.000117312	9.3815	17/01/2018	6Hz	27 μm	~3 J/cm2	Spot	-	7800
SRM NIST 612	NIST_1-3	0.607029	0.0319217	0.0217614	0.052539	3.73569e-06	7.11033e-05	0.0360256	2.83625e-06	7.87287e-05	9.01281	17/01/2018	6Hz	27 μm	~3 J/cm2	Spot	-	7800
SRM NIST 612	NIST_1-4	0.535591	0.0281391	0.0191864	0.0525102	3.8853e-06	7.39913e-05	0.0359862	3.25552e-06	9.04657e-05	7.75045	17/01/2018	6Hz	27 μm	~3 J/cm2	Spot	-	7800
SRM NIST 612	NIST_1-5	0.667307	0.0350786	0.0239515	0.052563	3.97473e-06	7.56183e-05	0.0360542	4.09838e-06	0.000113673	9.86773	17/01/2018	6Hz	27 μm	~3 J/cm2	Spot	-	7800
SRM NIST 612	NIST_1-6	0.584305	0.0307043	0.0209935	0.052522	3.59374e-06	6.84235e-05	0.0360038	3.05487e-06	8.48485e-05	8.87738	17/01/2018	6Hz	27 μm	~3 J/cm2	Spot	-	7800
SRM NIST 612	NIST_1-7	0.492615	0.0258501	0.0176829	0.0524825	3.01698e-06	5.74854e-05	0.0359515	3.81702e-06	0.000106171	7.48695	17/01/2018	6Hz	27 μm	~3 J/cm2	Spot	-	7800
SRM NIST 612	NIST_1-8	0.463518	0.0243381	0.016643	0.052467	3.19697e-06	6.09329e-05	0.0359321	2.56836e-06	7.14782e-05	7.44359	17/01/2018	6Hz	27 μm	~3 J/cm2	Spot	-	7800
SRM NIST 612	NIST_1-9	0.644647	0.0339101	0.0231468	0.0525862	3.04487e-06	5.79025e-05	0.0360847	2.55934e-06	7.0926e-05	10.0779	17/01/2018	6Hz	27 μm	~3 J/cm2	Spot	-	7800
SRM NIST 612	NIST_1-10	0.616016	0.0323952	0.0221632	0.0525529	2.66832e-06	5.07739e-05	0.0360484	2.91724e-06	8.09257e-05	9.89	17/01/2018	6Hz	27 μm	~3 J/cm2	Spot	-	7800
SRM NIST 612	NIST_10-end	0.605714	0.0318448	0.0217823	0.0525475	3.12093e-06	5.93925e-05	0.0360393	3.88844e-06	0.000107894	9.873	17/01/2018	6Hz	27 μm	~3 J/cm2	Spot	-	7800
SRM NIST 612	NIST_2-1	0.696724	0.0366583	0.0249214	0.0525971	2.80595e-06	5.3348e-05	0.0360985	3.09368e-06	8.57011e-05	9.94498	17/01/2018	6Hz	27 μm	~3 J/cm2	Spot	-	7800
SRM NIST 612	NIST_2-2	0.633253	0.0333186	0.0227168	0.0525561	3.06518e-06	5.8322e-05	0.0360425	3.5618e-06	9.88221e-05	9.31462	17/01/2018	6Hz	27 μm	~3 J/cm2	Spot	-	7800
SRM NIST 612	NIST_2-3	0.578075	0.0303887	0.0206982	0.0525318	2.84833e-06	5.4221e-05	0.0360088	2.74877e-06	7.63361e-05	8.39366	17/01/2018	6Hz	27 μm	~3 J/cm2	Spot	-	7800
SRM NIST 612	NIST_2-4	0.676606	0.0356208	0.0243128	0.0525777	3.86175e-06	7.34484e-05	0.0360713	3.56941e-06	9.89541e-05	10.0783	17/01/2018	6Hz	27 μm	~3 J/cm2	Spot	-	7800
SRM NIST 612	NIST_2-5	0.637938	0.0335435	0.0229064	0.0525459	3.33111e-06	6.33943e-05	0.0360364	2.91074e-06	8.07722e-05	9.46252	17/01/2018	6Hz	27 μm	~3 J/cm2	Spot	-	7800
SRM NIST 612	NIST_2-6	0.538549	0.0282829	0.0193437	0.0524991	3.6957e-06	7.03956e-05	0.0359729	3.48148e-06	9.67808e-05	8.39464	17/01/2018	6Hz	27 μm	~3 J/cm2	Spot	-	7800
SRM NIST 612	NIST_2-7	0.476474	0.0250269	0.0171076	0.0524736	2.85469e-06	5.44024e-05	0.0359443	2.21209e-06	6.15421e-05	7.6286	17/01/2018	6Hz	27 μm	~3 J/cm2	Spot	-	7800
SRM NIST 612	NIST_2-8	0.660192	0.0347532	0.0237275	0.0526003	3.11882e-06	5.92929e-05	0.0361062	2.99029e-06	8.28194e-05	10.4454	17/01/2018	6Hz	27 μm	~3 J/cm2	Spot	-	7800
SRM NIST 612	NIST_2-9	0.629073	0.0330812	0.0226307	0.0525688	3.06358e-06	5.82776e-05	0.0360642	3.29197e-06	9.12807e-05	10.1817	17/01/2018	6Hz	27 μm	~3 J/cm2	Spot	-	7800
SRM NIST 612	NIST_2-10	0.6094	0.0320565	0.0219091	0.0525491	2.30506e-06	4.38649e-05	0.0360448	3.24441e-06	9.00103e-05	9.68889	17/01/2018	6Hz	27 μm	~3 J/cm2	Spot	-	7800
USGS BHVO-2	BHVO_1	0.690864	0.0363501	0.0247811	0.0525772	3.17769e-06	6.04385e-05	0.0360717	4.12642e-06	0.000114395	6.85066	17/01/2018	6Hz	27 μm	~3 J/cm2	Spot	-	7800
USGS BHVO-2	BHVO_2	0.636855	0.0334952	0.0227464	0.052537	5.32006e-06	0.000101263	0.036021	4.23656e-06	0.000117614	6.34305	17/01/2018	6Hz	27 μm	~3 J/cm2	Spot	-	7800
USGS BHVO-2	BHVO_3	0.582473	0.0306021	0.0208848	0.0525169	3.91161e-06	7.44829e-05	0.0359881	3.97348e-06	0.000110411	6.24367	17/01/2018	6Hz	27 μm	~3 J/cm2	Spot	-	7800
USGS BHVO-2	BHVO_4	0.519009	0.0272785	0.0185773	0.0524828	4.73585e-06	9.02363e-05	0.0359502	3.23797e-06	9.00682e-05	5.39135	17/01/2018	6Hz	27 μm	~3 J/cm2	Spot	-	7800
USGS BHVO-2	BHVO_5	0.651982	0.0342791	0.0233985	0.0525343	3.42814e-06	6.52553e-05	0.0360127	3.00357e-06	8.3403e-05	6.63813	17/01/2018	6Hz	27 μm	~3 J/cm2	Spot	-	7800
USGS BHVO-2	BHVO_6	0.556055	0.0292121	0.019931	0.0524888	4.47079e-06	8.51761e-05	0.0359533	4.3486e-06	0.000120951	5.84574	17/01/2018	6Hz	27 μm	~3 J/cm2	Spot	-	7800
USGS BHVO-2	BHVO_7	0.483008	0.0253582	0.0173353	0.052461	4.47232e-06	8.52504e-05	0.035917	3.99489e-06	0.000111226	5.42455	17/01/2018	6Hz	27 μm	~3 J/cm2	Spot	-	7800
USGS BHVO-2	BHVO_8	0.454275	0.0238367	0.0162931	0.052446	4.89824e-06	9.33959e-05	0.035905	4.7388e-06	0.000131982	4.86533	17/01/2018	6Hz	27 μm	~3 J/cm2	Spot	-	7800
USGS BHVO-2	BHVO_9	0.638714	0.0335959	0.0229249	0.0525495	3.29875e-06	6.27741e-05	0.0360357	4.41323e-06	0.000122468	6.9267	17/01/2018	6Hz	27 μm	~3 J/cm2	Spot	-	7800
USGS BHVO-2	BHVO_10	0.606196	0.0318695	0.0217817	0.0525246	4.37027e-06	8.32043e-05	0.0360066	3.35846e-06	9.32735e-05	6.63861	17/01/2018	6Hz	27 μm	~3 J/cm2	Spot	-	7800
USGS GSC-1G	GSC1G_1	0.670243	0.0352647	0.0240305	0.0525661	4.14024e-06	7.87625e-05	0.0360363	4.93236e-06	0.000136872	6.66551	17/01/2018	6Hz	27 μm	~3 J/cm2	Spot	-	7800
USGS GSC-1G	CSG1G_2	0.614568	0.0323091	0.0220294	0.0525337	3.28864e-06	6.26006e-05	0.0360069	4.03933e-06	0.000112182	6.2785	17/01/2018	6Hz	27 μm	~3 J/cm2	Spot	-	7800
USGS GSC-1G	GSC1G_3	0.546767	0.028731	0.0196025	0.0525048	4.18256e-06	7.96605e-05	0.0359642	3.94745e-06	0.000109761	5.71378	17/01/2018	6Hz	27 μm	~3 J/cm2	Spot	-	7800
USGS GSC-1G	GSC1G_4	0.667381	0.0350906	0.0239336	0.0525576	4.12527e-06	7.84904e-05	0.0360366	3.44067e-06	9.54771e-05	6.99907	17/01/2018	6Hz	27 μm	~3 J/cm2	Spot	-	7800
USGS GSC-1G	GSC1G_5	0.608683	0.0319977	0.0218329	0.0525195	3.06844e-06	5.84247e-05	0.0359949	3.87477e-06	0.000107648	6.51959	17/01/2018	6Hz	27 μm	~3 J/cm2	Spot	-	7800
USGS GSC-1G	GSC1G_6	0.520893	0.0273749	0.018704	0.0524813	4.389e-06	8.36299e-05	0.0359463	3.58313e-06	9.96801e-05	5.73131	17/01/2018	6Hz	27 μm	~3 J/cm2	Spot	-	7800
USGS GSC-1G	GSC1G_7	0.462314	0.0242797	0.0165805	0.0524609	4.91382e-06	9.36664e-05	0.0359219	2.71821e-06	7.56699e-05	5.35838	17/01/2018	6Hz	27 μm	~3 J/cm2	Spot	-	7800
USGS GSC-1G	GSC1G_8	0.651389	0.0342826	0.0233973	0.052576	3.31076e-06	6.2971e-05	0.0360654	3.75436e-06	0.000104099	7.35181	17/01/2018	6Hz	27 μm	~3 J/cm2	Spot	-	7800
USGS GSC-1G	GSC1G_9	0.615506	0.0323577	0.0221233	0.0525449	3.99327e-06	7.59972e-05	0.036031	4.155e-06	0.000115317	7.00848	17/01/2018	6Hz	27 μm	~3 J/cm2	Spot	-	7800
USGS GSC-1G	GSC1G_10	0.605917	0.0318755	0.0217797	0.0525315	4.51464e-06	8.59415e-05	0.0360097	3.51517e-06	9.76173e-05	6.88423	17/01/2018	6Hz	27 μm	~3 J/cm2	Spot	-	7800
SRM NIST 612	NIST_1	0.554425	0.0291579	0.0199449	0.0525288	3.17876e-06	6.05145e-05	0.0360184	2.28728e-06	6.35031e-05	12.4939	17/01/2018	6Hz	27 μm	~3 J/cm2	Line	1.6 µm/s	7800
SRM NIST 612	NIST_2	0.559102	0.0293966	0.0201322	0.0525251	3.06853e-06	5.84203e-05	0.0360187	2.14006e-06	5.94151e-05	12.36	17/01/2018	6Hz	27 μm	~3 J/cm2	Line	1.6 µm/s	7800
SRM NIST 612	NIST_3	0.547921	0.0288118	0.0197385	0.0525238	3.08909e-06	5.88132e-05	0.036013	2.6512e-06	7.36181e-05	12.3129	17/01/2018	6Hz	27 μm	~3 J/cm2	Line	1.6 µm/s	7800
SRM NIST 612	NIST_4	0.517731	0.0272102	0.0186447	0.0525174	3.06758e-06	5.84107e-05	0.036005	3.15067e-06	8.75064e-05	12.2777	17/01/2018	6Hz	27 μm	~3 J/cm2	Line	1.6 µm/s	7800
SRM NIST 612	NIST_5	0.500884	0.0263347	0.0180604	0.0525133	2.8716e-06	5.46833e-05	0.0360037	3.11287e-06	8.64596e-05	12.0544	17/01/2018	6Hz	27 μm	~3 J/cm2	Line	1.6 µm/s	7800
SRM NIST 612	NIST_6	0.498302	0.0262034	0.0179434	0.0525163	3.02228e-06	5.75494e-05	0.0360077	3.10525e-06	8.62385e-05	12.0301	17/01/2018	6Hz	27 μm	~3 J/cm2	Line	1.6 µm/s	7800
SRM NIST 612	NIST_7	0.509445	0.0267761	0.0183261	0.0525267	2.7745e-06	5.28207e-05	0.0360196	3.2749e-06	9.09199e-05	12.0951	17/01/2018	6Hz	27 μm	~3 J/cm2	Line	1.6 µm/s	7800
SRM NIST 612	NIST_8	0.517819	0.0272259	0.0186208	0.0525329	3.21206e-06	6.11438e-05	0.0360283	2.95552e-06	8.20332e-05	12.2284	17/01/2018	6Hz	27 μm	~3 J/cm2	Line	1.6 µm/s	7800
SRM NIST 612	NIST_9	0.526613	0.0276848	0.018965	0.0525426	2.77857e-06	5.28822e-05	0.0360372	2.71857e-06	7.54379e-05	12.3191	17/01/2018	6Hz	27 μm	~3 J/cm2	Line	1.6 µm/s	7800
SRM NIST 612	NIST_10	0.544212	0.0286205	0.0195881	0.05255	2.74808e-06	5.22945e-05	0.0360511	3.28232e-06	9.10462e-05	12.4772	17/01/2018	6Hz	27 μm	~3 J/cm2	Line	1.6 µm/s	7800
SRM NIST 612	NIST_end	0.539483	0.0283636	0.0194163	0.0525479	3.52395e-06	6.70617e-05	0.0360474	2.80973e-06	7.79455e-05	12.4216	17/01/2018	6Hz	27 μm	~3 J/cm2	Line	1.6 µm/s	7800
91500	91500-Plesovice_10	0.332749	0.0175149	0.0119461	0.0525807	3.48738e-06	6.63243e-05	0.0360879	2.79293e-06	7.73923e-05	8.74198	22/03/2018	6Hz	33 μm	~3 J/cm2	Line	1.6 µm/s	7800
91500	91500-AS3_10	0.333162	0.0175398	0.0119693	0.0525822	3.23085e-06	6.14438e-05	0.0360833	3.03298e-06	8.4055e-05	8.67869	22/03/2018	6Hz	33 μm	~3 J/cm2	Line	1.6 µm/s	7800
91500	AS3-91500_end_10	0.335295	0.0176639	0.0120451	0.0525794	3.33023e-06	6.33371e-05	0.036086	3.47321e-06	9.62481e-05	8.70649	22/03/2018	6Hz	33 μm	~3 J/cm2	Line	1.6 µm/s	7800
91500	AS3-91500_end_10bis	0.335647	0.0176627	0.0120539	0.0525809	3.71548e-06	7.06621e-05	0.0360875	2.59335e-06	7.18629e-05	8.67606	22/03/2018	6Hz	33 μm	~3 J/cm2	Line	1.6 µm/s	7800
91500	91500-MudTank_10	0.342391	0.0180279	0.0123273	0.0525872	3.70271e-06	7.04108e-05	0.0360922	3.09528e-06	8.57604e-05	8.81728	22/03/2018	6Hz	33 μm	~3 J/cm2	Line	1.6 µm/s	7800
91500	91500-AS3_9	0.35384	0.0186375	0.0127055	0.0525908	3.43639e-06	6.53421e-05	0.0361022	3.1101e-06	8.6147e-05	8.9453	22/03/2018	6Hz	33 μm	~3 J/cm2	Line	1.6 µm/s	7800
91500	91500-Plesovice_9	0.362257	0.0190972	0.0130459	0.0526036	3.02528e-06	5.75109e-05	0.0361135	2.71403e-06	7.51527e-05	9.0574	22/03/2018	6Hz	33 μm	~3 J/cm2	Line	1.6 µm/s	7800
91500	91500-Plesovice_6	0.370769	0.0195451	0.0133645	0.0526358	3.13881e-06	5.96326e-05	0.0361592	3.04229e-06	8.4136e-05	9.84185	22/03/2018	6Hz	33 μm	~3 J/cm2	Line	1.6 µm/s	7800
91500	91500-MUN4_6	0.371201	0.0195585	0.0133681	0.052637	3.74571e-06	7.11613e-05	0.0361633	2.71188e-06	7.49897e-05	9.95546	22/03/2018	6Hz	33 μm	~3 J/cm2	Line	1.6 µm/s	7800
91500	91500-MudTank_9	0.372748	0.0196453	0.0134178	0.0526078	3.44306e-06	6.54478e-05	0.0361169	2.66554e-06	7.38029e-05	8.92857	22/03/2018	6Hz	33 μm	~3 J/cm2	Line	1.6 µm/s	7800
91500	AS3-91500_end_8	0.378734	0.0199474	0.0136248	0.0526077	2.74841e-06	5.22435e-05	0.0361221	2.93556e-06	8.12677e-05	9.57521	22/03/2018	6Hz	33 μm	~3 J/cm2	Line	1.6 µm/s	7800
91500	91500-MUN1_7	0.378925	0.019981	0.0136385	0.0526318	3.52109e-06	6.69005e-05	0.036157	3.13765e-06	8.67784e-05	9.80853	22/03/2018	6Hz	33 μm	~3 J/cm2	Line	1.6 µm/s	7800
91500	91500-R33_6	0.378799	0.019973	0.013643	0.0526406	3.11992e-06	5.92683e-05	0.0361675	2.88492e-06	7.97654e-05	9.98848	22/03/2018	6Hz	33 μm	~3 J/cm2	Line	1.6 µm/s	7800
91500	91500-QGNG_8	0.380097	0.0200353	0.0136596	0.0526177	3.2383e-06	6.15439e-05	0.0361339	2.9662e-06	8.20892e-05	9.60254	22/03/2018	6Hz	33 μm	~3 J/cm2	Line	1.6 µm/s	7800
91500	91500-Peixe_6	0.380363	0.0200432	0.0136956	0.0526376	3.33206e-06	6.33018e-05	0.0361596	2.76391e-06	7.64366e-05	9.57544	22/03/2018	6Hz	33 μm	~3 J/cm2	Line	1.6 µm/s	7800
91500	91500-MUN3_6	0.381259	0.0201036	0.0137412	0.0526386	2.51847e-06	4.78445e-05	0.0361662	3.13308e-06	8.663e-05	9.98349	22/03/2018	6Hz	33 μm	~3 J/cm2	Line	1.6 µm/s	7800
91500	91500-MUN0_7	0.381836	0.0201327	0.0137576	0.0526333	3.33857e-06	6.34307e-05	0.0361537	2.85278e-06	7.8907e-05	9.7817	22/03/2018	6Hz	33 μm	~3 J/cm2	Line	1.6 µm/s	7800
91500	91500-AS3_8	0.382215	0.0201408	0.0137607	0.052616	3.90172e-06	7.41546e-05	0.0361304	2.57754e-06	7.134e-05	9.47256	22/03/2018	6Hz	33 μm	~3 J/cm2	Line	1.6 µm/s	7800
91500	91500-Peixe_8	0.382897	0.0201806	0.0137929	0.0526192	2.82979e-06	5.37787e-05	0.0361379	3.06813e-06	8.49007e-05	9.64392	22/03/2018	6Hz	33 μm	~3 J/cm2	Line	1.6 µm/s	7800
91500	91500-MudTank_7	0.38363	0.0202096	0.0138303	0.0526346	2.86642e-06	5.44589e-05	0.0361583	2.24083e-06	6.19727e-05	9.85367	22/03/2018	6Hz	33 μm	~3 J/cm2	Line	1.6 µm/s	7800
91500	91500-MUN3_7	0.385465	0.0203152	0.0138826	0.0526341	2.96142e-06	5.62642e-05	0.0361562	2.47805e-06	6.85373e-05	9.88605	22/03/2018	6Hz	33 μm	~3 J/cm2	Line	1.6 µm/s	7800
91500	AS3-91500_end_6	0.386081	0.0203565	0.0139261	0.0526364	3.81683e-06	7.25131e-05	0.0361627	3.01129e-06	8.32708e-05	9.80984	22/03/2018	6Hz	33 μm	~3 J/cm2	Line	1.6 µm/s	7800
91500	91500-R33_8	0.388646	0.0204788	0.0139914	0.052622	2.93356e-06	5.57479e-05	0.0361399	2.1387e-06	5.91785e-05	9.72181	22/03/2018	6Hz	33 μm	~3 J/cm2	Line	1.6 µm/s	7800
91500	91500-AS3_6	0.39142	0.0206325	0.0141114	0.0526349	3.00981e-06	5.71827e-05	0.0361636	2.46875e-06	6.82663e-05	9.8947	22/03/2018	6Hz	33 μm	~3 J/cm2	Line	1.6 µm/s	7800
91500	AS3-91500_end_3	0.391716	0.0206356	0.0141252	0.052623	3.68041e-06	6.99392e-05	0.0361436	2.87027e-06	7.94129e-05	8.93251	22/03/2018	6Hz	33 μm	~3 J/cm2	Line	1.6 µm/s	7800
91500	91500-QGNG_6	0.392175	0.0206702	0.0141436	0.0526374	3.47804e-06	6.60756e-05	0.0361644	2.9185e-06	8.0701e-05	9.79173	22/03/2018	6Hz	33 μm	~3 J/cm2	Line	1.6 µm/s	7800
91500	91500-Plesovice_8	0.393369	0.0207309	0.0141602	0.0526248	4.02729e-06	7.65284e-05	0.0361443	2.75462e-06	7.62117e-05	9.57208	22/03/2018	6Hz	33 μm	~3 J/cm2	Line	1.6 µm/s	7800
91500	91500-MUN4_7	0.395994	0.020876	0.0142684	0.052634	2.91362e-06	5.53562e-05	0.0361585	2.98672e-06	8.26007e-05	9.60438	22/03/2018	6Hz	33 μm	~3 J/cm2	Line	1.6 µm/s	7800
91500	91500-R33_7	0.396558	0.0209007	0.0143043	0.0526381	3.59781e-06	6.835e-05	0.0361606	3.00766e-06	8.31751e-05	9.76294	22/03/2018	6Hz	33 μm	~3 J/cm2	Line	1.6 µm/s	7800
91500	91500-Plesovice_7	0.397282	0.0209354	0.0143093	0.0526349	3.3187e-06	6.30513e-05	0.0361616	3.01798e-06	8.3458e-05	9.45398	22/03/2018	6Hz	33 μm	~3 J/cm2	Line	1.6 µm/s	7800
91500	91500-MUN1_6	0.398604	0.0210153	0.0143609	0.0526485	3.72557e-06	7.07632e-05	0.0361785	2.12644e-06	5.87763e-05	10.2255	22/03/2018	6Hz	33 μm	~3 J/cm2	Line	1.6 µm/s	7800
91500	91500-Peixe_7	0.400323	0.0210962	0.0144141	0.0526346	2.88804e-06	5.48695e-05	0.0361622	2.7654e-06	7.64722e-05	9.94729	22/03/2018	6Hz	33 μm	~3 J/cm2	Line	1.6 µm/s	7800
91500	91500-AS3_3	0.400539	0.0210909	0.0144205	0.0526311	3.28562e-06	6.24274e-05	0.0361559	2.8273e-06	7.81974e-05	8.8966	22/03/2018	6Hz	33 μm	~3 J/cm2	Line	1.6 µm/s	7800
91500	91500-MUN4_8	0.40419	0.0212813	0.0145528	0.0526355	2.54776e-06	4.84039e-05	0.0361562	2.81061e-06	7.77352e-05	9.94831	22/03/2018	6Hz	33 μm	~3 J/cm2	Line	1.6 µm/s	7800
91500	91500-QGNG_7	0.40568	0.0213888	0.0146051	0.0526402	2.39291e-06	4.54579e-05	0.0361674	2.49973e-06	6.91154e-05	9.98714	22/03/2018	6Hz	33 μm	~3 J/cm2	Line	1.6 µm/s	7800
91500	91500-QGNG_5	0.408019	0.0215194	0.0147168	0.0526626	2.99827e-06	5.69335e-05	0.0361982	2.4215e-06	6.68957e-05	10.5988	22/03/2018	6Hz	33 μm	~3 J/cm2	Line	1.6 µm/s	7800
91500	91500-Peixe_5	0.409623	0.021607	0.014781	0.0526639	3.71275e-06	7.0499e-05	0.0361991	2.61427e-06	7.22192e-05	10.5335	22/03/2018	6Hz	33 μm	~3 J/cm2	Line	1.6 µm/s	7800
91500	91500-AS3_5	0.410303	0.0216357	0.0147979	0.0526587	3.29755e-06	6.26212e-05	0.0361995	2.80415e-06	7.74637e-05	10.5182	22/03/2018	6Hz	33 μm	~3 J/cm2	Line	1.6 µm/s	7800
91500	AS3-91500_end_1	0.411778	0.0216487	0.0148307	0.0525771	3.50407e-06	6.66463e-05	0.0360812	2.91081e-06	8.06739e-05	8.60849	22/03/2018	6Hz	33 μm	~3 J/cm2	Line	1.6 µm/s	7800
91500	91500-MUN0_6	0.412311	0.0217356	0.014879	0.0526568	3.00055e-06	5.69832e-05	0.036191	2.94694e-06	8.14274e-05	10.3615	22/03/2018	6Hz	33 μm	~3 J/cm2	Line	1.6 µm/s	7800
91500	91500-MUN3_8	0.413146	0.0217744	0.0148831	0.0526395	3.72512e-06	7.07667e-05	0.036163	2.99057e-06	8.26968e-05	9.88638	22/03/2018	6Hz	33 μm	~3 J/cm2	Line	1.6 µm/s	7800
91500	91500-AS3_7	0.413734	0.0218084	0.0148997	0.0526394	3.43406e-06	6.52374e-05	0.0361689	2.34441e-06	6.48184e-05	10.0835	22/03/2018	6Hz	33 μm	~3 J/cm2	Line	1.6 µm/s	7800
91500	AS3-91500_end_5	0.415557	0.0219124	0.0149798	0.0526609	2.8405e-06	5.39396e-05	0.0361905	2.45787e-06	6.79148e-05	10.0431	22/03/2018	6Hz	33 μm	~3 J/cm2	Line	1.6 µm/s	7800
91500	91500-MudTank_6	0.418502	0.0220727	0.0150995	0.0526631	2.65768e-06	5.04656e-05	0.0361977	2.86004e-06	7.90117e-05	10.2952	22/03/2018	6Hz	33 μm	~3 J/cm2	Line	1.6 µm/s	7800
91500	91500-R33_5	0.418306	0.0220756	0.0151058	0.0526648	3.40922e-06	6.47344e-05	0.0362042	2.07435e-06	5.72957e-05	10.6087	22/03/2018	6Hz	33 μm	~3 J/cm2	Line	1.6 µm/s	7800
91500	91500-MUN1_8	0.421925	0.0222504	0.0152081	0.052642	3.69727e-06	7.02341e-05	0.0361656	3.03626e-06	8.39543e-05	9.80759	22/03/2018	6Hz	33 μm	~3 J/cm2	Line	1.6 µm/s	7800
91500	AS3-91500_end_7	0.424407	0.0223912	0.0153048	0.0526471	2.9469e-06	5.59745e-05	0.036176	1.9861e-06	5.49011e-05	10.2836	22/03/2018	6Hz	33 μm	~3 J/cm2	Line	1.6 µm/s	7800
91500	91500-AS3_1	0.425474	0.0223922	0.015332	0.0525946	2.9333e-06	5.57719e-05	0.0361059	3.58615e-06	9.9323e-05	8.65606	22/03/2018	6Hz	33 μm	~3 J/cm2	Line	1.6 µm/s	7800
91500	91500-QGNG_3	0.425417	0.0224028	0.015347	0.0526415	3.30523e-06	6.27875e-05	0.036171	2.96166e-06	8.18795e-05	9.61689	22/03/2018	6Hz	33 μm	~3 J/cm2	Line	1.6 µm/s	7800
91500	91500-MUN0_8	0.427623	0.0225329	0.0154125	0.0526426	2.3811e-06	4.52315e-05	0.036174	2.69997e-06	7.46383e-05	10.2104	22/03/2018	6Hz	33 μm	~3 J/cm2	Line	1.6 µm/s	7800
91500	91500-MudTank_8	0.427521	0.0225408	0.0154156	0.052646	3.71576e-06	7.05801e-05	0.0361753	2.0355e-06	5.62678e-05	10.3805	22/03/2018	6Hz	33 μm	~3 J/cm2	Line	1.6 µm/s	7800
91500	91500-Plesovice_5	0.434624	0.0229339	0.0157182	0.0526775	3.67717e-06	6.98054e-05	0.036219	2.64856e-06	7.31264e-05	10.5606	22/03/2018	6Hz	33 μm	~3 J/cm2	Line	1.6 µm/s	7800
91500	91500-QGNG_1	0.442911	0.0233216	0.0159618	0.0525989	3.96728e-06	7.54252e-05	0.036117	2.81632e-06	7.79776e-05	8.96213	22/03/2018	6Hz	33 μm	~3 J/cm2	Line	1.6 µm/s	7800
91500	91500-MUN4_5	0.447444	0.0236058	0.0161648	0.0526805	3.28324e-06	6.23236e-05	0.0362249	2.20633e-06	6.09064e-05	10.8823	22/03/2018	6Hz	33 μm	~3 J/cm2	Line	1.6 µm/s	7800
91500	91500-Peixe_3	0.451863	0.0238039	0.0163177	0.0526574	3.16313e-06	6.007e-05	0.0361941	2.64706e-06	7.31351e-05	10.098	22/03/2018	6Hz	33 μm	~3 J/cm2	Line	1.6 µm/s	7800
91500	91500-Peixe_1	0.465916	0.0245294	0.0167987	0.0526102	3.56703e-06	6.78012e-05	0.0361324	2.34657e-06	6.49438e-05	9.4185	22/03/2018	6Hz	33 μm	~3 J/cm2	Line	1.6 µm/s	7800
91500	91500-MUN3_5	0.464487	0.0244989	0.0168029	0.0526917	2.86052e-06	5.42879e-05	0.0362365	2.6495e-06	7.3117e-05	11.0351	22/03/2018	6Hz	33 μm	~3 J/cm2	Line	1.6 µm/s	7800
91500	91500-R33_3	0.468165	0.0246889	0.0169055	0.0526643	2.55766e-06	4.85653e-05	0.0362036	2.71092e-06	7.48799e-05	10.3215	22/03/2018	6Hz	33 μm	~3 J/cm2	Line	1.6 µm/s	7800
91500	91500-MUN1_5	0.475507	0.0250864	0.0172163	0.0526973	2.57621e-06	4.8887e-05	0.0362498	2.68018e-06	7.39365e-05	11.0035	22/03/2018	6Hz	33 μm	~3 J/cm2	Line	1.6 µm/s	7800
91500	91500-MUN0_5	0.476694	0.0251419	0.0172545	0.0526962	3.20173e-06	6.07583e-05	0.0362507	2.42951e-06	6.70196e-05	11.3956	22/03/2018	6Hz	33 μm	~3 J/cm2	Line	1.6 µm/s	7800
91500	91500-MudTank_5	0.479574	0.0252758	0.0173541	0.0526953	2.316e-06	4.39508e-05	0.0362466	2.62992e-06	7.25563e-05	11.5587	22/03/2018	6Hz	33 μm	~3 J/cm2	Line	1.6 µm/s	7800
91500	91500-R33_1	0.481332	0.0253502	0.017393	0.0526274	3.16071e-06	6.00583e-05	0.0361557	2.31803e-06	6.41126e-05	9.77537	22/03/2018	6Hz	33 μm	~3 J/cm2	Line	1.6 µm/s	7800
91500	91500-Plesovice_1	0.486543	0.0256244	0.0175746	0.0526328	2.80553e-06	5.33038e-05	0.0361625	2.58361e-06	7.14445e-05	9.74214	22/03/2018	6Hz	33 μm	~3 J/cm2	Line	1.6 µm/s	7800
91500	91500-Plesovice_3	0.491704	0.0259194	0.0177524	0.0526782	3.40788e-06	6.46924e-05	0.0362205	2.40088e-06	6.62852e-05	10.2345	22/03/2018	6Hz	33 μm	~3 J/cm2	Line	1.6 µm/s	7800
91500	91500-MUN4_1	0.494235	0.0260187	0.0178694	0.052639	3.76706e-06	7.15641e-05	0.036175	2.13258e-06	5.89517e-05	9.87969	22/03/2018	6Hz	33 μm	~3 J/cm2	Line	1.6 µm/s	7800
91500	91500-MUN4_3	0.50436	0.0265916	0.0182583	0.0526855	3.388e-06	6.43061e-05	0.0362307	3.48914e-06	9.63034e-05	10.6585	22/03/2018	6Hz	33 μm	~3 J/cm2	Line	1.6 µm/s	7800
91500	91500-MUN3_1	0.505762	0.0266206	0.0182823	0.052643	2.96866e-06	5.63922e-05	0.0361801	3.1441e-06	8.69014e-05	9.96903	22/03/2018	6Hz	33 μm	~3 J/cm2	Line	1.6 µm/s	7800
91500	91500-AS3_4	0.512964	0.0270751	0.018567	0.0527162	2.63589e-06	5.00015e-05	0.0362746	2.02362e-06	5.57862e-05	11.8662	22/03/2018	6Hz	33 μm	~3 J/cm2	Line	1.6 µm/s	7800
91500	91500-QGNG_4	0.513668	0.0271207	0.0185939	0.0527177	3.2545e-06	6.17344e-05	0.0362744	2.02982e-06	5.59574e-05	11.8859	22/03/2018	6Hz	33 μm	~3 J/cm2	Line	1.6 µm/s	7800
91500	AS3-91500_end_4	0.513601	0.0271125	0.0185964	0.052711	3.72222e-06	7.06157e-05	0.0362721	2.36905e-06	6.53135e-05	11.9075	22/03/2018	6Hz	33 μm	~3 J/cm2	Line	1.6 µm/s	7800
91500	91500-Peixe_4	0.51488	0.0271771	0.0186523	0.05272	3.38829e-06	6.42695e-05	0.0362834	2.06467e-06	5.6904e-05	11.5819	22/03/2018	6Hz	33 μm	~3 J/cm2	Line	1.6 µm/s	7800
91500	91500-MUN3_3	0.518625	0.0273734	0.0187679	0.0526921	3.42316e-06	6.49653e-05	0.0362434	2.60272e-06	7.18124e-05	10.4507	22/03/2018	6Hz	33 μm	~3 J/cm2	Line	1.6 µm/s	7800
91500	91500-R33_4	0.519054	0.0273688	0.0188	0.0527224	3.21266e-06	6.09354e-05	0.036285	2.52288e-06	6.95297e-05	11.8623	22/03/2018	6Hz	33 μm	~3 J/cm2	Line	1.6 µm/s	7800
91500	91500-MUN1_1	0.520846	0.0274247	0.0188122	0.0526574	3.07938e-06	5.84795e-05	0.0361888	2.27493e-06	6.28629e-05	10.27	22/03/2018	6Hz	33 μm	~3 J/cm2	Line	1.6 µm/s	7800
91500	91500-Plesovice_4	0.523227	0.0276053	0.0189541	0.0527258	2.43723e-06	4.62246e-05	0.0362883	2.13108e-06	5.87264e-05	11.5577	22/03/2018	6Hz	33 μm	~3 J/cm2	Line	1.6 µm/s	7800
91500	91500-MUN0_1	0.529216	0.0278778	0.0191153	0.0526594	3.11979e-06	5.92446e-05	0.0361954	2.46509e-06	6.81052e-05	10.3865	22/03/2018	6Hz	33 μm	~3 J/cm2	Line	1.6 µm/s	7800
91500	91500-MUN4_4	0.529481	0.0279751	0.0191921	0.0527293	3.13451e-06	5.94454e-05	0.0362993	2.30175e-06	6.34102e-05	12.2285	22/03/2018	6Hz	33 μm	~3 J/cm2	Line	1.6 µm/s	7800
91500	91500-QGNG_2	0.53095	0.0279943	0.0192325	0.0527087	2.50558e-06	4.75364e-05	0.0362684	2.94694e-06	8.12536e-05	11.3027	22/03/2018	6Hz	33 μm	~3 J/cm2	Line	1.6 µm/s	7800
91500	91500-MudTank_4	0.530942	0.0280158	0.0192503	0.0527397	2.91263e-06	5.52265e-05	0.0363073	2.21221e-06	6.09301e-05	11.9019	22/03/2018	6Hz	33 μm	~3 J/cm2	Line	1.6 µm/s	7800
91500	91500-MUN1_3	0.532374	0.0280544	0.019269	0.052697	3.3165e-06	6.29353e-05	0.0362502	2.23762e-06	6.17272e-05	10.5715	22/03/2018	6Hz	33 μm	~3 J/cm2	Line	1.6 µm/s	7800
91500	91500-MUN0_2	0.532866	0.0281041	0.0193117	0.0527198	3.77773e-06	7.16567e-05	0.0362863	2.15358e-06	5.93497e-05	11.8055	22/03/2018	6Hz	33 μm	~3 J/cm2	Line	1.6 µm/s	7800
91500	91500-AS3_2	0.532828	0.0281084	0.0193174	0.0527092	3.6812e-06	6.98399e-05	0.0362657	2.22291e-06	6.12953e-05	11.4526	22/03/2018	6Hz	33 μm	~3 J/cm2	Line	1.6 µm/s	7800
91500	91500-MUN1_2	0.533399	0.0281392	0.0193301	0.0527208	4.00612e-06	7.59874e-05	0.036283	1.85142e-06	5.10272e-05	11.7429	22/03/2018	6Hz	33 μm	~3 J/cm2	Line	1.6 µm/s	7800
91500	91500-Peixe_2	0.534666	0.0281806	0.019388	0.0527105	2.25647e-06	4.28088e-05	0.0362701	2.17542e-06	5.99785e-05	11.2889	22/03/2018	6Hz	33 μm	~3 J/cm2	Line	1.6 µm/s	7800
91500	91500-R33_2	0.535454	0.0282322	0.0194036	0.0527123	3.42759e-06	6.50243e-05	0.0362711	2.71727e-06	7.49154e-05	10.9672	22/03/2018	6Hz	33 μm	~3 J/cm2	Line	1.6 µm/s	7800
91500	91500-MUN0_3	0.536481	0.0282814	0.0194155	0.0526978	2.7972e-06	5.308e-05	0.0362549	2.76643e-06	7.63048e-05	10.4832	22/03/2018	6Hz	33 μm	~3 J/cm2	Line	1.6 µm/s	7800
91500	91500-Plesovice_2	0.537062	0.0283434	0.0194583	0.0527173	3.3448e-06	6.3448e-05	0.0362801	2.11667e-06	5.83424e-05	10.7876	22/03/2018	6Hz	33 μm	~3 J/cm2	Line	1.6 µm/s	7800
91500	91500-MUN3_4	0.537983	0.0283927	0.019487	0.0527316	3.08172e-06	5.84416e-05	0.0362998	2.27795e-06	6.27537e-05	12.3746	22/03/2018	6Hz	33 μm	~3 J/cm2	Line	1.6 µm/s	7800
91500	91500-MudTank_2	0.537958	0.0283754	0.0195052	0.0527218	3.20977e-06	6.08813e-05	0.0362832	2.36207e-06	6.5101e-05	11.7425	22/03/2018	6Hz	33 μm	~3 J/cm2	Line	1.6 µm/s	7800
91500	91500-MUN0_4	0.538372	0.0284161	0.0195071	0.0527354	2.49447e-06	4.73015e-05	0.0363036	2.47831e-06	6.82665e-05	12.1425	22/03/2018	6Hz	33 μm	~3 J/cm2	Line	1.6 µm/s	7800
91500	91500-MudTank_3	0.539162	0.0284242	0.0195118	0.0527105	2.9747e-06	5.64347e-05	0.0362671	2.79925e-06	7.71845e-05	11.2718	22/03/2018	6Hz	33 μm	~3 J/cm2	Line	1.6 µm/s	7800
91500	AS3-91500_end_2	0.540127	0.0284916	0.0195538	0.0527135	2.58895e-06	4.91137e-05	0.0362717	2.64726e-06	7.29841e-05	11.4888	22/03/2018	6Hz	33 μm	~3 J/cm2	Line	1.6 µm/s	7800
91500	91500-MUN1_4	0.540749	0.028527	0.0195886	0.0527328	3.86654e-06	7.33233e-05	0.0363002	2.86182e-06	7.88377e-05	12.3874	22/03/2018	6Hz	33 μm	~3 J/cm2	Line	1.6 µm/s	7800
91500	91500-MudTank_1	0.543081	0.0286129	0.0196262	0.0526653	2.99802e-06	5.69259e-05	0.0362091	2.42677e-06	6.70212e-05	10.6403	22/03/2018	6Hz	33 μm	~3 J/cm2	Line	1.6 µm/s	7800
91500	91500-MUN4_2	0.541838	0.0285849	0.0196298	0.0527197	2.57836e-06	4.89069e-05	0.03628	2.1266e-06	5.86163e-05	11.7686	22/03/2018	6Hz	33 μm	~3 J/cm2	Line	1.6 µm/s	7800
91500	91500-MUN3_2	0.542269	0.0286016	0.0196379	0.0527215	2.51239e-06	4.76539e-05	0.0362861	2.77062e-06	7.63549e-05	11.7427	22/03/2018	6Hz	33 μm	~3 J/cm2	Line	1.6 µm/s	7800
91500	91500_4	0.546865	0.0287957	0.0197785	0.0526715	3.4068e-06	6.46802e-05	0.0362129	3.03668e-06	8.38563e-05	10.52	22/03/2018	6Hz	33 μm	~3 J/cm2	Line	1.6 µm/s	7800
91500	91500_3	0.5485	0.0289001	0.0198579	0.0526697	3.48855e-06	6.62345e-05	0.0362122	2.17747e-06	6.01309e-05	10.4631	22/03/2018	6Hz	33 μm	~3 J/cm2	Line	1.6 µm/s	7800
91500	91500_2	0.55444	0.0292235	0.020065	0.0526711	2.91699e-06	5.53812e-05	0.0362144	2.86409e-06	7.90869e-05	10.6399	22/03/2018	6Hz	33 μm	~3 J/cm2	Line	1.6 µm/s	7800
91500	91500_1	0.557756	0.0293991	0.0201681	0.0526685	2.71024e-06	5.14585e-05	0.0362142	2.91559e-06	8.05095e-05	10.5497	22/03/2018	6Hz	33 μm	~3 J/cm2	Line	1.6 µm/s	7800
AS3	AS3_10	0.332155	0.0174755	0.0119256	0.0525752	3.52761e-06	6.70965e-05	0.0360805	3.54414e-06	9.82289e-05	8.92055	22/03/2018	6Hz	33 μm	~3 J/cm2	Line	1.6 µm/s	7800
AS3	AS3_9	0.34727	0.018286	0.0124704	0.0525883	2.78242e-06	5.29095e-05	0.0360961	2.95021e-06	8.1732e-05	9.29655	22/03/2018	6Hz	33 μm	~3 J/cm2	Line	1.6 µm/s	7800
AS3	AS3_8	0.380537	0.0200479	0.0136865	0.052609	3.90299e-06	7.41885e-05	0.036126	3.38566e-06	9.37181e-05	9.64405	22/03/2018	6Hz	33 μm	~3 J/cm2	Line	1.6 µm/s	7800
AS3	AS3_6	0.385987	0.0203392	0.013912	0.052625	2.83079e-06	5.37917e-05	0.036146	2.01104e-06	5.56366e-05	10.7127	22/03/2018	6Hz	33 μm	~3 J/cm2	Line	1.6 µm/s	7800
AS3	AS3_3	0.392156	0.0206693	0.0141546	0.0526218	3.23863e-06	6.15453e-05	0.036147	3.01331e-06	8.33626e-05	9.85325	22/03/2018	6Hz	33 μm	~3 J/cm2	Line	1.6 µm/s	7800
AS3	AS3_5	0.413165	0.0218009	0.014917	0.052659	3.71921e-06	7.06283e-05	0.0361904	2.24446e-06	6.20182e-05	10.8612	22/03/2018	6Hz	33 μm	~3 J/cm2	Line	1.6 µm/s	7800
AS3	AS3_1	0.416139	0.0218938	0.0149642	0.0525837	3.36831e-06	6.40562e-05	0.0360974	3.36529e-06	9.3228e-05	8.88116	22/03/2018	6Hz	33 μm	~3 J/cm2	Line	1.6 µm/s	7800
AS3	AS3_7	0.417747	0.0220203	0.0150551	0.0526407	2.5074e-06	4.76324e-05	0.036166	2.45793e-06	6.79626e-05	10.3845	22/03/2018	6Hz	33 μm	~3 J/cm2	Line	1.6 µm/s	7800
AS3	AS3_4	0.512605	0.0270556	0.0185646	0.0527092	3.06118e-06	5.80768e-05	0.0362647	3.28702e-06	9.06397e-05	12.5221	22/03/2018	6Hz	33 μm	~3 J/cm2	Line	1.6 µm/s	7800
AS3	AS3_2	0.534568	0.0281859	0.0193399	0.0527046	3.36353e-06	6.38186e-05	0.0362544	3.18586e-06	8.78752e-05	11.8148	22/03/2018	6Hz	33 μm	~3 J/cm2	Line	1.6 µm/s	7800
MudTank	MudTank_10	0.337286	0.0177519	0.0121107	0.0525786	2.65444e-06	5.04852e-05	0.0360792	2.95557e-06	8.1919e-05	7.94202	22/03/2018	6Hz	33 μm	~3 J/cm2	Line	1.6 µm/s	7800
MudTank	MudTank_9	0.368996	0.0194271	0.0132804	0.0526047	3.84861e-06	7.31609e-05	0.0361108	3.88853e-06	0.000107683	8.74286	22/03/2018	6Hz	33 μm	~3 J/cm2	Line	1.6 µm/s	7800
MudTank	MudTank_7	0.385393	0.0203359	0.0138906	0.0526292	4.46211e-06	8.47838e-05	0.0361518	2.95693e-06	8.1792e-05	8.38508	22/03/2018	6Hz	33 μm	~3 J/cm2	Line	1.6 µm/s	7800
MudTank	MudTank_6	0.418489	0.0220655	0.015098	0.0526515	3.23838e-06	6.15059e-05	0.0361865	2.62592e-06	7.25664e-05	8.69274	22/03/2018	6Hz	33 μm	~3 J/cm2	Line	1.6 µm/s	7800
MudTank	MudTank_8	0.428887	0.0226178	0.0154519	0.0526463	3.60098e-06	6.83994e-05	0.0361735	3.30825e-06	9.1455e-05	9.12751	22/03/2018	6Hz	33 μm	~3 J/cm2	Line	1.6 µm/s	7800
MudTank	MudTank_5	0.477781	0.0252106	0.0172914	0.0526951	3.55262e-06	6.74184e-05	0.0362426	2.85693e-06	7.88281e-05	9.49318	22/03/2018	6Hz	33 μm	~3 J/cm2	Line	1.6 µm/s	7800
MudTank	MudTank_2	0.532797	0.0281233	0.0193073	0.0527181	2.36571e-06	4.48747e-05	0.0362806	3.44553e-06	9.49688e-05	10.5332	22/03/2018	6Hz	33 μm	~3 J/cm2	Line	1.6 µm/s	7800
MudTank	MudTank_4	0.533354	0.0281599	0.0193086	0.0527377	2.97305e-06	5.63744e-05	0.0363032	1.94072e-06	5.34588e-05	10.9757	22/03/2018	6Hz	33 μm	~3 J/cm2	Line	1.6 µm/s	7800
MudTank	MudTank_3	0.541137	0.0285351	0.0195722	0.0526985	3.56747e-06	6.76959e-05	0.0362521	3.05109e-06	8.41631e-05	10.1221	22/03/2018	6Hz	33 μm	~3 J/cm2	Line	1.6 µm/s	7800
MudTank	MudTank_1	0.543664	0.0286686	0.0196735	0.0526621	3.15662e-06	5.99411e-05	0.0361962	2.96529e-06	8.19226e-05	9.81804	22/03/2018	6Hz	33 μm	~3 J/cm2	Line	1.6 µm/s	7800
MUN-0	MUN0_5	0.244152	0.0128325	0.00871978	0.0523493	1.04727e-05	0.000200054	0.0357619	1.0962e-05	0.000306526	5.0048	22/03/2018	6Hz	33 μm	~3 J/cm2	Line	1.6 µm/s	7800
MUN-0	MUN0_6	0.289324	0.0152247	0.0103619	0.0525266	5.11219e-06	9.73257e-05	0.0360077	7.47441e-06	0.000207578	7.86799	22/03/2018	6Hz	33 μm	~3 J/cm2	Line	1.6 µm/s	7800
MUN-0	MUN0_7	0.380718	0.0200618	0.013733	0.0525892	3.36856e-06	6.40541e-05	0.0360953	2.86534e-06	7.93826e-05	9.30055	22/03/2018	6Hz	33 μm	~3 J/cm2	Line	1.6 µm/s	7800
MUN-0	MUN0_2	0.399652	0.0210376	0.0143811	0.0526406	5.31969e-06	0.000101057	0.0361668	7.54681e-06	0.000208667	9.23149	22/03/2018	6Hz	33 μm	~3 J/cm2	Line	1.6 µm/s	7800
MUN-0	MUN0_8	0.402121	0.0211891	0.0144665	0.052565	6.03767e-06	0.000114861	0.0360621	6.61877e-06	0.000183538	8.88875	22/03/2018	6Hz	33 μm	~3 J/cm2	Line	1.6 µm/s	7800
MUN-0	MUN0_3	0.510416	0.0269011	0.0184672	0.0526411	3.79962e-06	7.21797e-05	0.0361708	3.19148e-06	8.82334e-05	9.94029	22/03/2018	6Hz	33 μm	~3 J/cm2	Line	1.6 µm/s	7800
MUN-0	MUN0_1	0.524284	0.0276354	0.0189355	0.0526219	2.34994e-06	4.4657e-05	0.0361475	2.48488e-06	6.87428e-05	9.24949	22/03/2018	6Hz	33 μm	~3 J/cm2	Line	1.6 µm/s	7800
MUN-0	MUN0_4	0.541535	0.0285651	0.0196105	0.0526904	3.57466e-06	6.78427e-05	0.0362425	2.42904e-06	6.70218e-05	10.5577	22/03/2018	6Hz	33 μm	~3 J/cm2	Line	1.6 µm/s	7800
MUN-1	MUN1_7	0.383277	0.0201989	0.0138144	0.0525864	3.21882e-06	6.121e-05	0.0360918	2.88957e-06	8.00617e-05	8.50428	22/03/2018	6Hz	33 μm	~3 J/cm2	Line	1.6 µm/s	7800
MUN-1	MUN1_6	0.392263	0.0206895	0.0141316	0.0526005	2.29088e-06	4.35524e-05	0.0361135	2.76461e-06	7.65532e-05	9.31902	22/03/2018	6Hz	33 μm	~3 J/cm2	Line	1.6 µm/s	7800
MUN-1	MUN1_8	0.418337	0.0220523	0.0150638	0.05259	3.69846e-06	7.03262e-05	0.0361016	2.47431e-06	6.85374e-05	9.10734	22/03/2018	6Hz	33 μm	~3 J/cm2	Line	1.6 µm/s	7800
MUN-1	MUN1_5	0.47571	0.0250872	0.0172091	0.0526502	2.83906e-06	5.39231e-05	0.0361836	2.12506e-06	5.87299e-05	10.2551	22/03/2018	6Hz	33 μm	~3 J/cm2	Line	1.6 µm/s	7800
MUN-1	MUN1_1	0.51652	0.0272184	0.0186558	0.0526161	4.38136e-06	8.32704e-05	0.0361329	2.80753e-06	7.77e-05	8.26317	22/03/2018	6Hz	33 μm	~3 J/cm2	Line	1.6 µm/s	7800
MUN-1	MUN1_3	0.523789	0.0276125	0.0189653	0.0526536	4.16641e-06	7.91286e-05	0.0361855	3.46849e-06	9.58529e-05	9.10823	22/03/2018	6Hz	33 μm	~3 J/cm2	Line	1.6 µm/s	7800
MUN-1	MUN1_2	0.540145	0.0284947	0.0195704	0.0526808	3.84727e-06	7.30299e-05	0.0362271	2.64641e-06	7.30505e-05	9.72266	22/03/2018	6Hz	33 μm	~3 J/cm2	Line	1.6 µm/s	7800
MUN-1	MUN1_4	0.540484	0.0285376	0.0196063	0.052687	3.26917e-06	6.20489e-05	0.0362401	2.96041e-06	8.16889e-05	11.0191	22/03/2018	6Hz	33 μm	~3 J/cm2	Line	1.6 µm/s	7800
MUN-3	MUN3_6	0.376626	0.0198476	0.0135672	0.0525926	3.59969e-06	6.84448e-05	0.0361029	3.22663e-06	8.93731e-05	9.26573	22/03/2018	6Hz	33 μm	~3 J/cm2	Line	1.6 µm/s	7800
MUN-3	MUN3_7	0.394754	0.0208074	0.0142275	0.0525923	4.24093e-06	8.06379e-05	0.0360943	2.69488e-06	7.46624e-05	9.39113	22/03/2018	6Hz	33 μm	~3 J/cm2	Line	1.6 µm/s	7800
MUN-3	MUN3_8	0.409462	0.0215791	0.0147441	0.0525981	4.97938e-06	9.46686e-05	0.0361084	2.46206e-06	6.81853e-05	9.42705	22/03/2018	6Hz	33 μm	~3 J/cm2	Line	1.6 µm/s	7800
MUN-3	MUN3_5	0.454204	0.0239353	0.0164199	0.0526453	3.40081e-06	6.45985e-05	0.0361736	3.07522e-06	8.50128e-05	10.2405	22/03/2018	6Hz	33 μm	~3 J/cm2	Line	1.6 µm/s	7800
MUN-3	MUN3_1	0.501009	0.0263964	0.0181039	0.052604	3.25083e-06	6.17981e-05	0.0361236	3.22166e-06	8.91842e-05	8.29258	22/03/2018	6Hz	33 μm	~3 J/cm2	Line	1.6 µm/s	7800
MUN-3	MUN3_3	0.510475	0.0269197	0.0184529	0.0526413	3.38178e-06	6.42418e-05	0.0361645	3.14168e-06	8.68717e-05	10.0509	22/03/2018	6Hz	33 μm	~3 J/cm2	Line	1.6 µm/s	7800
MUN-3	MUN3_4	0.536475	0.0283052	0.0194384	0.0526854	3.36022e-06	6.3779e-05	0.0362331	2.76725e-06	7.63735e-05	11.5003	22/03/2018	6Hz	33 μm	~3 J/cm2	Line	1.6 µm/s	7800
MUN-3	MUN3_2	0.54404	0.0286958	0.0197011	0.0526795	3.55866e-06	6.75529e-05	0.0362246	2.88322e-06	7.95929e-05	10.5339	22/03/2018	6Hz	33 μm	~3 J/cm2	Line	1.6 µm/s	7800
MUN-4	MUN4_6	0.369568	0.019496	0.0133295	0.0525914	3.27545e-06	6.22811e-05	0.0360947	3.11726e-06	8.63634e-05	9.05174	22/03/2018	6Hz	33 μm	~3 J/cm2	Line	1.6 µm/s	7800
MUN-4	MUN4_7	0.396886	0.0209162	0.0143016	0.0525891	3.8681e-06	7.35533e-05	0.0360936	3.04751e-06	8.44335e-05	9.30788	22/03/2018	6Hz	33 μm	~3 J/cm2	Line	1.6 µm/s	7800
MUN-4	MUN4_8	0.402766	0.0212226	0.0144965	0.0525868	3.99641e-06	7.59965e-05	0.0360921	3.14666e-06	8.7184e-05	9.19634	22/03/2018	6Hz	33 μm	~3 J/cm2	Line	1.6 µm/s	7800
MUN-4	MUN4_5	0.44203	0.0233231	0.015956	0.0526315	3.09308e-06	5.87685e-05	0.0361552	2.65733e-06	7.34978e-05	10.2198	22/03/2018	6Hz	33 μm	~3 J/cm2	Line	1.6 µm/s	7800
MUN-4	MUN4_1	0.492287	0.0259415	0.0177878	0.0525941	3.96466e-06	7.53824e-05	0.0361072	3.19904e-06	8.85984e-05	8.07007	22/03/2018	6Hz	33 μm	~3 J/cm2	Line	1.6 µm/s	7800
MUN-4	MUN4_3	0.50225	0.026474	0.0181582	0.0526347	3.69004e-06	7.01067e-05	0.0361644	2.71221e-06	7.49967e-05	9.97971	22/03/2018	6Hz	33 μm	~3 J/cm2	Line	1.6 µm/s	7800
MUN-4	MUN4_4	0.527569	0.0278404	0.0191116	0.0526795	2.56534e-06	4.86972e-05	0.0362256	2.80601e-06	7.74593e-05	11.3276	22/03/2018	6Hz	33 μm	~3 J/cm2	Line	1.6 µm/s	7800
MUN-4	MUN4_2	0.542068	0.0286098	0.0196623	0.0526814	2.84854e-06	5.4071e-05	0.0362299	2.71733e-06	7.50024e-05	10.59	22/03/2018	6Hz	33 μm	~3 J/cm2	Line	1.6 µm/s	7800
Peixe	Peixe_8	0.381968	0.0201235	0.0137408	0.0526085	3.4529e-06	6.56338e-05	0.0361237	2.92309e-06	8.09188e-05	9.5393	22/03/2018	6Hz	33 μm	~3 J/cm2	Line	1.6 µm/s	7800
Peixe	Peixe_6	0.381853	0.0201281	0.0137475	0.0526302	2.90311e-06	5.51605e-05	0.0361457	2.5453e-06	7.04178e-05	10.157	22/03/2018	6Hz	33 μm	~3 J/cm2	Line	1.6 µm/s	7800
Peixe	Peixe_7	0.400964	0.0211228	0.0144319	0.0526282	2.54226e-06	4.8306e-05	0.0361459	2.95627e-06	8.17869e-05	9.90318	22/03/2018	6Hz	33 μm	~3 J/cm2	Line	1.6 µm/s	7800
Peixe	Peixe_5	0.408984	0.0215543	0.0147632	0.0526482	3.41316e-06	6.48296e-05	0.0361826	3.03539e-06	8.38909e-05	10.6232	22/03/2018	6Hz	33 μm	~3 J/cm2	Line	1.6 µm/s	7800
Peixe	Peixe_3	0.434843	0.0229122	0.0156904	0.0526329	3.63746e-06	6.91101e-05	0.0361639	2.77679e-06	7.67836e-05	9.98015	22/03/2018	6Hz	33 μm	~3 J/cm2	Line	1.6 µm/s	7800
Peixe	Peixe_1	0.453445	0.0238885	0.0163723	0.0526027	2.95648e-06	5.6204e-05	0.0361161	3.47276e-06	9.61554e-05	8.95353	22/03/2018	6Hz	33 μm	~3 J/cm2	Line	1.6 µm/s	7800
Peixe	Peixe_4	0.512641	0.027069	0.0185728	0.0527054	3.43192e-06	6.51151e-05	0.0362659	2.68244e-06	7.39658e-05	12.0635	22/03/2018	6Hz	33 μm	~3 J/cm2	Line	1.6 µm/s	7800
Peixe	Peixe_2	0.52943	0.027927	0.0191635	0.052698	3.28953e-06	6.24222e-05	0.0362576	2.14656e-06	5.92031e-05	11.2757	22/03/2018	6Hz	33 μm	~3 J/cm2	Line	1.6 µm/s	7800
Plesovice	Plesovice_10	0.332335	0.0175108	0.0119492	0.0525714	3.19554e-06	6.07848e-05	0.0360717	3.44922e-06	9.56213e-05	9.06819	22/03/2018	6Hz	33 μm	~3 J/cm2	Line	1.6 µm/s	7800
Plesovice	Plesovice_9	0.357155	0.0188034	0.0128256	0.0525918	3.24231e-06	6.16504e-05	0.0360955	2.19174e-06	6.07206e-05	9.54172	22/03/2018	6Hz	33 μm	~3 J/cm2	Line	1.6 µm/s	7800
Plesovice	Plesovice_6	0.372564	0.0196389	0.0134216	0.0526252	3.26318e-06	6.20078e-05	0.0361511	3.08698e-06	8.53909e-05	10.2765	22/03/2018	6Hz	33 μm	~3 J/cm2	Line	1.6 µm/s	7800
Plesovice	Plesovice_8	0.388352	0.0204646	0.0139522	0.0526128	3.50503e-06	6.66193e-05	0.0361281	2.6696e-06	7.38926e-05	10.138	22/03/2018	6Hz	33 μm	~3 J/cm2	Line	1.6 µm/s	7800
Plesovice	Plesovice_7	0.396935	0.0209219	0.0143095	0.0526224	3.25294e-06	6.18166e-05	0.03615	2.65387e-06	7.34127e-05	10.3346	22/03/2018	6Hz	33 μm	~3 J/cm2	Line	1.6 µm/s	7800
Plesovice	Plesovice_5	0.42622	0.0224778	0.0153865	0.0526638	3.48633e-06	6.61998e-05	0.0361996	2.39713e-06	6.62198e-05	11.021	22/03/2018	6Hz	33 μm	~3 J/cm2	Line	1.6 µm/s	7800
Plesovice	Plesovice_3	0.477689	0.0251758	0.0172589	0.0526656	3.47441e-06	6.59712e-05	0.036202	2.21099e-06	6.10736e-05	10.6541	22/03/2018	6Hz	33 μm	~3 J/cm2	Line	1.6 µm/s	7800
Plesovice	Plesovice_1	0.480372	0.0252964	0.0173412	0.0526221	3.29675e-06	6.26496e-05	0.0361453	3.26472e-06	9.0322e-05	9.46146	22/03/2018	6Hz	33 μm	~3 J/cm2	Line	1.6 µm/s	7800
Plesovice	Plesovice_4	0.520074	0.0274457	0.0188318	0.0527158	3.19838e-06	6.06721e-05	0.0362779	1.89492e-06	5.22334e-05	12.3386	22/03/2018	6Hz	33 μm	~3 J/cm2	Line	1.6 µm/s	7800
Plesovice	Plesovice_2	0.534758	0.0282164	0.0193921	0.0527057	3.45277e-06	6.55103e-05	0.0362645	2.85562e-06	7.87441e-05	11.6301	22/03/2018	6Hz	33 μm	~3 J/cm2	Line	1.6 µm/s	7800
QGNG	QGNG_8	0.379151	0.0199909	0.0136522	0.0526043	2.97528e-06	5.65596e-05	0.0361167	3.01419e-06	8.34569e-05	9.54168	22/03/2018	6Hz	33 μm	~3 J/cm2	Line	1.6 µm/s	7800
QGNG	QGNG_6	0.391256	0.0206214	0.014072	0.0526272	3.66674e-06	6.96738e-05	0.0361485	1.76976e-06	4.8958e-05	10.2446	22/03/2018	6Hz	33 μm	~3 J/cm2	Line	1.6 µm/s	7800
QGNG	QGNG_5	0.405649	0.021404	0.0146261	0.0526507	4.10569e-06	7.79798e-05	0.0361812	2.92709e-06	8.09009e-05	10.1871	22/03/2018	6Hz	33 μm	~3 J/cm2	Line	1.6 µm/s	7800
QGNG	QGNG_7	0.409908	0.021609	0.0147528	0.0526341	3.36239e-06	6.38823e-05	0.0361537	3.27194e-06	9.05008e-05	10.2753	22/03/2018	6Hz	33 μm	~3 J/cm2	Line	1.6 µm/s	7800
QGNG	QGNG_3	0.410026	0.0216097	0.0147834	0.052622	3.64886e-06	6.9341e-05	0.0361441	2.9711e-06	8.22015e-05	9.61678	22/03/2018	6Hz	33 μm	~3 J/cm2	Line	1.6 µm/s	7800
QGNG	QGNG_1	0.425784	0.0223866	0.0153373	0.0525792	4.04348e-06	7.69026e-05	0.0360885	3.12687e-06	8.66444e-05	8.62562	22/03/2018	6Hz	33 μm	~3 J/cm2	Line	1.6 µm/s	7800
QGNG	QGNG_4	0.510713	0.0269425	0.0184852	0.0527069	3.52751e-06	6.69268e-05	0.0362649	2.85369e-06	7.86901e-05	11.9435	22/03/2018	6Hz	33 μm	~3 J/cm2	Line	1.6 µm/s	7800
QGNG	QGNG_2	0.531585	0.0280542	0.0192751	0.0526984	2.85335e-06	5.41449e-05	0.0362566	2.62428e-06	7.23809e-05	11.4164	22/03/2018	6Hz	33 μm	~3 J/cm2	Line	1.6 µm/s	7800
R33	R33_6	0.375977	0.0198323	0.0135484	0.0526273	2.80697e-06	5.33368e-05	0.0361515	3.05647e-06	8.45462e-05	9.49753	22/03/2018	6Hz	33 μm	~3 J/cm2	Line	1.6 µm/s	7800
R33	R33_8	0.386762	0.0203843	0.0139263	0.0526099	3.58506e-06	6.81443e-05	0.0361207	3.30862e-06	9.15991e-05	9.57862	22/03/2018	6Hz	33 μm	~3 J/cm2	Line	1.6 µm/s	7800
R33	R33_7	0.398635	0.0210135	0.0143524	0.0526226	4.15962e-06	7.90462e-05	0.0361453	3.53847e-06	9.78958e-05	9.82863	22/03/2018	6Hz	33 μm	~3 J/cm2	Line	1.6 µm/s	7800
R33	R33_5	0.412644	0.0217731	0.0148965	0.0526489	2.98948e-06	5.67814e-05	0.036184	2.67937e-06	7.40484e-05	10.2122	22/03/2018	6Hz	33 μm	~3 J/cm2	Line	1.6 µm/s	7800
R33	R33_3	0.457839	0.02412	0.0165294	0.0526514	3.48893e-06	6.62647e-05	0.0361771	3.11746e-06	8.6172e-05	10.2219	22/03/2018	6Hz	33 μm	~3 J/cm2	Line	1.6 µm/s	7800
R33	R33_1	0.472347	0.0248581	0.0170395	0.0526107	3.97758e-06	7.56039e-05	0.0361232	3.15807e-06	8.74249e-05	8.64853	22/03/2018	6Hz	33 μm	~3 J/cm2	Line	1.6 µm/s	7800
R33	R33_4	0.513929	0.0271192	0.018611	0.0527092	3.1788e-06	6.03083e-05	0.0362659	2.29792e-06	6.33631e-05	12.2185	22/03/2018	6Hz	33 μm	~3 J/cm2	Line	1.6 µm/s	7800
R33	R33_2	0.533559	0.0281294	0.0193092	0.0526993	3.37561e-06	6.40542e-05	0.0362539	2.59927e-06	7.16962e-05	11.3206	22/03/2018	6Hz	33 μm	~3 J/cm2	Line	1.6 µm/s	7800
91500	Seq_91500_1	0.771926	0.0408475	0.0283315	0.0529211	2.22302e-06	4.20063e-05	0.0365817	2.06095e-06	5.63383e-05	10.787	26/03/18	6Hz	33 μm	~3 J/cm2	Line	1.6 µm/s	7800
91500	Seq_91500-MudTank_1	0.752603	0.039801	0.02761	0.052923	2.43751e-06	4.60576e-05	0.0365806	1.90777e-06	5.21524e-05	10.6088	26/03/18	6Hz	33 μm	~3 J/cm2	Line	1.6 µm/s	7800
91500	Seq_91500-AS3-1	0.744088	0.0393513	0.0272976	0.0529172	2.53131e-06	4.78353e-05	0.0365782	2.34514e-06	6.4113e-05	10.5165	26/03/18	6Hz	33 μm	~3 J/cm2	Line	1.6 µm/s	7800
91500	Seq_91500-Pleso-1	0.741382	0.0391844	0.0271548	0.0529159	2.74511e-06	5.18768e-05	0.0365756	2.33583e-06	6.38631e-05	10.4072	26/03/18	6Hz	33 μm	~3 J/cm2	Line	1.6 µm/s	7800
91500	Seq_91500-Peixe-1	0.733248	0.038768	0.0268747	0.0529131	2.7395e-06	5.17736e-05	0.0365655	2.39436e-06	6.54814e-05	10.399	26/03/18	6Hz	33 μm	~3 J/cm2	Line	1.6 µm/s	7800
91500	Seq_91500-MUN2-1	0.719638	0.0380479	0.026401	0.0529108	3.13343e-06	5.9221e-05	0.0365617	2.55062e-06	6.9762e-05	10.1404	26/03/18	6Hz	33 μm	~3 J/cm2	Line	1.6 µm/s	7800
91500	Seq_91500_1end	0.718628	0.0379891	0.0263076	0.0529078	2.33811e-06	4.41922e-05	0.0365562	2.61311e-06	7.14819e-05	9.93412	26/03/18	6Hz	33 μm	~3 J/cm2	Line	1.6 µm/s	7800
91500	Seq_91500_2	0.804154	0.0425445	0.0295638	0.0529385	2.78044e-06	5.2522e-05	0.0366094	1.8775e-06	5.12848e-05	10.5902	26/03/18	6Hz	33 μm	~3 J/cm2	Line	1.6 µm/s	7800
91500	Seq_91500-MudTank_2	0.800025	0.0423117	0.0293989	0.0529346	2.71478e-06	5.12856e-05	0.0366008	2.26669e-06	6.193e-05	10.4923	26/03/18	6Hz	33 μm	~3 J/cm2	Line	1.6 µm/s	7800
91500	Seq_91500-Pleso-2	0.708022	0.0374376	0.0259714	0.0529243	2.32138e-06	4.38622e-05	0.0365826	2.83812e-06	7.75813e-05	10.154	26/03/18	6Hz	33 μm	~3 J/cm2	Line	1.6 µm/s	7800
91500	Seq_91500-Peixe-2	0.685015	0.0362573	0.0251185	0.0529209	2.61621e-06	4.94363e-05	0.036577	1.98119e-06	5.41648e-05	10.3149	26/03/18	6Hz	33 μm	~3 J/cm2	Line	1.6 µm/s	7800
91500	Seq_91500-MUN2-2	0.675779	0.0357352	0.0247837	0.0529145	2.69339e-06	5.09007e-05	0.0365717	2.58768e-06	7.07564e-05	10.3106	26/03/18	6Hz	33 μm	~3 J/cm2	Line	1.6 µm/s	7800
91500	Seq_91500_2end	0.672467	0.0355648	0.0246498	0.052912	3.24268e-06	6.12844e-05	0.0365655	2.14499e-06	5.86617e-05	10.1354	26/03/18	6Hz	33 μm	~3 J/cm2	Line	1.6 µm/s	7800
91500	Seq_91500_3	0.664793	0.0351568	0.0243706	0.0529115	2.33538e-06	4.41375e-05	0.0365614	2.48389e-06	6.79374e-05	9.98604	26/03/18	6Hz	33 μm	~3 J/cm2	Line	1.6 µm/s	7800
91500	Seq_91500-MudTank_3	0.651857	0.0344961	0.0238708	0.0529124	3.06985e-06	5.80175e-05	0.0365583	2.27332e-06	6.21833e-05	9.74475	26/03/18	6Hz	33 μm	~3 J/cm2	Line	1.6 µm/s	7800
91500	Seq_91500-AS3-3	0.64552	0.0341285	0.0236544	0.0529056	2.90545e-06	5.49176e-05	0.0365526	2.69795e-06	7.38101e-05	9.4081	26/03/18	6Hz	33 μm	~3 J/cm2	Line	1.6 µm/s	7800
91500	Seq_91500-Pleso-3	0.642896	0.0339797	0.023549	0.0529054	2.68915e-06	5.08294e-05	0.0365502	2.54351e-06	6.95894e-05	9.45594	26/03/18	6Hz	33 μm	~3 J/cm2	Line	1.6 µm/s	7800
91500	Seq_91500-Peixe-3	0.635698	0.0336133	0.0232597	0.0529004	2.36769e-06	4.47575e-05	0.0365413	2.81268e-06	7.69725e-05	9.39902	26/03/18	6Hz	33 μm	~3 J/cm2	Line	1.6 µm/s	7800
91500	Seq_91500-MUN2-3	0.634549	0.033556	0.0232284	0.052896	2.81418e-06	5.32021e-05	0.0365355	2.59093e-06	7.09155e-05	9.3652	26/03/18	6Hz	33 μm	~3 J/cm2	Line	1.6 µm/s	7800
91500	Seq_91500_3end	0.633014	0.0334672	0.0231499	0.0528923	3.22139e-06	6.09046e-05	0.0365296	2.35169e-06	6.43777e-05	9.48883	26/03/18	6Hz	33 μm	~3 J/cm2	Line	1.6 µm/s	7800
91500	Seq_91500_4	0.631172	0.0333807	0.0230813	0.0528879	2.80452e-06	5.30277e-05	0.0365276	2.25699e-06	6.17885e-05	9.46261	26/03/18	6Hz	33 μm	~3 J/cm2	Line	1.6 µm/s	7800
91500	Seq_91500-MudTank_4	0.629755	0.0332968	0.0230243	0.0528898	2.84999e-06	5.38855e-05	0.0365266	2.41853e-06	6.62128e-05	9.46429	26/03/18	6Hz	33 μm	~3 J/cm2	Line	1.6 µm/s	7800
91500	Seq_91500-AS3-4	0.628775	0.0332279	0.0229926	0.0528859	2.66106e-06	5.03171e-05	0.0365242	1.98091e-06	5.42356e-05	9.26456	26/03/18	6Hz	33 μm	~3 J/cm2	Line	1.6 µm/s	7800
91500	Seq_91500-Pleso-4	0.618062	0.0326652	0.0225772	0.0528868	2.73046e-06	5.16284e-05	0.0365207	2.69617e-06	7.38258e-05	9.19527	26/03/18	6Hz	33 μm	~3 J/cm2	Line	1.6 µm/s	7800
91500	Seq_91500-Peixe-4	0.607259	0.0321201	0.0221897	0.0528789	3.1835e-06	6.02036e-05	0.0365122	2.29184e-06	6.27692e-05	9.21526	26/03/18	6Hz	33 μm	~3 J/cm2	Line	1.6 µm/s	7800
91500	Seq_91500-MUN2-4	0.570133	0.0301524	0.020835	0.0528647	2.39725e-06	4.53469e-05	0.0364968	2.70553e-06	7.41307e-05	8.78293	26/03/18	6Hz	33 μm	~3 J/cm2	Line	1.6 µm/s	7800
91500	Seq_91500_4end	0.540187	0.0285356	0.0197138	0.0528569	3.0846e-06	5.83576e-05	0.0364873	2.20237e-06	6.03599e-05	8.36389	26/03/18	6Hz	33 μm	~3 J/cm2	Line	1.6 µm/s	7800
91500	Seq_91500_5	0.714638	0.0378274	0.0263287	0.0529221	2.75133e-06	5.19884e-05	0.0365845	2.35344e-06	6.4329e-05	10.8857	26/03/18	6Hz	33 μm	~3 J/cm2	Line	1.6 µm/s	7800
91500	Seq_91500-MudTank_5	0.694907	0.0367424	0.0255593	0.0529149	2.24338e-06	4.2396e-05	0.0365779	2.03275e-06	5.55733e-05	10.7092	26/03/18	6Hz	33 μm	~3 J/cm2	Line	1.6 µm/s	7800
91500	Seq_91500-AS3-5	0.69209	0.0365972	0.0254766	0.0529149	2.61732e-06	4.94628e-05	0.036574	2.19064e-06	5.98961e-05	10.9132	26/03/18	6Hz	33 μm	~3 J/cm2	Line	1.6 µm/s	7800
91500	Seq_91500-Pleso-5	0.692531	0.0366682	0.0254517	0.0529138	3.10159e-06	5.8616e-05	0.0365753	2.59116e-06	7.08444e-05	10.8487	26/03/18	6Hz	33 μm	~3 J/cm2	Line	1.6 µm/s	7800
91500	Seq_91500-Peixe-5	0.692012	0.0365927	0.0254425	0.0529102	2.50528e-06	4.73496e-05	0.0365684	2.01114e-06	5.49966e-05	11.0247	26/03/18	6Hz	33 μm	~3 J/cm2	Line	1.6 µm/s	7800
91500	Seq_91500-MUN2-5	0.693092	0.0366585	0.0254831	0.0529101	2.56969e-06	4.85671e-05	0.0365706	2.23769e-06	6.11884e-05	11.072	26/03/18	6Hz	33 μm	~3 J/cm2	Line	1.6 µm/s	7800
91500	Seq_91500_5end	0.694071	0.0366906	0.0254998	0.0529067	2.33051e-06	4.40494e-05	0.0365633	1.93852e-06	5.30183e-05	11.3698	26/03/18	6Hz	33 μm	~3 J/cm2	Line	1.6 µm/s	7800
91500	Seq_Ech-1	0.755816	0.0399931	0.0279072	0.0529325	2.56223e-06	4.84057e-05	0.0366099	1.95536e-06	5.34107e-05	11.5247	26/03/18	6Hz	33 μm	~3 J/cm2	Line	1.6 µm/s	7800
91500	Seq_Ech-4	0.734303	0.0388696	0.0270965	0.0529291	2.5079e-06	4.73823e-05	0.0366017	2.0562e-06	5.61776e-05	11.7004	26/03/18	6Hz	33 μm	~3 J/cm2	Line	1.6 µm/s	7800
91500	Seq_Ech-7	0.735393	0.038915	0.0270913	0.0529268	2.12115e-06	4.0077e-05	0.0365943	2.27867e-06	6.22686e-05	11.9263	26/03/18	6Hz	33 μm	~3 J/cm2	Line	1.6 µm/s	7800
91500	Seq_Ech-10	0.738461	0.0390771	0.0271922	0.0529247	2.67889e-06	5.0617e-05	0.0365935	1.40195e-06	3.83114e-05	11.6254	26/03/18	6Hz	33 μm	~3 J/cm2	Line	1.6 µm/s	7800
91500	Seq_Ech-13	0.740656	0.0391661	0.0272425	0.0529233	2.53266e-06	4.78553e-05	0.0365877	2.59263e-06	7.08606e-05	11.8356	26/03/18	6Hz	33 μm	~3 J/cm2	Line	1.6 µm/s	7800
91500	Seq_Ech-16	0.719989	0.0380596	0.0264611	0.0529139	2.2354e-06	4.22461e-05	0.0365757	2.66519e-06	7.2868e-05	11.5897	26/03/18	6Hz	33 μm	~3 J/cm2	Line	1.6 µm/s	7800
91500	Seq_Ech-19	0.686464	0.0363029	0.0252058	0.052909	1.95867e-06	3.70196e-05	0.0365634	1.84356e-06	5.04207e-05	11.5267	26/03/18	6Hz	33 μm	~3 J/cm2	Line	1.6 µm/s	7800
91500	Seq_Ech-22	0.67146	0.035494	0.0246499	0.0528999	2.38386e-06	4.50636e-05	0.0365546	1.97188e-06	5.39434e-05	11.4903	26/03/18	6Hz	33 μm	~3 J/cm2	Line	1.6 µm/s	7800
91500	Seq_Ech-25	0.659964	0.0348793	0.0242226	0.0528972	2.42619e-06	4.58661e-05	0.0365446	2.24777e-06	6.15075e-05	11.2819	26/03/18	6Hz	33 μm	~3 J/cm2	Line	1.6 µm/s	7800
91500	Seq_Ech-28	0.638066	0.0337403	0.0233933	0.0528869	2.79127e-06	5.27781e-05	0.0365342	2.13663e-06	5.84831e-05	10.7404	26/03/18	6Hz	33 μm	~3 J/cm2	Line	1.6 µm/s	7800
AS3	Seq_AS3-1	0.74447	0.0393865	0.0272934	0.0529158	2.68416e-06	5.07252e-05	0.0365705	2.45331e-06	6.70845e-05	11.3591	26/03/18	6Hz	33 μm	~3 J/cm2	Line	1.6 µm/s	7800
AS3	Seq_AS3-2	0.72234	0.0382071	0.026538	0.0529238	2.76451e-06	5.22357e-05	0.0365824	1.84058e-06	5.03133e-05	11.7199	26/03/18	6Hz	33 μm	~3 J/cm2	Line	1.6 µm/s	7800
AS3	Seq_AS3-2	0.72234	0.0382071	0.026538	0.0529238	2.76451e-06	5.22357e-05	0.0365824	1.84058e-06	5.03133e-05	11.7199	26/03/18	6Hz	33 μm	~3 J/cm2	Line	1.6 µm/s	7800
AS3	Seq_AS3-3	0.64596	0.0341594	0.023673	0.0529004	2.26836e-06	4.28798e-05	0.0365446	2.44155e-06	6.681e-05	10.8752	26/03/18	6Hz	33 μm	~3 J/cm2	Line	1.6 µm/s	7800
AS3	Seq_AS3-4	0.626337	0.0331025	0.0228947	0.0528849	2.32752e-06	4.4011e-05	0.0365202	2.33649e-06	6.39779e-05	10.5591	26/03/18	6Hz	33 μm	~3 J/cm2	Line	1.6 µm/s	7800
AS3	Seq_AS3-5	0.696796	0.0368565	0.025617	0.0529123	2.65642e-06	5.02042e-05	0.0365674	1.7662e-06	4.82997e-05	12.4615	26/03/18	6Hz	33 μm	~3 J/cm2	Line	1.6 µm/s	7800
MudTank	Seq_MudTank-1	0.746893	0.0394969	0.0274064	0.0529185	2.82129e-06	5.3314e-05	0.0365725	2.66529e-06	7.28768e-05	10.0564	26/03/18	6Hz	33 μm	~3 J/cm2	Line	1.6 µm/s	7800
MudTank	Seq_MudTank-2	0.76952	0.0407062	0.0282776	0.0529313	2.01638e-06	3.80943e-05	0.0365939	2.16815e-06	5.92489e-05	10.1877	26/03/18	6Hz	33 μm	~3 J/cm2	Line	1.6 µm/s	7800
MudTank	Seq_MudTank-3	0.647228	0.03421	0.0236905	0.052906	2.37244e-06	4.48427e-05	0.0365534	2.36249e-06	6.46313e-05	9.18759	26/03/18	6Hz	33 μm	~3 J/cm2	Line	1.6 µm/s	7800
MudTank	Seq_MudTank-4	0.632415	0.033428	0.0231608	0.0528891	2.90725e-06	5.49689e-05	0.0365246	2.48346e-06	6.79942e-05	8.73387	26/03/18	6Hz	33 μm	~3 J/cm2	Line	1.6 µm/s	7800
MudTank	Seq_MudTank-5	0.692998	0.0366732	0.0254876	0.0529193	2.99336e-06	5.65647e-05	0.0365798	1.96548e-06	5.37313e-05	11.0774	26/03/18	6Hz	33 μm	~3 J/cm2	Line	1.6 µm/s	7800
MUN-2	Seq_MUN2-1	0.720465	0.0380818	0.0263944	0.052875	2.9436e-06	5.56708e-05	0.0365171	2.26406e-06	6.19999e-05	9.23073	26/03/18	6Hz	33 μm	~3 J/cm2	Line	1.6 µm/s	7800
MUN-2	Seq_MUN2-2	0.675753	0.0357565	0.0247768	0.0528839	2.4581e-06	4.64811e-05	0.0365237	2.55023e-06	6.9824e-05	8.98034	26/03/18	6Hz	33 μm	~3 J/cm2	Line	1.6 µm/s	7800
MUN-2	Seq_MUN2-3	0.631212	0.0333805	0.0231039	0.0528615	2.67103e-06	5.05288e-05	0.0364897	2.66592e-06	7.30597e-05	8.28532	26/03/18	6Hz	33 μm	~3 J/cm2	Line	1.6 µm/s	7800
MUN-2	Seq_MUN2-4	0.552443	0.0292012	0.0201739	0.0528288	2.71064e-06	5.13099e-05	0.0364429	2.19709e-06	6.02885e-05	7.50594	26/03/18	6Hz	33 μm	~3 J/cm2	Line	1.6 µm/s	7800
MUN-2	Seq_MUN2-5	0.6958	0.0367883	0.0256052	0.0528761	2.31887e-06	4.38548e-05	0.0365195	2.57721e-06	7.05709e-05	10.6905	26/03/18	6Hz	33 μm	~3 J/cm2	Line	1.6 µm/s	7800
MUN-2_1	Seq_Ech-9	0.738321	0.0390482	0.0271855	0.052895	3.10037e-06	5.86137e-05	0.0365492	2.18883e-06	5.98873e-05	11.0755	26/03/18	6Hz	33 μm	~3 J/cm2	Line	1.6 µm/s	7800
MUN-2_2	Seq_Ech-18	0.698984	0.0369609	0.0256745	0.0528759	2.97718e-06	5.6305e-05	0.036526	2.51042e-06	6.87297e-05	10.4912	26/03/18	6Hz	33 μm	~3 J/cm2	Line	1.6 µm/s	7800
MUN-2_3	Seq_Ech-27	0.649962	0.0343742	0.0238278	0.0528584	2.62967e-06	4.97494e-05	0.0364916	2.04937e-06	5.616e-05	10.0714	26/03/18	6Hz	33 μm	~3 J/cm2	Line	1.6 µm/s	7800
MUN-3	Seq_MUN3-1	0.760568	0.0402405	0.0279102	0.0528867	2.47671e-06	4.68305e-05	0.0365311	2.11215e-06	5.78179e-05	10.3856	26/03/18	6Hz	33 μm	~3 J/cm2	Line	1.6 µm/s	7800
MUN-3	Seq_MUN3-2	0.779419	0.0412364	0.0286862	0.0529067	2.39736e-06	4.5313e-05	0.0365596	2.25509e-06	6.16826e-05	10.7865	26/03/18	6Hz	33 μm	~3 J/cm2	Line	1.6 µm/s	7800
MUN-3	Seq_MUN3-3	0.660745	0.0349448	0.0242351	0.0528764	2.69289e-06	5.09281e-05	0.0365113	2.36718e-06	6.48343e-05	9.81762	26/03/18	6Hz	33 μm	~3 J/cm2	Line	1.6 µm/s	7800
MUN-3	Seq_MUN3-4	0.628305	0.0332012	0.0229972	0.052854	3.09025e-06	5.84677e-05	0.036482	2.45573e-06	6.73135e-05	9.35651	26/03/18	6Hz	33 μm	~3 J/cm2	Line	1.6 µm/s	7800
MUN-3	Seq_MUN3-5	0.703425	0.0372042	0.0258839	0.0528825	2.66495e-06	5.03937e-05	0.036532	2.33711e-06	6.39742e-05	11.4741	26/03/18	6Hz	33 μm	~3 J/cm2	Line	1.6 µm/s	7800
Peixe	Seq_Peixe-1	0.727218	0.0384555	0.026669	0.0529095	2.50438e-06	4.73333e-05	0.0365581	1.98576e-06	5.4318e-05	10.782	26/03/18	6Hz	33 μm	~3 J/cm2	Line	1.6 µm/s	7800
Peixe	Seq_Peixe-2	0.683507	0.0361388	0.0250801	0.0529151	2.2994e-06	4.34545e-05	0.0365674	2.21277e-06	6.0512e-05	10.7554	26/03/18	6Hz	33 μm	~3 J/cm2	Line	1.6 µm/s	7800
Peixe	Seq_Peixe-3	0.634779	0.0335662	0.023208	0.0528915	2.97201e-06	5.61907e-05	0.0365296	2.3972e-06	6.56236e-05	10.0564	26/03/18	6Hz	33 μm	~3 J/cm2	Line	1.6 µm/s	7800
Peixe	Seq_Peixe-4	0.634779	0.0335662	0.023208	0.0528915	2.97201e-06	5.61907e-05	0.0365296	2.3972e-06	6.56236e-05	10.0564	26/03/18	6Hz	33 μm	~3 J/cm2	Line	1.6 µm/s	7800
Peixe	Seq_Peixe-5	0.69333	0.0366692	0.0255109	0.0529005	2.83519e-06	5.35947e-05	0.0365574	2.23647e-06	6.1177e-05	11.2166	26/03/18	6Hz	33 μm	~3 J/cm2	Line	1.6 µm/s	7800
Plesovice	Seq_Pleso-1	0.739978	0.0391554	0.0271444	0.052915	2.361e-06	4.46188e-05	0.0365687	2.07921e-06	5.68575e-05	11.0672	26/03/18	6Hz	33 μm	~3 J/cm2	Line	1.6 µm/s	7800
Plesovice	Seq_Pleso-2	0.698557	0.0369535	0.0256329	0.0529197	2.18147e-06	4.12222e-05	0.036574	1.97925e-06	5.41163e-05	11.1417	26/03/18	6Hz	33 μm	~3 J/cm2	Line	1.6 µm/s	7800
Plesovice	Seq_Pleso-3	0.640639	0.0338492	0.0234594	0.0529011	2.36316e-06	4.46712e-05	0.0365465	2.4381e-06	6.67123e-05	10.347	26/03/18	6Hz	33 μm	~3 J/cm2	Line	1.6 µm/s	7800
Plesovice	Seq_Pleso-4	0.616721	0.0326128	0.0225638	0.0528841	2.68639e-06	5.07977e-05	0.0365167	2.35477e-06	6.44849e-05	9.85083	26/03/18	6Hz	33 μm	~3 J/cm2	Line	1.6 µm/s	7800
Plesovice	Seq_Pleso-5	0.693532	0.0366732	0.0255036	0.0529084	2.28513e-06	4.31904e-05	0.0365636	2.82316e-06	7.72123e-05	11.8801	26/03/18	6Hz	33 μm	~3 J/cm2	Line	1.6 µm/s	7800
91500	Seq-verif-1	0.752615	0.0398506	0.0276498	0.0529123	2.3336e-06	4.41032e-05	0.0365694	2.96981e-06	8.12102e-05	9.44017	27/07/18	6Hz	33 μm	~3 J/cm2	Line	1.6 µm/s	7800
91500	Seq-verif-3	0.727195	0.038483	0.0267407	0.0529077	2.80185e-06	5.29572e-05	0.0365597	2.50525e-06	6.85249e-05	9.2553	27/07/18	6Hz	33 μm	~3 J/cm2	Line	1.6 µm/s	7800
91500	Seq-verif-5	0.717171	0.0379572	0.0263521	0.0529072	2.71108e-06	5.12423e-05	0.0365583	2.0915e-06	5.72099e-05	8.98663	27/07/18	6Hz	33 μm	~3 J/cm2	Line	1.6 µm/s	7800
91500	Seq-verif-7	0.715243	0.0378469	0.0262522	0.0529036	2.57499e-06	4.86732e-05	0.0365516	2.36482e-06	6.46981e-05	9.86045	27/07/18	6Hz	33 μm	~3 J/cm2	Line	1.6 µm/s	7800
91500	Seq-std-91500-1	0.797512	0.0422151	0.0292838	0.0529178	3.27106e-06	6.18141e-05	0.0365714	3.03997e-06	8.31242e-05	8.48184	27/07/18	6Hz	33 μm	~3 J/cm2	Line	1.6 µm/s	7800
91500	Seq-std-91500-2	0.715175	0.0378506	0.0262133	0.0529022	2.80528e-06	5.30278e-05	0.0365426	2.9296e-06	8.01694e-05	8.22275	27/07/18	6Hz	33 μm	~3 J/cm2	Line	1.6 µm/s	7800
91500	Seq-std-91500-3	0.657715	0.0347938	0.0240965	0.0528983	3.09913e-06	5.85867e-05	0.0365385	2.7481e-06	7.52112e-05	7.56796	27/07/18	6Hz	33 μm	~3 J/cm2	Line	1.6 µm/s	7800
91500	Seq-Z1	0.728132	0.0385362	0.0268428	0.0528929	2.38046e-06	4.50052e-05	0.0365469	2.31104e-06	6.3235e-05	11.7537	27/07/18	6Hz	33 μm	~3 J/cm2	Line	1.6 µm/s	7800
91500	Seq-Z4	0.709852	0.0375738	0.0261738	0.0528863	2.6718e-06	5.05196e-05	0.0365405	1.9189e-06	5.25144e-05	11.9481	27/07/18	6Hz	33 μm	~3 J/cm2	Line	1.6 µm/s	7800
91500	Seq-Z7	0.699371	0.0370024	0.0257634	0.0528862	2.32553e-06	4.39724e-05	0.0365327	1.98388e-06	5.43042e-05	12.0311	27/07/18	6Hz	33 μm	~3 J/cm2	Line	1.6 µm/s	7800
91500	Seq-Z10	0.700777	0.0370756	0.02584	0.0528824	2.28642e-06	4.3236e-05	0.0365277	1.52359e-06	4.17107e-05	12.0146	27/07/18	6Hz	33 μm	~3 J/cm2	Line	1.6 µm/s	7800
91500	Seq-Z13	0.690883	0.036557	0.0254121	0.0528792	2.46011e-06	4.65233e-05	0.0365223	2.17844e-06	5.9647e-05	11.8397	27/07/18	6Hz	33 μm	~3 J/cm2	Line	1.6 µm/s	7800
91500	Seq-Z16	0.677383	0.0358339	0.0249111	0.0528741	2.38664e-06	4.51381e-05	0.0365183	1.88141e-06	5.15196e-05	11.2317	27/07/18	6Hz	33 μm	~3 J/cm2	Line	1.6 µm/s	7800
91500	Seq-Z19	0.682165	0.0360694	0.0250742	0.0528692	2.09992e-06	3.97192e-05	0.0365106	2.28599e-06	6.26117e-05	11.0266	27/07/18	6Hz	33 μm	~3 J/cm2	Line	1.6 µm/s	7800
91500	Seq-Z22	0.657746	0.0347849	0.0241637	0.0528665	2.67321e-06	5.05652e-05	0.0365022	2.49427e-06	6.83321e-05	10.645	27/07/18	6Hz	33 μm	~3 J/cm2	Line	1.6 µm/s	7800
91500	Seq-Z25	0.641399	0.0339054	0.02357	0.0528591	2.20143e-06	4.16471e-05	0.0364972	2.31627e-06	6.34644e-05	10.6819	27/07/18	6Hz	33 μm	~3 J/cm2	Line	1.6 µm/s	7800
91500	Seq-Z28	0.631455	0.0333914	0.0231833	0.0528572	2.79992e-06	5.29714e-05	0.0364954	2.09403e-06	5.7378e-05	10.6346	27/07/18	6Hz	33 μm	~3 J/cm2	Line	1.6 µm/s	7800
91500	Seq-Z31	0.637806	0.0337397	0.0234234	0.0528579	2.56704e-06	4.85649e-05	0.0364928	1.94946e-06	5.34205e-05	10.9489	27/07/18	6Hz	33 μm	~3 J/cm2	Line	1.6 µm/s	7800
91500	Seq_Z2-1	0.680853	0.0360394	0.0250244	0.0528983	2.66146e-06	5.03128e-05	0.0365452	2.27076e-06	6.21357e-05	10.2086	27/07/18	6Hz	33 μm	~3 J/cm2	Line	1.6 µm/s	7800
91500	Seq_Z2-4	0.620343	0.0328088	0.0227587	0.0528743	2.94472e-06	5.56928e-05	0.0365113	2.54521e-06	6.97102e-05	9.5446	27/07/18	6Hz	33 μm	~3 J/cm2	Line	1.6 µm/s	7800
91500	Seq_Z2-7	0.592097	0.0312989	0.0216772	0.0528666	2.24871e-06	4.25356e-05	0.0364993	2.39562e-06	6.56347e-05	9.19501	27/07/18	6Hz	33 μm	~3 J/cm2	Line	1.6 µm/s	7800
91500	Seq_Z2-10	0.557307	0.0294602	0.0203912	0.0528536	2.98921e-06	5.65565e-05	0.0364808	2.54261e-06	6.96972e-05	8.64601	27/07/18	6Hz	33 μm	~3 J/cm2	Line	1.6 µm/s	7800
91500	Seq_Z2-13	0.538539	0.0284793	0.0196874	0.0528522	2.5946e-06	4.90917e-05	0.0364702	2.6328e-06	7.21903e-05	8.66905	27/07/18	6Hz	33 μm	~3 J/cm2	Line	1.6 µm/s	7800
91500	Seq_Z2-14	0.80407	0.0425292	0.0295324	0.0528971	2.53866e-06	4.79925e-05	0.0365498	2.29375e-06	6.27568e-05	10.621	27/07/18	6Hz	33 μm	~3 J/cm2	Line	1.6 µm/s	7800
91500	Seq_Z2-17	0.685487	0.0362496	0.0251425	0.0528817	2.35016e-06	4.4442e-05	0.0365219	2.21747e-06	6.07162e-05	10.1006	27/07/18	6Hz	33 μm	~3 J/cm2	Line	1.6 µm/s	7800
91500	Seq_Z2-20	0.639195	0.0337963	0.0234257	0.0528655	2.29546e-06	4.34209e-05	0.0364985	2.85296e-06	7.81665e-05	9.62765	27/07/18	6Hz	33 μm	~3 J/cm2	Line	1.6 µm/s	7800
91500	Seq_Z2-23	0.628612	0.0332244	0.023016	0.0528545	3.02292e-06	5.71932e-05	0.0364861	2.74968e-06	7.53623e-05	9.49812	27/07/18	6Hz	33 μm	~3 J/cm2	Line	1.6 µm/s	7800
91500	Seq_Z2-26	0.584183	0.0308805	0.0213597	0.0528412	2.53294e-06	4.79349e-05	0.0364655	2.36046e-06	6.47314e-05	9.12045	27/07/18	6Hz	33 μm	~3 J/cm2	Line	1.6 µm/s	7800
91500	Seq_Z2-29	0.541208	0.0286058	0.0197761	0.0528283	2.76735e-06	5.23839e-05	0.0364424	2.59567e-06	7.12266e-05	8.60684	27/07/18	6Hz	33 μm	~3 J/cm2	Line	1.6 µm/s	7800
91500	Seq_Z2-29b	0.754313	0.0398945	0.0279174	0.0529089	2.29657e-06	4.34062e-05	0.0365757	2.01359e-06	5.50527e-05	11.8629	27/07/18	6Hz	33 μm	~3 J/cm2	Line	1.6 µm/s	7800
91500	Seq_Z2-32	0.74402	0.0393664	0.0275044	0.0529027	2.60638e-06	4.92674e-05	0.0365653	1.60978e-06	4.40247e-05	11.7577	27/07/18	6Hz	33 μm	~3 J/cm2	Line	1.6 µm/s	7800
91500	Seq_Z2-35	0.726358	0.038463	0.026791	0.0528961	2.1699e-06	4.1022e-05	0.0365571	2.13913e-06	5.85146e-05	11.9034	27/07/18	6Hz	33 μm	~3 J/cm2	Line	1.6 µm/s	7800
91500	Seq_Z2-38	0.715934	0.0378922	0.0264236	0.0528957	2.94843e-06	5.57405e-05	0.0365515	2.24326e-06	6.13725e-05	11.6925	27/07/18	6Hz	33 μm	~3 J/cm2	Line	1.6 µm/s	7800
91500	Seq_ech-1	0.707773	0.0374446	0.025944	0.052894	2.67379e-06	5.05499e-05	0.036538	2.10155e-06	5.75169e-05	8.56732	27/07/18	6Hz	33 μm	~3 J/cm2	Line	1.6 µm/s	7800
91500	Seq_ech-4	0.649239	0.0343451	0.0237871	0.0528841	2.22063e-06	4.19906e-05	0.0365191	2.81891e-06	7.71901e-05	8.59894	27/07/18	6Hz	33 μm	~3 J/cm2	Line	1.6 µm/s	7800
91500	Seq_ech-7	0.602346	0.0318346	0.0220304	0.0528741	3.02462e-06	5.72043e-05	0.0365009	2.44007e-06	6.68495e-05	8.00233	27/07/18	6Hz	33 μm	~3 J/cm2	Line	1.6 µm/s	7800
91500	Seq_ech-7b	0.732526	0.0387713	0.0269596	0.0529043	3.12299e-06	5.9031e-05	0.0365571	2.28005e-06	6.23695e-05	9.72188	27/07/18	6Hz	33 μm	~3 J/cm2	Line	1.6 µm/s	7800
91500	Seq_ech-10	0.687349	0.0363841	0.0252714	0.0528948	2.86229e-06	5.41129e-05	0.0365447	2.12489e-06	5.8145e-05	9.40253	27/07/18	6Hz	33 μm	~3 J/cm2	Line	1.6 µm/s	7800
91500	Seq_ech-13	0.662417	0.0350244	0.0243058	0.0528828	2.77752e-06	5.25221e-05	0.0365221	1.73338e-06	4.74612e-05	9.34104	27/07/18	6Hz	33 μm	~3 J/cm2	Line	1.6 µm/s	7800
91500	Seq_ech-16	0.658519	0.0348333	0.0241604	0.0528813	3.53164e-06	6.67843e-05	0.0365212	2.66386e-06	7.29401e-05	9.05397	27/07/18	6Hz	33 μm	~3 J/cm2	Line	1.6 µm/s	7800
91500	Seq_ech-19	0.680211	0.0359904	0.0249537	0.0528849	2.47439e-06	4.67883e-05	0.0365252	2.0384e-06	5.58081e-05	9.12931	27/07/18	6Hz	33 μm	~3 J/cm2	Line	1.6 µm/s	7800
91500	Seq_ech-22	0.67087	0.0354941	0.0245917	0.0528751	3.3171e-06	6.27347e-05	0.0365139	2.73235e-06	7.48304e-05	9.01187	27/07/18	6Hz	33 μm	~3 J/cm2	Line	1.6 µm/s	7800
91500	Seq_ech-25	0.641603	0.033911	0.0235082	0.0528699	2.75733e-06	5.21531e-05	0.0365038	2.57261e-06	7.04751e-05	8.43396	27/07/18	6Hz	33 μm	~3 J/cm2	Line	1.6 µm/s	7800
91500	Seq_ech-28	0.609047	0.0322001	0.0222785	0.0528588	2.37576e-06	4.49455e-05	0.0364904	2.52864e-06	6.9296e-05	8.33206	27/07/18	6Hz	33 μm	~3 J/cm2	Line	1.6 µm/s	7800
91500 (diff. cryst)	Seq-verif-2	0.740981	0.0392146	0.0272371	0.0529134	2.95743e-06	5.5892e-05	0.0365657	2.03077e-06	5.55375e-05	8.95805	27/07/18	6Hz	33 μm	~3 J/cm2	Line	1.6 µm/s	7800
91500 (diff. cryst)	Seq-verif-4	0.72364	0.0382999	0.0265965	0.0529081	2.56506e-06	4.84815e-05	0.0365547	2.59909e-06	7.11014e-05	9.87472	27/07/18	6Hz	33 μm	~3 J/cm2	Line	1.6 µm/s	7800
91500 (diff. cryst)	Seq-verif-6	0.715483	0.0378446	0.0262684	0.0529065	3.20442e-06	6.05675e-05	0.0365564	2.28956e-06	6.26308e-05	9.00602	27/07/18	6Hz	33 μm	~3 J/cm2	Line	1.6 µm/s	7800
MUN-1	Seq-std-MUN-1	0.754219	0.039915	0.0276668	0.0528793	3.75747e-06	7.10575e-05	0.0365212	2.52024e-06	6.90075e-05	8.07047	27/07/18	6Hz	33 μm	~3 J/cm2	Line	1.6 µm/s	7800
MUN-1	Seq-std-MUN-2	0.682978	0.036133	0.0250396	0.0528667	3.60958e-06	6.8277e-05	0.0364964	2.41448e-06	6.61568e-05	7.56623	27/07/18	6Hz	33 μm	~3 J/cm2	Line	1.6 µm/s	7800
MUN-2_1	Seq-Z12	0.700755	0.0370922	0.0258028	0.0528443	2.54876e-06	4.82316e-05	0.0364771	2.27523e-06	6.23742e-05	10.0278	27/07/18	6Hz	33 μm	~3 J/cm2	Line	1.6 µm/s	7800
MUN-2_1	Seq_Z2-12	0.557723	0.0294798	0.0203709	0.0528176	2.58359e-06	4.89153e-05	0.0364271	2.26577e-06	6.22003e-05	7.43551	27/07/18	6Hz	33 μm	~3 J/cm2	Line	1.6 µm/s	7800
MUN-2_1	Seq_ech-9	0.704572	0.0372874	0.025898	0.0528636	2.58001e-06	4.88051e-05	0.0365003	2.28891e-06	6.27092e-05	10.4107	27/07/18	6Hz	33 μm	~3 J/cm2	Line	1.6 µm/s	7800
MUN-2_2	Seq-Z30	0.642284	0.0339773	0.0235678	0.052821	2.26627e-06	4.29048e-05	0.0364437	2.76812e-06	7.5956e-05	10.7742	27/07/18	6Hz	33 μm	~3 J/cm2	Line	1.6 µm/s	7800
MUN-2_2	Seq_Z2-25	0.606001	0.0320503	0.022161	0.0528089	3.33034e-06	6.30639e-05	0.0364228	2.5645e-06	7.0409e-05	7.77114	27/07/18	6Hz	33 μm	~3 J/cm2	Line	1.6 µm/s	7800
MUN-2_2	Seq_ech-18	0.67392	0.0356402	0.0247228	0.0528477	2.90253e-06	5.49225e-05	0.0364822	2.55043e-06	6.9909e-05	10.0174	27/07/18	6Hz	33 μm	~3 J/cm2	Line	1.6 µm/s	7800
MUN-2_3	Seq_Z2-37	0.718841	0.0380452	0.0265319	0.0528639	3.57733e-06	6.76706e-05	0.0365101	2.5728e-06	7.04682e-05	10.0437	27/07/18	6Hz	33 μm	~3 J/cm2	Line	1.6 µm/s	7800
MUN-2_3	Seq_ech-27	0.624299	0.0330063	0.0228535	0.0528317	3.31592e-06	6.27638e-05	0.0364466	2.413e-06	6.62064e-05	9.2421	27/07/18	6Hz	33 μm	~3 J/cm2	Line	1.6 µm/s	7800
91500	Seq_std_1	0.444962	0.023467	0.0161756	0.0526437	2.49419e-06	4.73786e-05	0.0361854	2.1279e-06	5.88054e-05	7.70444	2019-01-21	6Hz	33 μm	~3 J/cm2	Line	1.6 µm/s	7800
91500	Seq_std_4	0.444502	0.0234423	0.016176	0.052638	2.89417e-06	5.49825e-05	0.0361843	2.5392e-06	7.0174e-05	7.75227	2019-01-21	6Hz	33 μm	~3 J/cm2	Line	1.6 µm/s	7800
91500	Seq_std_7	0.456994	0.0241223	0.0166403	0.0526427	3.33516e-06	6.33547e-05	0.0361886	2.20136e-06	6.08303e-05	7.74889	2019-01-21	6Hz	33 μm	~3 J/cm2	Line	1.6 µm/s	7800
91500	Seq_std_10	0.467189	0.0246401	0.0169808	0.0526408	2.79456e-06	5.30873e-05	0.0361871	2.47556e-06	6.84099e-05	7.72514	2019-01-21	6Hz	33 μm	~3 J/cm2	Line	1.6 µm/s	7800
91500	Seq_std_13	0.463049	0.0244423	0.0168395	0.0526408	3.09387e-06	5.87732e-05	0.0361883	2.38101e-06	6.5795e-05	7.52546	2019-01-21	6Hz	33 μm	~3 J/cm2	Line	1.6 µm/s	7800
91500	Seq_G_1 1	0.740946	0.0391247	0.0266855	0.0527694	2.92563e-06	5.54417e-05	0.03632	2.20453e-06	6.06974e-05	8.14312	2019-01-21	6Hz	33 μm	~3 J/cm2	Line	1.6 µm/s	7800
91500	Seq_G_1 4	0.706589	0.0372956	0.0253823	0.0527455	2.85138e-06	5.40592e-05	0.0362893	2.50154e-06	6.89333e-05	8.35606	2019-01-21	6Hz	33 μm	~3 J/cm2	Line	1.6 µm/s	7800
91500	Seq_G_1 7	0.688806	0.0363459	0.0248399	0.0527295	3.00949e-06	5.70741e-05	0.0362754	2.03772e-06	5.61737e-05	8.37681	2019-01-21	6Hz	33 μm	~3 J/cm2	Line	1.6 µm/s	7800
91500	Seq_G_1 10	0.662331	0.0349246	0.0239847	0.0527134	3.76674e-06	7.1457e-05	0.0362684	2.56355e-06	7.06827e-05	8.16265	2019-01-21	6Hz	33 μm	~3 J/cm2	Line	1.6 µm/s	7800
91500	Seq_G_1 13	0.644523	0.0339971	0.0234209	0.0527009	2.74481e-06	5.20829e-05	0.036264	2.69555e-06	7.43314e-05	8.02585	2019-01-21	6Hz	33 μm	~3 J/cm2	Line	1.6 µm/s	7800
91500	Seq_G_1 16	0.64248	0.0339059	0.0233839	0.052695	2.7378e-06	5.19557e-05	0.0362649	2.43519e-06	6.71499e-05	8.01373	2019-01-21	6Hz	33 μm	~3 J/cm2	Line	1.6 µm/s	7800
91500	Seq_G_1 19	0.624116	0.0329102	0.0227258	0.0526836	2.87002e-06	5.44766e-05	0.0362509	2.10065e-06	5.79476e-05	7.80878	2019-01-21	6Hz	33 μm	~3 J/cm2	Line	1.6 µm/s	7800
91500	Seq_G_1 22	0.591664	0.0311961	0.0215531	0.0526727	2.97968e-06	5.65698e-05	0.0362274	2.77836e-06	7.66922e-05	7.54046	2019-01-21	6Hz	33 μm	~3 J/cm2	Line	1.6 µm/s	7800
91500	Seq_G_1 25	0.5465	0.0288092	0.019891	0.0526521	3.85786e-06	7.32708e-05	0.0362038	2.53597e-06	7.0047e-05	7.14453	2019-01-21	6Hz	33 μm	~3 J/cm2	Line	1.6 µm/s	7800
91500	Seq_G_1 28	0.508658	0.0268071	0.0184914	0.0526415	3.6245e-06	6.88525e-05	0.0361853	2.93067e-06	8.09905e-05	6.79457	2019-01-21	6Hz	33 μm	~3 J/cm2	Line	1.6 µm/s	7800
91500	Seq_G_1 31	0.483427	0.0254843	0.0175634	0.0526241	3.25882e-06	6.19265e-05	0.0361665	3.20849e-06	8.87145e-05	6.44281	2019-01-21	6Hz	33 μm	~3 J/cm2	Line	1.6 µm/s	7800
91500	Seq_G_1 34	0.446372	0.0235233	0.0161881	0.0526135	3.23596e-06	6.15044e-05	0.0361481	2.87349e-06	7.94919e-05	5.99972	2019-01-21	6Hz	33 μm	~3 J/cm2	Line	1.6 µm/s	7800
91500	Seq_G_1 37	0.414415	0.0218291	0.0150286	0.052603	3.45555e-06	6.56912e-05	0.036131	3.24183e-06	8.97245e-05	5.73302	2019-01-21	6Hz	33 μm	~3 J/cm2	Line	1.6 µm/s	7800
91500	Seq_G_2 1	0.704618	0.0372061	0.025775	0.0527456	3.25613e-06	6.17327e-05	0.0363393	2.04574e-06	5.62957e-05	9.61624	2019-01-21	6Hz	33 μm	~3 J/cm2	Line	1.6 µm/s	7800
91500	Seq_G_2 4	0.672952	0.0354998	0.0246218	0.0527353	2.68869e-06	5.09846e-05	0.0363199	1.96667e-06	5.41485e-05	9.57948	2019-01-21	6Hz	33 μm	~3 J/cm2	Line	1.6 µm/s	7800
91500	Seq_G_2 7	0.627885	0.0331446	0.0229533	0.052721	2.75785e-06	5.23103e-05	0.0363014	2.39622e-06	6.60091e-05	9.35352	2019-01-21	6Hz	33 μm	~3 J/cm2	Line	1.6 µm/s	7800
91500	Seq_G_2 10	0.612186	0.0323183	0.0223723	0.0527119	2.81689e-06	5.34393e-05	0.0362823	2.61649e-06	7.21147e-05	9.06043	2019-01-21	6Hz	33 μm	~3 J/cm2	Line	1.6 µm/s	7800
91500	Seq_G_2 13	0.553075	0.0291803	0.0201536	0.0526858	2.17649e-06	4.13108e-05	0.0362572	2.34482e-06	6.46719e-05	8.60599	2019-01-21	6Hz	33 μm	~3 J/cm2	Line	1.6 µm/s	7800
91500	Seq_G_2 16	0.520737	0.0274617	0.0189641	0.0526787	2.87566e-06	5.45887e-05	0.0362369	2.44592e-06	6.7498e-05	8.34873	2019-01-21	6Hz	33 μm	~3 J/cm2	Line	1.6 µm/s	7800
91500	Seq_G_2 19	0.466468	0.024621	0.0169857	0.0526635	2.87199e-06	5.45347e-05	0.0362153	2.2429e-06	6.19322e-05	8.1092	2019-01-21	6Hz	33 μm	~3 J/cm2	Line	1.6 µm/s	7800
91500	Seq_G_2 22	0.5801	0.0306482	0.0211372	0.052727	2.13782e-06	4.05452e-05	0.0362983	1.99176e-06	5.4872e-05	9.72495	2019-01-21	6Hz	33 μm	~3 J/cm2	Line	1.6 µm/s	7800
91500	Seq_G_2 25	0.589703	0.0311433	0.0215394	0.0527262	2.45382e-06	4.6539e-05	0.036309	2.6671e-06	7.34557e-05	8.88001	2019-01-21	6Hz	33 μm	~3 J/cm2	Line	1.6 µm/s	7800
91500	Seq_G_2 28	0.589327	0.031126	0.0214806	0.0527157	2.8639e-06	5.43273e-05	0.0362917	2.00917e-06	5.53617e-05	9.11663	2019-01-21	6Hz	33 μm	~3 J/cm2	Line	1.6 µm/s	7800
91500	Seq_G_2 31	0.578408	0.0305458	0.0211186	0.0527118	2.02686e-06	3.84516e-05	0.0362832	2.19198e-06	6.0413e-05	9.18737	2019-01-21	6Hz	33 μm	~3 J/cm2	Line	1.6 µm/s	7800
91500	Seq_G_2 34	0.584605	0.0308645	0.0213256	0.0527114	2.61152e-06	4.95436e-05	0.036282	2.45221e-06	6.75875e-05	9.13889	2019-01-21	6Hz	33 μm	~3 J/cm2	Line	1.6 µm/s	7800
91500	Seq_G_2 37	0.581596	0.0307091	0.0212074	0.0527083	2.46787e-06	4.68213e-05	0.0362767	2.11685e-06	5.83528e-05	9.11961	2019-01-21	6Hz	33 μm	~3 J/cm2	Line	1.6 µm/s	7800
91500	Seq_G_2 40	0.568332	0.030012	0.0207108	0.0526961	2.73402e-06	5.18828e-05	0.0362657	2.39761e-06	6.61124e-05	8.85263	2019-01-21	6Hz	33 μm	~3 J/cm2	Line	1.6 µm/s	7800
91500	Seq_G_2 43	0.55019	0.0290517	0.0200615	0.0526929	2.40742e-06	4.56877e-05	0.0362638	1.97616e-06	5.4494e-05	8.68289	2019-01-21	6Hz	33 μm	~3 J/cm2	Line	1.6 µm/s	7800
91500	Seq_G_2 46	0.532772	0.0281062	0.0194051	0.0526779	3.30833e-06	6.2803e-05	0.0362355	2.37032e-06	6.54142e-05	8.53686	2019-01-21	6Hz	33 μm	~3 J/cm2	Line	1.6 µm/s	7800
91500	Seq_G_2 49	0.484053	0.0255372	0.0176209	0.0526604	2.68783e-06	5.10409e-05	0.0362106	3.01852e-06	8.336e-05	8.06696	2019-01-21	6Hz	33 μm	~3 J/cm2	Line	1.6 µm/s	7800
91500	Seq_G_2 52	0.442193	0.0233456	0.0160767	0.052649	2.71838e-06	5.16322e-05	0.0361953	2.55685e-06	7.06405e-05	7.68012	2019-01-21	6Hz	33 μm	~3 J/cm2	Line	1.6 µm/s	7800
91500	Seq_G_2 55	0.43244	0.0228213	0.0157195	0.0526446	2.86781e-06	5.44748e-05	0.0361928	2.39375e-06	6.61388e-05	7.78155	2019-01-21	6Hz	33 μm	~3 J/cm2	Line	1.6 µm/s	7800
91500	Seq_G_3 1	0.566388	0.0299369	0.0207718	0.0527519	2.83971e-06	5.38314e-05	0.0363443	2.56659e-06	7.06188e-05	8.1732	2019-01-21	6Hz	33 μm	~3 J/cm2	Line	1.6 µm/s	7800
91500	Seq_G_3 4	0.557533	0.0294694	0.0204405	0.0527418	2.69855e-06	5.11653e-05	0.0363362	1.96635e-06	5.41154e-05	8.25146	2019-01-21	6Hz	33 μm	~3 J/cm2	Line	1.6 µm/s	7800
91500	Seq_G_3 7	0.564186	0.0298144	0.0206865	0.0527468	2.8234e-06	5.35275e-05	0.0363359	2.69493e-06	7.41673e-05	8.26881	2019-01-21	6Hz	33 μm	~3 J/cm2	Line	1.6 µm/s	7800
91500	Seq_G_3 10	0.563361	0.02979	0.0206521	0.0527339	2.8674e-06	5.43748e-05	0.0363215	2.39207e-06	6.58581e-05	8.41814	2019-01-21	6Hz	33 μm	~3 J/cm2	Line	1.6 µm/s	7800
91500	Seq_G_3 13	0.532897	0.0281479	0.0195243	0.0527103	3.75289e-06	7.11984e-05	0.036285	2.54102e-06	7.00294e-05	8.36723	2019-01-21	6Hz	33 μm	~3 J/cm2	Line	1.6 µm/s	7800
91500	Seq_G_3 16	0.498258	0.0263036	0.0182095	0.0526854	2.73462e-06	5.19047e-05	0.0362501	2.35738e-06	6.50309e-05	8.13363	2019-01-21	6Hz	33 μm	~3 J/cm2	Line	1.6 µm/s	7800
91500	Seq_G_3 19	0.477084	0.0252075	0.0174208	0.0526763	2.57147e-06	4.88164e-05	0.0362357	2.63383e-06	7.26861e-05	7.90483	2019-01-21	6Hz	33 μm	~3 J/cm2	Line	1.6 µm/s	7800
91500	Seq_G_3 22	0.466979	0.0246661	0.0170477	0.0526704	2.8495e-06	5.41005e-05	0.0362268	2.41677e-06	6.67123e-05	7.83568	2019-01-21	6Hz	33 μm	~3 J/cm2	Line	1.6 µm/s	7800
91500	Seq_G_3 25	0.465394	0.0245773	0.0169664	0.0526639	3.67398e-06	6.97628e-05	0.0362191	2.38691e-06	6.5902e-05	7.73358	2019-01-21	6Hz	33 μm	~3 J/cm2	Line	1.6 µm/s	7800
91500	Seq_G_3 28	0.445074	0.0234887	0.0162164	0.0526555	2.71838e-06	5.16258e-05	0.0362041	2.4647e-06	6.8078e-05	7.54645	2019-01-21	6Hz	33 μm	~3 J/cm2	Line	1.6 µm/s	7800
91500	Seq_G_3 31	0.451088	0.0238221	0.0164427	0.0526539	2.87573e-06	5.46158e-05	0.0361991	2.52111e-06	6.96458e-05	7.47291	2019-01-21	6Hz	33 μm	~3 J/cm2	Line	1.6 µm/s	7800
91500	Seq_G_3 34	0.458528	0.0242144	0.0166914	0.0526511	2.83641e-06	5.38719e-05	0.0361992	2.32496e-06	6.42269e-05	7.5316	2019-01-21	6Hz	33 μm	~3 J/cm2	Line	1.6 µm/s	7800
91500	Seq_G_3 37	0.461102	0.0243407	0.0167823	0.0526522	3.45501e-06	6.56194e-05	0.0362013	2.85465e-06	7.8855e-05	7.54439	2019-01-21	6Hz	33 μm	~3 J/cm2	Line	1.6 µm/s	7800
91500	Seq_G_3 40	0.46865	0.0247372	0.0170719	0.0526541	2.4994e-06	4.74684e-05	0.036203	2.43218e-06	6.71817e-05	7.57156	2019-01-21	6Hz	33 μm	~3 J/cm2	Line	1.6 µm/s	7800
91500	Seq_G_3 43	0.48089	0.0253882	0.0175148	0.0526571	2.75982e-06	5.24112e-05	0.0362062	2.40963e-06	6.65528e-05	7.49966	2019-01-21	6Hz	33 μm	~3 J/cm2	Line	1.6 µm/s	7800
91500	Seq_G_3 46	0.486348	0.0256763	0.0177123	0.0526536	3.03352e-06	5.76128e-05	0.036206	2.61679e-06	7.2275e-05	7.4782	2019-01-21	6Hz	33 μm	~3 J/cm2	Line	1.6 µm/s	7800
91500	Seq_G_3 49	0.468647	0.0247347	0.0170684	0.052651	3.33323e-06	6.33079e-05	0.0361968	3.07863e-06	8.50523e-05	7.34103	2019-01-21	6Hz	33 μm	~3 J/cm2	Line	1.6 µm/s	7800
91500	Seq_G_3 52	0.445497	0.0235031	0.016189	0.0526355	3.44389e-06	6.54291e-05	0.0361809	2.92176e-06	8.07542e-05	7.07307	2019-01-21	6Hz	33 μm	~3 J/cm2	Line	1.6 µm/s	7800
91500	Seq_G_3 55	0.438331	0.0231309	0.0159219	0.052632	3.15345e-06	5.99151e-05	0.0361727	2.6441e-06	7.30964e-05	6.95323	2019-01-21	6Hz	33 μm	~3 J/cm2	Line	1.6 µm/s	7800
91500	Seq_G_3 58	0.431555	0.0227675	0.0156942	0.0526279	3.54674e-06	6.73928e-05	0.0361702	2.80229e-06	7.7475e-05	6.90784	2019-01-21	6Hz	33 μm	~3 J/cm2	Line	1.6 µm/s	7800
91500	Seq_G_3 61	0.422539	0.0223018	0.0153388	0.0526234	3.42049e-06	6.49995e-05	0.0361577	2.15514e-06	5.96038e-05	6.89371	2019-01-21	6Hz	33 μm	~3 J/cm2	Line	1.6 µm/s	7800
91500-B	Seq_std_11	0.460967	0.0243191	0.0167746	0.0526514	3.01761e-06	5.7313e-05	0.0361976	2.77389e-06	7.66321e-05	7.34215	2019-01-21	6Hz	33 μm	~3 J/cm2	Line	1.6 µm/s	7800
91500-B	Seq_std_12	0.460219	0.0242737	0.0167495	0.0526459	3.17231e-06	6.02574e-05	0.0361933	2.51739e-06	6.9554e-05	7.29386	2019-01-21	6Hz	33 μm	~3 J/cm2	Line	1.6 µm/s	7800
91500(retune)	Seq_G_2 19bis	0.570471	0.0301211	0.0208297	0.0527265	3.4555e-06	6.55363e-05	0.036306	2.29304e-06	6.31588e-05	9.52538	2019-01-21	6Hz	33 μm	~3 J/cm2	Line	1.6 µm/s	7800
AS3	Seq_G_2 48	0.495149	0.0261272	0.0180229	0.052657	3.31426e-06	6.29406e-05	0.0362072	2.62427e-06	7.24793e-05	8.27662	2019-01-21	6Hz	33 μm	~3 J/cm2	Line	1.6 µm/s	7800
AS3-1	Seq_std_8	0.457009	0.024104	0.0166276	0.0526469	3.88457e-06	7.37852e-05	0.036194	3.24103e-06	8.95462e-05	7.60656	2019-01-21	6Hz	33 μm	~3 J/cm2	Line	1.6 µm/s	7800
AS3-1	Seq_G_3 14	0.522012	0.0275749	0.0190989	0.0526976	2.9384e-06	5.57597e-05	0.036273	2.38689e-06	6.58035e-05	8.70858	2019-01-21	6Hz	33 μm	~3 J/cm2	Line	1.6 µm/s	7800
AS3-2	Seq_std_9	0.467367	0.0246546	0.0170013	0.0526484	3.27749e-06	6.22524e-05	0.0361962	2.58416e-06	7.1393e-05	7.72778	2019-01-21	6Hz	33 μm	~3 J/cm2	Line	1.6 µm/s	7800
AS3-2	Seq_G_3 15	0.50874	0.0268725	0.0186219	0.0526899	3.24632e-06	6.16118e-05	0.0362594	2.88281e-06	7.95053e-05	8.31828	2019-01-21	6Hz	33 μm	~3 J/cm2	Line	1.6 µm/s	7800
KIM-1	Seq_std_5	0.444142	0.0234117	0.0161685	0.0526499	3.24293e-06	6.15943e-05	0.0362019	2.95416e-06	8.16023e-05	6.86869	2019-01-21	6Hz	33 μm	~3 J/cm2	Line	1.6 µm/s	7800
KIM-1	Seq_G_1 2	0.715084	0.0377575	0.0257152	0.0527585	3.39825e-06	6.44115e-05	0.0363038	3.23867e-06	8.92102e-05	7.39549	2019-01-21	6Hz	33 μm	~3 J/cm2	Line	1.6 µm/s	7800
KIM-1	Seq_G_2 2	0.684269	0.0361256	0.0250493	0.0527453	2.88615e-06	5.47187e-05	0.0363429	2.46507e-06	6.78281e-05	8.64845	2019-01-21	6Hz	33 μm	~3 J/cm2	Line	1.6 µm/s	7800
KIM-1	Seq_G_3 2	0.556591	0.0294034	0.0204335	0.0527497	2.9946e-06	5.677e-05	0.0363448	1.9955e-06	5.49048e-05	8.03683	2019-01-21	6Hz	33 μm	~3 J/cm2	Line	1.6 µm/s	7800
KIM-2	Seq_std_6	0.44797	0.0236151	0.0162971	0.0526494	3.40933e-06	6.47554e-05	0.0362014	2.78712e-06	7.69893e-05	6.85543	2019-01-21	6Hz	33 μm	~3 J/cm2	Line	1.6 µm/s	7800
KIM-2	Seq_G_1 3	0.710443	0.0374987	0.0255196	0.0527433	2.77963e-06	5.27011e-05	0.0362815	2.60064e-06	7.16794e-05	7.34807	2019-01-21	6Hz	33 μm	~3 J/cm2	Line	1.6 µm/s	7800
KIM-2	Seq_G_2 3	0.6783	0.0358273	0.0248176	0.0527404	2.13488e-06	4.04791e-05	0.0363309	2.46857e-06	6.79468e-05	8.83964	2019-01-21	6Hz	33 μm	~3 J/cm2	Line	1.6 µm/s	7800
KIM-2	Seq_G_3 3	0.556138	0.0293773	0.0204148	0.0527486	2.89373e-06	5.48589e-05	0.0363396	3.50192e-06	9.63665e-05	8.07107	2019-01-21	6Hz	33 μm	~3 J/cm2	Line	1.6 µm/s	7800
KIM-3	Seq_G_1 35	0.42845	0.0225819	0.0155414	0.0526096	4.04981e-06	7.69786e-05	0.0361407	3.0582e-06	8.46192e-05	5.15767	2019-01-21	6Hz	33 μm	~3 J/cm2	Line	1.6 µm/s	7800
KIM-3	Seq_G_2 17	0.493371	0.0260256	0.0179832	0.0526706	2.73822e-06	5.19876e-05	0.0362287	2.99563e-06	8.26866e-05	7.04889	2019-01-21	6Hz	33 μm	~3 J/cm2	Line	1.6 µm/s	7800
KIM-3	Seq_G_3 26	0.453725	0.0239542	0.016537	0.0526637	3.47104e-06	6.59095e-05	0.036217	3.18669e-06	8.79889e-05	6.93523	2019-01-21	6Hz	33 μm	~3 J/cm2	Line	1.6 µm/s	7800
KIM-4	Seq_G_1 36	0.416144	0.0219206	0.0150771	0.0526061	4.06245e-06	7.72239e-05	0.0361367	3.03827e-06	8.40772e-05	5.01526	2019-01-21	6Hz	33 μm	~3 J/cm2	Line	1.6 µm/s	7800
KIM-4	Seq_G_2 29	0.583972	0.0308267	0.0213053	0.0527217	3.37403e-06	6.3997e-05	0.0362932	2.89749e-06	7.98357e-05	7.80939	2019-01-21	6Hz	33 μm	~3 J/cm2	Line	1.6 µm/s	7800
KIM-4	Seq_G_3 27	0.448332	0.0236876	0.0163396	0.0526551	3.6291e-06	6.89222e-05	0.036204	2.32812e-06	6.43057e-05	6.94611	2019-01-21	6Hz	33 μm	~3 J/cm2	Line	1.6 µm/s	7800
KIM-5	Seq_G_2 41	0.553436	0.0292159	0.0202014	0.0527007	3.26515e-06	6.19566e-05	0.0362724	2.68574e-06	7.40435e-05	7.64654	2019-01-21	6Hz	33 μm	~3 J/cm2	Line	1.6 µm/s	7800
KIM-5	Seq_G_3 50	0.457088	0.0241128	0.0166553	0.0526429	2.87138e-06	5.45446e-05	0.0361854	2.48776e-06	6.87505e-05	7.47465	2019-01-21	6Hz	33 μm	~3 J/cm2	Line	1.6 µm/s	7800
KIM-6	Seq_G_2 53	0.429188	0.0226452	0.015604	0.0526455	3.28136e-06	6.23294e-05	0.0361978	2.34571e-06	6.48026e-05	7.0065	2019-01-21	6Hz	33 μm	~3 J/cm2	Line	1.6 µm/s	7800
KIM-6	Seq_G_3 51	0.44708	0.0235846	0.0162698	0.0526342	2.79927e-06	5.31834e-05	0.0361774	2.53955e-06	7.01972e-05	7.4296	2019-01-21	6Hz	33 μm	~3 J/cm2	Line	1.6 µm/s	7800
KL-1	Seq_G_1 5	0.696545	0.0367574	0.0250619	0.0527348	3.21628e-06	6.09898e-05	0.0362781	2.56277e-06	7.06423e-05	7.63662	2019-01-21	6Hz	33 μm	~3 J/cm2	Line	1.6 µm/s	7800
KL-2	Seq_G_1 6	0.689966	0.0364001	0.0248516	0.0527247	3.0248e-06	5.73696e-05	0.0362703	2.29149e-06	6.31782e-05	7.88646	2019-01-21	6Hz	33 μm	~3 J/cm2	Line	1.6 µm/s	7800
KL-3	Seq_G_2 38	0.570616	0.030095	0.020796	0.0526791	3.90437e-06	7.41162e-05	0.0362412	2.63581e-06	7.27295e-05	8.72534	2019-01-21	6Hz	33 μm	~3 J/cm2	Line	1.6 µm/s	7800
MUN-1	Seq_std_2	0.461462	0.0243492	0.0167925	0.0526053	3.2221e-06	6.12505e-05	0.0361371	2.78371e-06	7.70319e-05	7.03582	2019-01-21	6Hz	33 μm	~3 J/cm2	Line	1.6 µm/s	7800
MUN-1	Seq_G_2 5	0.655166	0.0345745	0.0239403	0.0526961	2.7135e-06	5.14934e-05	0.0362724	2.17238e-06	5.98907e-05	9.02573	2019-01-21	6Hz	33 μm	~3 J/cm2	Line	1.6 µm/s	7800
MUN-1	Seq_G_3 38	0.469969	0.0248234	0.0171188	0.0526085	3.02591e-06	5.75175e-05	0.0361413	2.69402e-06	7.45412e-05	8.20266	2019-01-21	6Hz	33 μm	~3 J/cm2	Line	1.6 µm/s	7800
MUN-2	Seq_std_3	0.452142	0.0238524	0.0164654	0.0526054	2.74161e-06	5.21165e-05	0.0361348	2.78995e-06	7.72094e-05	7.24306	2019-01-21	6Hz	33 μm	~3 J/cm2	Line	1.6 µm/s	7800
MUN-2	Seq_G_2 6	0.641292	0.0338349	0.0234248	0.0526855	2.8445e-06	5.39902e-05	0.0362539	1.98664e-06	5.47979e-05	9.05737	2019-01-21	6Hz	33 μm	~3 J/cm2	Line	1.6 µm/s	7800
MUN-2	Seq_G_3 39	0.466811	0.0246582	0.0170177	0.0526076	3.47192e-06	6.59965e-05	0.0361375	2.42362e-06	6.70667e-05	8.18742	2019-01-21	6Hz	33 μm	~3 J/cm2	Line	1.6 µm/s	7800
MUN-3	Seq_G_2 18	0.486067	0.0256374	0.0176873	0.0526287	2.45353e-06	4.66197e-05	0.0361747	3.07258e-06	8.49375e-05	7.41193	2019-01-21	6Hz	33 μm	~3 J/cm2	Line	1.6 µm/s	7800
MUN-3	Seq_G_2 45	0.535807	0.0282605	0.0194848	0.0526536	2.96714e-06	5.6352e-05	0.036201	3.4873e-06	9.63317e-05	8.51715	2019-01-21	6Hz	33 μm	~3 J/cm2	Line	1.6 µm/s	7800
MUN-4	Seq_G_2 30	0.583947	0.0308294	0.0213144	0.0526723	2.60973e-06	4.95464e-05	0.0362313	2.455e-06	6.77593e-05	8.63879	2019-01-21	6Hz	33 μm	~3 J/cm2	Line	1.6 µm/s	7800
MUN-5	Seq_G_2 42	0.55729	0.0294241	0.0203385	0.052656	2.73251e-06	5.18935e-05	0.0362129	2.36186e-06	6.52215e-05	8.32723	2019-01-21	6Hz	33 μm	~3 J/cm2	Line	1.6 µm/s	7800
MUN-6	Seq_G_2 54	0.434646	0.0229257	0.0158069	0.052608	3.94895e-06	7.50638e-05	0.0361357	2.58178e-06	7.14468e-05	7.15355	2019-01-21	6Hz	33 μm	~3 J/cm2	Line	1.6 µm/s	7800
91500	Seq_G_4 1	0.83481	0.0441264	0.0305963	0.0528562	2.45641e-06	4.64735e-05	0.036491	2.17679e-06	5.96526e-05	10.3851	2019-01-22	6Hz	33 μm	~3 J/cm2	Line	1.6 µm/s	7800
91500	Seq_G_4 4	0.72929	0.0385178	0.0266656	0.0528043	2.67432e-06	5.06459e-05	0.0364207	2.65987e-06	7.30319e-05	9.74462	2019-01-22	6Hz	33 μm	~3 J/cm2	Line	1.6 µm/s	7800
91500	Seq_G_4 7	0.652407	0.0344467	0.023792	0.0527668	3.12268e-06	5.91789e-05	0.0363601	2.72457e-06	7.4933e-05	8.96487	2019-01-22	6Hz	33 μm	~3 J/cm2	Line	1.6 µm/s	7800
91500	Seq_G_4 10	0.613878	0.0323918	0.022521	0.0527426	2.82507e-06	5.35633e-05	0.036333	2.2831e-06	6.28382e-05	8.38253	2019-01-22	6Hz	33 μm	~3 J/cm2	Line	1.6 µm/s	7800
91500	Seq_G_4 13	0.565263	0.0298162	0.020546	0.0527195	2.36223e-06	4.48075e-05	0.0362939	2.15827e-06	5.94663e-05	7.69525	2019-01-22	6Hz	33 μm	~3 J/cm2	Line	1.6 µm/s	7800
91500	Seq_G_4 13bis	0.757431	0.0399941	0.0276862	0.0527811	2.34121e-06	4.43569e-05	0.0363857	1.90737e-06	5.24208e-05	10.1016	2019-01-22	6Hz	33 μm	~3 J/cm2	Line	1.6 µm/s	7800
91500	Seq_G_4 16	0.746249	0.0394127	0.0272671	0.052767	2.56144e-06	4.85424e-05	0.0363646	1.91471e-06	5.2653e-05	10.287	2019-01-22	6Hz	33 μm	~3 J/cm2	Line	1.6 µm/s	7800
91500	Seq_G_4 19	0.755049	0.0398517	0.0275387	0.0527544	2.04123e-06	3.86931e-05	0.0363485	1.85363e-06	5.0996e-05	10.0573	2019-01-22	6Hz	33 μm	~3 J/cm2	Line	1.6 µm/s	7800
91500	Seq_G_4 22	0.749741	0.0395615	0.027419	0.0527423	2.48507e-06	4.71172e-05	0.0363395	2.82375e-06	7.77047e-05	9.83131	2019-01-22	6Hz	33 μm	~3 J/cm2	Line	1.6 µm/s	7800
91500	Seq_G_4 25	0.731015	0.0385817	0.0266444	0.0527309	2.87769e-06	5.4573e-05	0.036315	1.94519e-06	5.35643e-05	9.53633	2019-01-22	6Hz	33 μm	~3 J/cm2	Line	1.6 µm/s	7800
91500	Seq_G_4 28	0.702899	0.0370879	0.0255864	0.0527219	2.96218e-06	5.6185e-05	0.0362998	1.93472e-06	5.32983e-05	9.27579	2019-01-22	6Hz	33 μm	~3 J/cm2	Line	1.6 µm/s	7800
91500	Seq_G_4 31	0.662355	0.0349439	0.0240512	0.0527041	2.85779e-06	5.42233e-05	0.0362723	2.7676e-06	7.63007e-05	8.93483	2019-01-22	6Hz	33 μm	~3 J/cm2	Line	1.6 µm/s	7800
91500	Seq_M_1 1	0.695941	0.0367765	0.0255121	0.0527857	1.9787e-06	3.74855e-05	0.0363929	1.90736e-06	5.24101e-05	9.72217	2019-01-22	6Hz	33 μm	~3 J/cm2	Line	1.6 µm/s	7800
91500	Seq_M_1 4	0.664352	0.0350962	0.0243167	0.052766	3.13737e-06	5.94582e-05	0.0363647	2.17413e-06	5.9787e-05	9.64463	2019-01-22	6Hz	33 μm	~3 J/cm2	Line	1.6 µm/s	7800
91500	Seq_M_1 7	0.625911	0.0330577	0.0228651	0.0527485	2.38992e-06	4.53079e-05	0.0363329	2.38483e-06	6.56382e-05	9.23432	2019-01-22	6Hz	33 μm	~3 J/cm2	Line	1.6 µm/s	7800
91500	Seq_M_1 10	0.60748	0.0320701	0.0221727	0.0527358	3.19259e-06	6.05393e-05	0.0363164	2.36268e-06	6.50583e-05	8.92918	2019-01-22	6Hz	33 μm	~3 J/cm2	Line	1.6 µm/s	7800
91500	Seq_M_1 13	0.601593	0.0317661	0.021919	0.0527251	2.51811e-06	4.77592e-05	0.0363045	2.35028e-06	6.47379e-05	8.74872	2019-01-22	6Hz	33 μm	~3 J/cm2	Line	1.6 µm/s	7800
91500	Seq_M_1 16	0.590711	0.0311859	0.0215208	0.0527206	2.3569e-06	4.47056e-05	0.0362969	2.67763e-06	7.37702e-05	8.91436	2019-01-22	6Hz	33 μm	~3 J/cm2	Line	1.6 µm/s	7800
91500	Seq_M_1 16bis	0.636457	0.0336618	0.0233152	0.0527903	2.14386e-06	4.06108e-05	0.0363999	2.53461e-06	6.96324e-05	9.39338	2019-01-22	6Hz	33 μm	~3 J/cm2	Line	1.6 µm/s	7800
91500	Seq_M_1 19	0.617344	0.0326312	0.0226094	0.0527819	2.48882e-06	4.7153e-05	0.0363825	3.06584e-06	8.4267e-05	9.39956	2019-01-22	6Hz	33 μm	~3 J/cm2	Line	1.6 µm/s	7800
91500	Seq_M_1 22	0.61344	0.032422	0.0224424	0.0527754	2.65912e-06	5.03857e-05	0.0363799	2.31062e-06	6.35137e-05	9.3881	2019-01-22	6Hz	33 μm	~3 J/cm2	Line	1.6 µm/s	7800
91500	Seq_M_1 25	0.62913	0.0332593	0.0230202	0.0527719	3.0164e-06	5.71593e-05	0.036374	2.50906e-06	6.89796e-05	9.62838	2019-01-22	6Hz	33 μm	~3 J/cm2	Line	1.6 µm/s	7800
91500	Seq_M_1 28	0.633982	0.0335193	0.0231873	0.0527699	2.80552e-06	5.31652e-05	0.0363661	2.40001e-06	6.59957e-05	9.4882	2019-01-22	6Hz	33 μm	~3 J/cm2	Line	1.6 µm/s	7800
91500	Seq_M_1 31	0.647832	0.0342294	0.0237217	0.0527678	2.36001e-06	4.47243e-05	0.0363654	2.21795e-06	6.09907e-05	9.42539	2019-01-22	6Hz	33 μm	~3 J/cm2	Line	1.6 µm/s	7800
91500	Seq_M_1 34	0.654779	0.0345965	0.0239352	0.0527716	2.70592e-06	5.1276e-05	0.0363652	2.41621e-06	6.6443e-05	9.48862	2019-01-22	6Hz	33 μm	~3 J/cm2	Line	1.6 µm/s	7800
91500	Seq_M_1 37	0.657153	0.0347496	0.0240255	0.0527668	2.95038e-06	5.59136e-05	0.0363605	2.48547e-06	6.83564e-05	9.48762	2019-01-22	6Hz	33 μm	~3 J/cm2	Line	1.6 µm/s	7800
91500	Seq_M_1 40	0.650374	0.0343768	0.023756	0.0527612	2.22075e-06	4.20906e-05	0.0363532	1.93412e-06	5.32035e-05	9.43582	2019-01-22	6Hz	33 μm	~3 J/cm2	Line	1.6 µm/s	7800
91500	Seq_M_1 43	0.645116	0.0340914	0.0235593	0.0527582	3.38695e-06	6.41975e-05	0.0363448	3.12351e-06	8.5941e-05	9.36658	2019-01-22	6Hz	33 μm	~3 J/cm2	Line	1.6 µm/s	7800
91500	Seq_M_1 46	0.643911	0.0340264	0.0235185	0.0527561	2.39962e-06	4.54851e-05	0.0363442	2.11837e-06	5.82865e-05	9.3158	2019-01-22	6Hz	33 μm	~3 J/cm2	Line	1.6 µm/s	7800
91500	Seq_M_1 49	0.646918	0.0341747	0.0236041	0.0527519	2.60003e-06	4.9288e-05	0.0363392	2.06615e-06	5.68573e-05	9.13925	2019-01-22	6Hz	33 μm	~3 J/cm2	Line	1.6 µm/s	7800
91500	Seq_M_1 52	0.63608	0.0335828	0.0232163	0.0527516	2.83192e-06	5.36841e-05	0.0363357	2.0502e-06	5.64238e-05	9.25351	2019-01-22	6Hz	33 μm	~3 J/cm2	Line	1.6 µm/s	7800
91500	Seq_M_2 1	0.595007	0.0314328	0.0217442	0.0527323	2.48288e-06	4.70846e-05	0.0363132	2.24027e-06	6.16929e-05	9.07625	2019-01-22	6Hz	33 μm	~3 J/cm2	Line	1.6 µm/s	7800
91500	Seq_M_2 4	0.575472	0.030414	0.0209906	0.0527232	2.35608e-06	4.46877e-05	0.0363009	2.65396e-06	7.311e-05	9.04401	2019-01-22	6Hz	33 μm	~3 J/cm2	Line	1.6 µm/s	7800
91500	Seq_M_2 7	0.575288	0.0304019	0.0209765	0.052717	3.15476e-06	5.98433e-05	0.0362936	2.43929e-06	6.72099e-05	9.01553	2019-01-22	6Hz	33 μm	~3 J/cm2	Line	1.6 µm/s	7800
91500	Seq_M_2 10	0.571541	0.030199	0.0208413	0.0527152	3.19055e-06	6.05243e-05	0.0362889	2.16912e-06	5.97735e-05	9.00922	2019-01-22	6Hz	33 μm	~3 J/cm2	Line	1.6 µm/s	7800
91500	Seq_M_2 13	0.557561	0.0294443	0.0203262	0.0527084	2.92879e-06	5.55658e-05	0.036279	2.56311e-06	7.06499e-05	8.88669	2019-01-22	6Hz	33 μm	~3 J/cm2	Line	1.6 µm/s	7800
91500	Seq_M_2 16	0.541445	0.0285867	0.0197144	0.0527026	2.84437e-06	5.39702e-05	0.0362649	2.28475e-06	6.30015e-05	8.94686	2019-01-22	6Hz	33 μm	~3 J/cm2	Line	1.6 µm/s	7800
91500	Seq_M_2 19	0.524643	0.0277075	0.0190785	0.0526918	2.43217e-06	4.61584e-05	0.0362539	2.25848e-06	6.22963e-05	8.68824	2019-01-22	6Hz	33 μm	~3 J/cm2	Line	1.6 µm/s	7800
91500	Seq_M_2 22	0.530912	0.028039	0.0193152	0.0526916	3.30163e-06	6.26594e-05	0.0362527	2.27752e-06	6.28235e-05	8.68284	2019-01-22	6Hz	33 μm	~3 J/cm2	Line	1.6 µm/s	7800
91500	Seq_M_2 25	0.536864	0.0283536	0.0195348	0.0526933	2.88781e-06	5.4804e-05	0.0362548	2.85571e-06	7.87677e-05	8.70601	2019-01-22	6Hz	33 μm	~3 J/cm2	Line	1.6 µm/s	7800
91500	Seq_M_2 28	0.542762	0.0286633	0.0197501	0.0526944	2.38101e-06	4.51853e-05	0.036257	2.22353e-06	6.13268e-05	8.69181	2019-01-22	6Hz	33 μm	~3 J/cm2	Line	1.6 µm/s	7800
91500	Seq_M_2 31	0.541335	0.0285785	0.0196895	0.0526949	3.27505e-06	6.21513e-05	0.0362543	2.13184e-06	5.88025e-05	8.42876	2019-01-22	6Hz	33 μm	~3 J/cm2	Line	1.6 µm/s	7800
91500	Seq_M_2 34	0.545991	0.0288314	0.0198733	0.0526935	2.70096e-06	5.12579e-05	0.0362589	2.32264e-06	6.40571e-05	8.45773	2019-01-22	6Hz	33 μm	~3 J/cm2	Line	1.6 µm/s	7800
91500	Seq_M_2 37	0.538391	0.0284101	0.0195934	0.0526873	2.98942e-06	5.67388e-05	0.0362503	2.40614e-06	6.63757e-05	8.37731	2019-01-22	6Hz	33 μm	~3 J/cm2	Line	1.6 µm/s	7800
91500	Seq_M_2 40	0.530389	0.0279963	0.01928	0.0526843	2.92895e-06	5.55944e-05	0.0362377	2.73249e-06	7.54046e-05	8.24822	2019-01-22	6Hz	33 μm	~3 J/cm2	Line	1.6 µm/s	7800
AS3-1	Seq_G_4 14	0.74734	0.0394734	0.0273178	0.0527721	2.65278e-06	5.02686e-05	0.0363718	2.25109e-06	6.18911e-05	10.8729	2019-01-22	6Hz	33 μm	~3 J/cm2	Line	1.6 µm/s	7800
AS3-1	Seq_M_1 3	0.676019	0.0356944	0.0247307	0.05277	2.34611e-06	4.44592e-05	0.0363744	2.25955e-06	6.21193e-05	9.87092	2019-01-22	6Hz	33 μm	~3 J/cm2	Line	1.6 µm/s	7800
AS3-1	Seq_M_2 3	0.579225	0.0305912	0.0211462	0.0527211	2.7056e-06	5.13191e-05	0.036297	2.05269e-06	5.65527e-05	9.31548	2019-01-22	6Hz	33 μm	~3 J/cm2	Line	1.6 µm/s	7800
AS3-2	Seq_G_4 15	0.746131	0.0394101	0.0272712	0.0527667	2.26683e-06	4.29594e-05	0.0363644	2.25255e-06	6.19437e-05	10.8762	2019-01-22	6Hz	33 μm	~3 J/cm2	Line	1.6 µm/s	7800
AS3-2	Seq_M_1 15	0.599779	0.0316782	0.0218572	0.0527174	2.80437e-06	5.31964e-05	0.0362946	2.06877e-06	5.69994e-05	9.38821	2019-01-22	6Hz	33 μm	~3 J/cm2	Line	1.6 µm/s	7800
AS3-2	Seq_M_2 15	0.548454	0.0289548	0.0199598	0.0526991	2.55639e-06	4.85091e-05	0.0362642	2.95601e-06	8.15132e-05	9.18185	2019-01-22	6Hz	33 μm	~3 J/cm2	Line	1.6 µm/s	7800
AS3-3	Seq_G_4 29	0.691218	0.0364681	0.0251452	0.0527193	2.6421e-06	5.01164e-05	0.0362945	2.27431e-06	6.26627e-05	9.62871	2019-01-22	6Hz	33 μm	~3 J/cm2	Line	1.6 µm/s	7800
AS3-3	Seq_M_1 27	0.638282	0.0337217	0.023351	0.0527674	2.84478e-06	5.39117e-05	0.0363655	2.53125e-06	6.96059e-05	9.00415	2019-01-22	6Hz	33 μm	~3 J/cm2	Line	1.6 µm/s	7800
AS3-3	Seq_M_2 27	0.541789	0.0286163	0.0197014	0.0526931	3.08309e-06	5.85103e-05	0.036249	2.16794e-06	5.9807e-05	8.53347	2019-01-22	6Hz	33 μm	~3 J/cm2	Line	1.6 µm/s	7800
AS3-4	Seq_G_4 30	0.680296	0.0358787	0.0247423	0.0527137	2.78118e-06	5.27601e-05	0.036287	2.56219e-06	7.06091e-05	9.2796	2019-01-22	6Hz	33 μm	~3 J/cm2	Line	1.6 µm/s	7800
AS3-4	Seq_M_1 39	0.659298	0.0348476	0.0240805	0.0527581	2.63205e-06	4.98891e-05	0.0363482	2.82603e-06	7.77487e-05	9.34241	2019-01-22	6Hz	33 μm	~3 J/cm2	Line	1.6 µm/s	7800
AS3-4	Seq_M_2 39	0.529994	0.0279941	0.019269	0.0526816	2.85754e-06	5.42418e-05	0.0362398	2.53623e-06	6.99846e-05	8.04202	2019-01-22	6Hz	33 μm	~3 J/cm2	Line	1.6 µm/s	7800
AS3-5	Seq_M_1 51	0.640725	0.0338475	0.0233708	0.0527473	2.58082e-06	4.8928e-05	0.0363299	2.25049e-06	6.19461e-05	9.29488	2019-01-22	6Hz	33 μm	~3 J/cm2	Line	1.6 µm/s	7800
MUN-1	Seq_G_4 2	0.79084	0.0418242	0.0289429	0.0527938	2.78272e-06	5.27092e-05	0.0364023	2.57757e-06	7.08078e-05	10.7391	2019-01-22	6Hz	33 μm	~3 J/cm2	Line	1.6 µm/s	7800
MUN-1	Seq_M_1 2	0.68023	0.0359495	0.0249205	0.0527454	2.72868e-06	5.17331e-05	0.0363382	2.52322e-06	6.94371e-05	9.68613	2019-01-22	6Hz	33 μm	~3 J/cm2	Line	1.6 µm/s	7800
MUN-1	Seq_M_2 2	0.581068	0.0306934	0.0212177	0.0526873	2.50355e-06	4.75171e-05	0.0362542	2.06875e-06	5.70622e-05	8.91178	2019-01-22	6Hz	33 μm	~3 J/cm2	Line	1.6 µm/s	7800
MUN-2	Seq_G_4 3	0.754201	0.0398639	0.0275946	0.0527794	2.32959e-06	4.41383e-05	0.0363787	1.89375e-06	5.20567e-05	10.4152	2019-01-22	6Hz	33 μm	~3 J/cm2	Line	1.6 µm/s	7800
MUN-2	Seq_M_1 14	0.608474	0.0321177	0.0221816	0.0526881	2.65727e-06	5.0434e-05	0.0362534	2.50275e-06	6.90348e-05	9.06028	2019-01-22	6Hz	33 μm	~3 J/cm2	Line	1.6 µm/s	7800
MUN-2	Seq_M_2 14	0.553522	0.0292426	0.020155	0.0526621	3.10747e-06	5.90077e-05	0.0362154	2.00846e-06	5.54586e-05	9.04856	2019-01-22	6Hz	33 μm	~3 J/cm2	Line	1.6 µm/s	7800
MUN-3	Seq_G_4 26	0.716725	0.0378019	0.0261132	0.052686	2.73731e-06	5.19552e-05	0.0362541	1.95536e-06	5.39347e-05	9.87268	2019-01-22	6Hz	33 μm	~3 J/cm2	Line	1.6 µm/s	7800
MUN-3	Seq_M_1 26	0.627336	0.0331777	0.0229411	0.0527383	2.27303e-06	4.31002e-05	0.0363273	2.94995e-06	8.12047e-05	9.57015	2019-01-22	6Hz	33 μm	~3 J/cm2	Line	1.6 µm/s	7800
MUN-3	Seq_M_2 26	0.535223	0.028265	0.01947	0.0526513	2.70038e-06	5.1288e-05	0.036203	2.21628e-06	6.12181e-05	8.70877	2019-01-22	6Hz	33 μm	~3 J/cm2	Line	1.6 µm/s	7800
MUN-4	Seq_G_4 27	0.705009	0.0372083	0.0256581	0.0526863	2.66447e-06	5.05724e-05	0.0362491	2.43581e-06	6.71963e-05	9.69936	2019-01-22	6Hz	33 μm	~3 J/cm2	Line	1.6 µm/s	7800
MUN-4	Seq_M_1 38	0.652882	0.0344912	0.0238549	0.0527292	2.22712e-06	4.2237e-05	0.03631	2.10586e-06	5.79969e-05	9.63091	2019-01-22	6Hz	33 μm	~3 J/cm2	Line	1.6 µm/s	7800
MUN-4	Seq_M_2 38	0.530638	0.0280011	0.0192877	0.0526473	2.65072e-06	5.03486e-05	0.0361946	2.32056e-06	6.41135e-05	8.50093	2019-01-22	6Hz	33 μm	~3 J/cm2	Line	1.6 µm/s	7800
MUN-5	Seq_M_1 50	0.642068	0.0339343	0.0234285	0.0527086	2.6682e-06	5.06217e-05	0.036278	2.66744e-06	7.35279e-05	9.60493	2019-01-22	6Hz	33 μm	~3 J/cm2	Line	1.6 µm/s	7800
